# Supplementary material for: Expression differences in Aphidius ervi (Hymenoptera: Braconidae) females reared on different aphid host species
Source: PeerJ. 2017 Aug 21;5:e3640. doi: 10.7717/peerj.3640 (PMC5572533; doi:10.7717/peerj.3640)
Supplement: Table S1 [file peerj-05-3640-s001.xlsx]

## Sheet: Ae - AP up - Body
Suplementary table 1, page 1: genes up-regulated in Bodies of Aphidius ervi - AP compared to Aphidius ervi - SA
ID	Sequence description	LogFC	PValue	FDR	Seq Length	#Gos	Gos	Enzyme Codes	InterProScan
TR52610|c0_g1_i1	sodium hydrogen exchanger 7 isoform x4	13.5707	6.4765e-20	3.7291e-16	2555	4	P:homeostatic process; P:transport; F:transmembrane transporter activity; C:cellular_component; P:transmembrane transport	-	IPR002090 (PRINTS); IPR004709 (PRINTS); IPR004709 (TIGRFAM); IPR006153 (PFAM); PTHR10110:SF94 (PANTHER); PTHR10110:SF94 (PANTHER); IPR018422 (PANTHER); IPR018422 (PANTHER); NON_CYTOPLASMIC_DOMAIN (PHOBIUS); CYTOPLASMIC_DOMAIN (PHOBIUS); TRANSMEMBRANE (PHOBIUS); CYTOPLASMIC_DOMAIN (PHOBIUS); TRANSMEMBRANE (PHOBIUS); TRANSMEMBRANE (PHOBIUS); TRANSMEMBRANE (PHOBIUS); TRANSMEMBRANE (PHOBIUS); TRANSME…
TR27559|c2_g1_i1	rho gtpase-activating protein 190 isoform x1	13.2683	1.1815e-19	4.815e-16	5230	3	F:ion binding; C:cellular_component; P:signal transduction	-	Coil (COILS); IPR000198 (SMART); IPR020849 (SMART); IPR032835 (PFAM); IPR027417 (G3DSA:3.40.50.GENE3D); IPR001806 (PFAM); IPR000198 (G3DSA:1.10.555.GENE3D); IPR000198 (PFAM); PTHR23175 (PANTHER); PTHR23175 (PANTHER); PTHR23175:SF4 (PANTHER); PTHR23175 (PANTHER); PTHR23175:SF4 (PANTHER); PTHR23175:SF4 (PANTHER); IPR002713 (PROSITE_PROFILES); IPR002713 (PROSITE_PROFILES); IPR000198 (PROSITE_PROFILE…
TR40585|c0_g1_i1	protein purity of essence isoform x3	13.1912	4.221e-19	1.0635e-15	3755	0	-		PTHR21725 (PANTHER); PTHR21725:SF1 (PANTHER)
TR36885|c0_g2_i1	oxidoreductase glyr1 homolog	12.1674	2.8645e-16	3.71e-13	1879	6	F:oxidoreductase activity; F:molecular_function; P:biological_process; P:small molecule metabolic process; P:cellular nitrogen compound metabolic process; P:carbohydrate metabolic process; P:catabolic process; P:cofactor metabolic process	EC:1.1.1.44	IPR000313 (SMART); G3DSA:2.30.30.160 (GENE3D); IPR016040 (G3DSA:3.40.50.GENE3D); IPR006115 (PFAM); IPR013328 (G3DSA:1.10.1040.GENE3D); IPR000313 (PFAM); IPR029154 (PFAM); PTHR22981:SF67 (PANTHER); PTHR22981 (PANTHER); PTHR22981 (PANTHER); IPR000313 (PROSITE_PROFILES); IPR016040 (SUPERFAMILY); SSF63748 (SUPERFAMILY); IPR008927 (SUPERFAMILY)
TR42270|c3_g5_i10	calcium-activated potassium channel slowpoke	12.1206	3.425e-16	6.795e-13	1568	4	C:protein complex; C:plasma membrane; F:transmembrane transporter activity; P:transport; P:transmembrane transport	-	IPR028325 (PRINTS); IPR005821 (PFAM); G3DSA:1.10.287.70 (GENE3D); PTHR10027 (PANTHER); IPR024939 (PTHR10027:PANTHER); NON_CYTOPLASMIC_DOMAIN (PHOBIUS); TRANSMEMBRANE (PHOBIUS); CYTOPLASMIC_DOMAIN (PHOBIUS); CYTOPLASMIC_DOMAIN (PHOBIUS); TRANSMEMBRANE (PHOBIUS); NON_CYTOPLASMIC_DOMAIN (PHOBIUS); TRANSMEMBRANE (PHOBIUS); NON_CYTOPLASMIC_DOMAIN (PHOBIUS); CYTOPLASMIC_DOMAIN (PHOBIUS); TRANSMEMBRANE …
TR27536|c4_g1_i1	disco-interacting protein 2 isoform x1	11.8397	3.755e-10	7.65e-08	5947	2	P:biological_process; F:molecular_function	-	IPR010506 (PFAM); IPR000873 (PFAM); G3DSA:3.40.50.980 (GENE3D); G3DSA:2.30.38.10 (GENE3D); G3DSA:3.40.50.980 (GENE3D); PTHR22754 (PANTHER); SSF56801 (SUPERFAMILY); SSF56801 (SUPERFAMILY)
TR42293|c6_g1_i8	lon protease mitochondrial isoform x1	11.4351	3.38e-14	2.225e-11	2989	11	F:peptidase activity; F:ATPase activity; P:response to stress; F:DNA binding; F:ion binding; P:catabolic process; C:mitochondrion; P:protein complex assembly; P:DNA metabolic process; P:mitochondrion organization; P:biosynthetic process	EC:3.4.21	PR00830 (PRINTS); IPR003111 (SMART); IPR003593 (SMART); IPR004815 (PIRSF); IPR003959 (PFAM); IPR014721 (G3DSA:3.30.230.GENE3D); IPR027417 (G3DSA:3.40.50.GENE3D); IPR008269 (PFAM); G3DSA:1.10.8.60 (GENE3D); IPR004815 (TIGRFAM); IPR003111 (PFAM); IPR027065 (PANTHER); PTHR10046:SF50 (PANTHER); PTHR10046:SF50 (PANTHER); IPR027065 (PANTHER); IPR008268 (PROSITE_PATTERNS); IPR020568 (SUPERFAMILY); IPR02…
TR52097|c0_g1_i3	synaptojanin-1 isoform x1	11.1439	2.836e-13	1.8505e-10	2918	2	P:lipid metabolic process; F:molecular_function	EC:3.1	IPR000300 (SMART); IPR015047 (PFAM); IPR005135 (PFAM); IPR005135 (G3DSA:3.60.10.GENE3D); IPR002013 (PFAM); PTHR11200:SF146 (PANTHER); PTHR11200 (PANTHER); IPR002013 (PROSITE_PROFILES); IPR005135 (SUPERFAMILY)
TR16877|c3_g1_i1	hormone receptor 4 isoform x2	11.1417	2.9925e-13	1.9035e-10	1082	0	-		no IPS match
TR30823|c0_g1_i18	zinc finger protein rotund isoform x3	10.982	3.9297e-12	9.3655e-10	1738	1	F:ion binding; F:molecular_function	-	Coil (COILS); Coil (COILS); Coil (COILS); Coil (COILS); IPR015880 (SMART); IPR007087 (PFAM); PF12874 (PFAM); IPR013087 (G3DSA:3.30.160.GENE3D); IPR013087 (G3DSA:3.30.160.GENE3D); IPR013087 (G3DSA:3.30.160.GENE3D); IPR013087 (G3DSA:3.30.160.GENE3D); IPR007087 (PFAM); PTHR24409 (PANTHER); IPR007087 (PROSITE_PATTERNS); IPR007087 (PROSITE_PATTERNS); IPR007087 (PROSITE_PATTERNS); IPR007087 (PROSITE_PA…
TR55124|c1_g1_i1	ryanodine receptor isoform x6	10.9497	2.18054e-11	6.1533e-09	3905	4	P:transmembrane transport; P:homeostatic process; F:transmembrane transporter activity; C:cellular_component; P:transport; C:intracellular	-	IPR011992 (G3DSA:1.10.238.GENE3D); IPR005821 (PFAM); IPR013662 (PFAM); IPR009460 (PFAM); PTHR13715:SF79 (PANTHER); IPR015925 (PANTHER); IPR015925 (PANTHER); NON_CYTOPLASMIC_DOMAIN (PHOBIUS); TRANSMEMBRANE (PHOBIUS); TRANSMEMBRANE (PHOBIUS); TRANSMEMBRANE (PHOBIUS); CYTOPLASMIC_DOMAIN (PHOBIUS); TRANSMEMBRANE (PHOBIUS); NON_CYTOPLASMIC_DOMAIN (PHOBIUS); NON_CYTOPLASMIC_DOMAIN (PHOBIUS); CYTOPLASMI…
TR33886|c0_g1_i1	shootin-1 isoform x1	10.9234	8.715e-13	3.82e-10	1210	0	-		Coil (COILS); Coil (COILS); Coil (COILS); Coil (COILS); Coil (COILS)
TR55070|c8_g1_i6	dynamin isoform x2	10.9068	3.1105e-12	7.91e-10	2335	3	F:ion binding; F:GTPase activity; P:vesicle-mediated transport	-	IPR022812 (PRINTS); IPR001849 (SMART); IPR003130 (SMART); IPR001401 (SMART); IPR000375 (PFAM); IPR001849 (PFAM); IPR022812 (PFAM); IPR011993 (G3DSA:2.30.29.GENE3D); IPR003130 (PFAM); IPR027417 (G3DSA:3.40.50.GENE3D); IPR022812 (PANTHER); IPR027741 (PTHR11566:PANTHER); IPR020850 (PROSITE_PROFILES); IPR030381 (PROSITE_PROFILES); IPR001849 (PROSITE_PROFILES); IPR027417 (SUPERFAMILY); IPR011993 (SUPE…
TR4006|c7_g2_i9	down syndrome cell adhesion molecule-like protein dscam2 isoform x30	10.8775	1.153e-12	4.56e-10	2893	1	F:molecular_function	-	IPR003961 (SMART); IPR003599 (SMART); IPR003598 (SMART); IPR003961 (PFAM); IPR013783 (G3DSA:2.60.40.GENE3D); IPR013783 (G3DSA:2.60.40.GENE3D); IPR013098 (PFAM); IPR013783 (G3DSA:2.60.40.GENE3D); IPR021012 (PFAM); IPR013783 (G3DSA:2.60.40.GENE3D); IPR013783 (G3DSA:2.60.40.GENE3D); PTHR10489:SF525 (PANTHER); PTHR10489 (PANTHER); PTHR10489 (PANTHER); PTHR10489:SF525 (PANTHER); PTHR10489 (PANTHER); T…
TR13038|c0_g3_i4	excitatory amino acid transporter isoform x1	10.8435	3.067e-12	8.345e-10	2444	3	C:cellular_component; P:transport; F:transmembrane transporter activity	-	IPR001991 (PRINTS); IPR001991 (G3DSA:1.10.3860.GENE3D); IPR001991 (PFAM); PTHR11958:SF63 (PANTHER); IPR001991 (PANTHER); IPR018107 (PROSITE_PATTERNS); TRANSMEMBRANE (PHOBIUS); NON_CYTOPLASMIC_DOMAIN (PHOBIUS); NON_CYTOPLASMIC_DOMAIN (PHOBIUS); CYTOPLASMIC_DOMAIN (PHOBIUS); NON_CYTOPLASMIC_DOMAIN (PHOBIUS); CYTOPLASMIC_DOMAIN (PHOBIUS); TRANSMEMBRANE (PHOBIUS); NON_CYTOPLASMIC_DOMAIN (PHOBIUS); TR…
TR42270|c3_g5_i5	calcium-activated potassium channel slowpoke isoform x7	10.7495	8.45191e-11	2.06092e-08	1431	4	C:protein complex; C:plasma membrane; P:transport; F:transmembrane transporter activity; P:transmembrane transport	-	IPR028325 (PRINTS); IPR003929 (PRINTS); G3DSA:1.10.287.70 (GENE3D); IPR016040 (G3DSA:3.40.50.GENE3D); G3DSA:1.10.287.70 (GENE3D); IPR005821 (PFAM); IPR003929 (PFAM); PTHR10027:SF29 (PANTHER); PTHR10027 (PANTHER); CYTOPLASMIC_DOMAIN (PHOBIUS); NON_CYTOPLASMIC_DOMAIN (PHOBIUS); CYTOPLASMIC_DOMAIN (PHOBIUS); NON_CYTOPLASMIC_DOMAIN (PHOBIUS); TRANSMEMBRANE (PHOBIUS); TRANSMEMBRANE (PHOBIUS); NON_CYTO…
TR37837|c6_g1_i2	inorganic phosphate cotransporter isoform x1	10.7438	6.556e-12	2.223e-09	1662	2	C:cellular_component; P:transmembrane transport	-	IPR011701 (PFAM); G3DSA:1.20.1250.20 (GENE3D); G3DSA:1.20.1250.20 (GENE3D); PTHR11662:SF280 (PANTHER); PTHR11662 (PANTHER); TRANSMEMBRANE (PHOBIUS); NON_CYTOPLASMIC_DOMAIN (PHOBIUS); TRANSMEMBRANE (PHOBIUS); NON_CYTOPLASMIC_DOMAIN (PHOBIUS); CYTOPLASMIC_DOMAIN (PHOBIUS); TRANSMEMBRANE (PHOBIUS); TRANSMEMBRANE (PHOBIUS); CYTOPLASMIC_DOMAIN (PHOBIUS); CYTOPLASMIC_DOMAIN (PHOBIUS); NON_CYTOPLASMIC_D…
TR18782|c1_g2_i1	serine arginine repetitive matrix protein 2 isoform x2	10.7371	4.28e-12	1.569e-09	597	0	-		no IPS match
TR28738|c0_g3_i2	embryonic polarity protein dorsal-like isoform x3	10.6646	4.77e-12	1.455e-09	1470	11	P:cell communication; C:integral to membrane; C:membrane; F:sequence-specific DNA binding transcription factor activity; C:nucleus; C:cytoplasm; P:Notch signaling pathway; P:multicellular organismal development; P:regulation of transcription, DNA-dependent; F:calcium ion binding; P:regulation of transcription from RNA polymerase II promoter		NON_CYTOPLASMIC_DOMAIN (PHOBIUS); CYTOPLASMIC_DOMAIN (PHOBIUS); TRANSMEMBRANE (PHOBIUS); TMhelix (TMHMM)
TR20185|c0_g1_i1	transposable element p transposase	10.6443	1.0865e-11	3.529e-09	2535	2	F:nucleic acid binding; F:protein dimerization activity		IPR021896 (PFAM); PTHR10725 (PANTHER)
TR29865|c1_g2_i1	cordon-bleu 1	10.5746	2.74059e-10	5.8524e-08	600	5	P:intracellular signal transduction; F:receptor signaling protein activity; F:actin binding; P:signal transduction; C:intracellular		TRANSMEMBRANE (PHOBIUS); NON_CYTOPLASMIC_DOMAIN (PHOBIUS); CYTOPLASMIC_DOMAIN (PHOBIUS)
TR6355|c0_g4_i1	PREDICTED: uncharacterized protein LOC100875083 isoform X7	10.5246	1.9025e-11	4.33e-09	670	0	-		SignalP-TM (SIGNALP_GRAM_POSITIVE)
TR24635|c2_g2_i3	zinc finger cchc domain-containing protein 4	10.4805	6.0905e-11	1.16105e-08	1103	1	F:molecular_function; F:ion binding	-	IPR001878 (SMART); PTHR13493 (PANTHER); PTHR13493:SF3 (PANTHER); IPR001594 (PROSITE_PROFILES); IPR017921 (PROSITE_PROFILES); IPR001878 (PROSITE_PROFILES); SSF161245 (SUPERFAMILY)
TR4447|c3_g2_i2	probable helicase senataxin	10.4261	1.21405e-10	2.08605e-08	1599	0	-		PF13086 (PFAM); IPR027417 (G3DSA:3.40.50.GENE3D); PF13087 (PFAM); PTHR10887 (PANTHER); IPR027417 (SUPERFAMILY)
TR3945|c7_g1_i2	PREDICTED: uncharacterized protein LOC107036696 isoform X3	10.3631	5.47e-11	1.375e-08	1667	0	-		Coil (COILS); Coil (COILS); Coil (COILS); Coil (COILS); Coil (COILS); PTHR21740:SF0 (PANTHER); IPR026163 (PANTHER)
TR16911|c9_g1_i6	dynein heavy cytoplasmic isoform x2	10.2602	2.045e-08	2.65502e-06	3872	5	P:biological_process; F:ATPase activity; F:ion binding; F:molecular_function; C:cytoskeleton; C:protein complex	EC:3.6.1.3	Coil (COILS); IPR003593 (SMART); PF12775 (PFAM); IPR027417 (G3DSA:3.40.50.GENE3D); IPR011704 (PFAM); IPR027417 (G3DSA:3.40.50.GENE3D); IPR024317 (PFAM); IPR024743 (PFAM); PTHR10676:SF28 (PANTHER); PTHR10676:SF28 (PANTHER); IPR026983 (PANTHER); IPR026983 (PANTHER); IPR026983 (PANTHER); IPR027417 (SUPERFAMILY); IPR027417 (SUPERFAMILY); IPR027417 (SUPERFAMILY)
TR34068|c0_g1_i1	serine arginine repetitive matrix protein 1-like isoform x1	10.2417	7.115e-11	1.565e-08	861	0	-		Coil (COILS)
TR19336|c1_g1_i6	PREDICTED: uncharacterized protein LOC100740589 isoform X3	10.1827	3.725e-07	3.515e-05	4368	1	F:molecular_function	-	IPR015425 (SMART); IPR015425 (PFAM); PTHR23213:SF184 (PANTHER); PTHR23213 (PANTHER); IPR015425 (PROSITE_PROFILES); IPR014768 (PROSITE_PROFILES); IPR016024 (SUPERFAMILY); SSF101447 (SUPERFAMILY)
TR8499|c8_g1_i3	netrin receptor unc5c	10.1312	1.225e-06	9.74795e-05	3422	2	F:molecular_function; P:signal transduction	-	IPR003599 (SMART); IPR000906 (SMART); IPR000488 (SMART); IPR003598 (SMART); IPR000884 (SMART); IPR013098 (PFAM); IPR013783 (G3DSA:2.60.40.GENE3D); IPR011029 (G3DSA:1.10.533.GENE3D); IPR000906 (PFAM); IPR000488 (PFAM); G3DSA:2.20.100.10 (GENE3D); IPR013783 (G3DSA:2.60.40.GENE3D); IPR000884 (PFAM); PTHR12582:SF41 (PANTHER); PTHR12582 (PANTHER); PTHR12582:SF41 (PANTHER); PTHR12582 (PANTHER); PTHR125…
TR8996|c0_g1_i1	hypothetical protein RF55_15660	9.99723	2.595e-06	0.000188984	3571	4	F:nuclease activity; F:DNA binding; F:peptidase activity; P:biological_process	EC:3.1; EC:3.4	IPR019080 (PFAM); IPR011604 (G3DSA:3.90.320.GENE3D); IPR003653 (PFAM); SSF54001 (SUPERFAMILY); IPR011335 (SUPERFAMILY)
TR32856|c3_g1_i1	zinc finger protein ush	9.95897	1.5178e-09	1.865e-07	859	1	F:molecular_function	-	IPR015880 (SMART); IPR013087 (G3DSA:3.30.160.GENE3D); PTHR12958 (PANTHER); PTHR12958:SF3 (PANTHER); SSF57667 (SUPERFAMILY); SSF57667 (SUPERFAMILY); SSF57667 (SUPERFAMILY)
TR16604|c2_g1_i1	PREDICTED: uncharacterized protein LOC103316157	9.94619	5.08e-10	9.81e-08	1623	0	-		PTHR11514:SF28 (PANTHER); PTHR11514 (PANTHER); PTHR11514:SF28 (PANTHER); PTHR11514 (PANTHER)
TR15724|c0_g4_i1	sister chromatid cohesion protein pds5 homolog b isoform x1	9.87019	1.225e-06	7.63193e-05	1210	0	-		PTHR12663 (PANTHER); PTHR12663:SF0 (PANTHER)
TR16867|c0_g1_i3	protein abnormal spindle	9.82294	3.6045e-09	5.7675e-07	1936	1	P:spindle organization		SignalP-noTM (SIGNALP_EUK)
TR41982|c0_g1_i1	endothelin-converting enzyme 1-like	9.75363	6.0475e-09	6.43e-07	1211	2	P:biological_process; F:peptidase activity	EC:3.4.24	IPR018497 (PRINTS); IPR024079 (G3DSA:3.40.390.GENE3D); IPR018497 (PFAM); IPR008753 (PFAM); IPR000718 (PANTHER); SSF55486 (SUPERFAMILY)
TR1488|c10_g3_i2	fasciclin-1 isoform x2	9.71683	1.225e-06	9.74796e-05	2969	0	-		IPR000782 (SMART); IPR000782 (PFAM); IPR000782 (G3DSA:2.30.180.GENE3D); PTHR10900 (PANTHER); PTHR10900:SF80 (PANTHER); SIGNAL_PEPTIDE_C_REGION (PHOBIUS); SIGNAL_PEPTIDE (PHOBIUS); NON_CYTOPLASMIC_DOMAIN (PHOBIUS); SIGNAL_PEPTIDE_N_REGION (PHOBIUS); SIGNAL_PEPTIDE_H_REGION (PHOBIUS); IPR000782 (PROSITE_PROFILES); IPR000782 (PROSITE_PROFILES); IPR000782 (PROSITE_PROFILES); IPR000782 (PROSITE_PROFIL…
TR9014|c11_g1_i1	fit family protein cg10671	9.627	4.32525e-08	3.808e-06	878	2	C:endoplasmic reticulum; P:biological_process	-	IPR019388 (PFAM); PTHR23129:SF0 (PANTHER); IPR019388 (PANTHER); TRANSMEMBRANE (PHOBIUS); CYTOPLASMIC_DOMAIN (PHOBIUS); NON_CYTOPLASMIC_DOMAIN (PHOBIUS); CYTOPLASMIC_DOMAIN (PHOBIUS); TRANSMEMBRANE (PHOBIUS); TRANSMEMBRANE (PHOBIUS); TRANSMEMBRANE (PHOBIUS); NON_CYTOPLASMIC_DOMAIN (PHOBIUS); NON_CYTOPLASMIC_DOMAIN (PHOBIUS); CYTOPLASMIC_DOMAIN (PHOBIUS); TRANSMEMBRANE (PHOBIUS); TMhelix (TMHMM); T…
TR43931|c0_g1_i1	PREDICTED: uncharacterized protein LOC105268841	9.48086	0.00010898	0.00451182	2118	0	-		no IPS match
TR37907|c8_g1_i10	glutamate receptor kainate 2 isoform x3	9.43657	2.33105e-07	2.33685e-05	3166	6	P:transport; C:cellular_component; F:signal transducer activity; F:transmembrane transporter activity; P:signal transduction; P:cell-cell signaling	-	IPR001508 (PRINTS); IPR019594 (SMART); IPR001320 (SMART); G3DSA:3.40.50.2300 (GENE3D); IPR019594 (PFAM); G3DSA:3.40.190.10 (GENE3D); IPR001320 (PFAM); G3DSA:1.10.287.70 (GENE3D); IPR001828 (PFAM); G3DSA:3.40.50.2300 (GENE3D); PTHR18966 (PANTHER); PTHR18966:SF185 (PANTHER); CYTOPLASMIC_DOMAIN (PHOBIUS); TRANSMEMBRANE (PHOBIUS); NON_CYTOPLASMIC_DOMAIN (PHOBIUS); TRANSMEMBRANE (PHOBIUS); CYTOPLASMIC…
TR33228|c3_g1_i3	autophagy-related protein 2 homolog b	9.17366	5.26e-08	5.845e-06	1111	0	-		no IPS match
TR45475|c0_g2_i1	ras-related protein m-ras-like	9.14368	1.0615e-07	9.12e-06	1530	4	F:ion binding; C:intracellular; C:cellular_component; P:signal transduction; P:transport	-	PR00449 (PRINTS); SM00175 (SMART); SM00174 (SMART); SM00173 (SMART); IPR027417 (G3DSA:3.40.50.GENE3D); IPR001806 (PFAM); IPR005225 (TIGRFAM); PTHR24070:SF268 (PANTHER); IPR020849 (PANTHER); IPR020849 (PROSITE_PROFILES); IPR027417 (SUPERFAMILY)
TR29789|c0_g3_i1	at-rich interactive domain-containing protein 5b-like isoform x2	9.11749	1.098e-07	9.55e-06	539	4	P:cellular nitrogen compound metabolic process; P:biosynthetic process; C:nucleus; F:DNA binding	-	PTHR13964 (PANTHER); IPR030408 (PTHR13964:PANTHER)
TR49021|c3_g3_i16	collagen alpha chain cg42342 isoform x4	9.11665	2.066e-07	2.1275e-05	2783	0	-		IPR008160 (PFAM); PTHR24023 (PANTHER); TRANSMEMBRANE (PHOBIUS); NON_CYTOPLASMIC_DOMAIN (PHOBIUS); CYTOPLASMIC_DOMAIN (PHOBIUS); TMhelix (TMHMM)
TR23225|c0_g2_i1	serine threonine-protein kinase ick-like isoform x1	9.08278	1.22636e-06	9.7644e-05	1549	3	F:kinase activity; P:cellular protein modification process; F:ion binding	-	IPR002290 (SMART); G3DSA:1.10.510.10 (GENE3D); G3DSA:3.30.200.20 (GENE3D); IPR000719 (PFAM); PTHR24055 (PANTHER); PTHR24055:SF194 (PANTHER); IPR008271 (PROSITE_PATTERNS); IPR017441 (PROSITE_PATTERNS); IPR000719 (PROSITE_PROFILES); IPR011009 (SUPERFAMILY)
TR8964|c0_g1_i1	60s ribosomal protein l14	9.03891	1.02738e-06	6.63588e-05	495	1	C:intracellular	-	no IPS match
TR16604|c1_g1_i1	PREDICTED: uncharacterized protein LOC103571862	8.94594	2.045e-07	2.0735e-05	1105	0	-		PTHR11514:SF60 (PANTHER); PTHR11514 (PANTHER); CYTOPLASMIC_DOMAIN (PHOBIUS); NON_CYTOPLASMIC_DOMAIN (PHOBIUS); TRANSMEMBRANE (PHOBIUS); TRANSMEMBRANE (PHOBIUS); NON_CYTOPLASMIC_DOMAIN (PHOBIUS); TMhelix (TMHMM)
TR41866|c0_g1_i13	PREDICTED: uncharacterized protein LOC105264479 isoform X3	8.92478	2.26502e-05	0.00121883	1425	0	-		IPR024810 (SMART); IPR024810 (PFAM); PTHR10656:SF32 (PANTHER); PTHR10656 (PANTHER)
TR12604|c0_g1_i4	nuclease harbi1	8.88143	1.78505e-05	0.000980943	1395	0	-		IPR027806 (PFAM); PTHR22930 (PANTHER); PTHR22930:SF6 (PANTHER)
TR31987|c0_g1_i1	zinc finger bed domain-containing protein 1-like	8.87172	3.45e-07	2.84e-05	976	1	F:DNA binding	-	IPR025525 (PFAM); PTHR23272 (PANTHER); PTHR23272:SF42 (PANTHER); IPR012337 (SUPERFAMILY)
TR42306|c0_g2_i4	geranylgeranyl transferase type-2 subunit alpha	8.78981	5.495e-07	4.89e-05	1460	4	F:transferase activity, transferring alkyl or aryl (other than methyl) groups; P:cellular protein modification process; C:cytoplasm; C:protein complex	EC:2.5.1	IPR002088 (PFAM); G3DSA:1.25.40.120 (GENE3D); PTHR11129 (PANTHER); IPR032955 (PTHR11129:PANTHER); IPR002088 (PROSITE_PROFILES); IPR002088 (PROSITE_PROFILES); IPR002088 (PROSITE_PROFILES); IPR002088 (PROSITE_PROFILES); SSF48439 (SUPERFAMILY)
TR32874|c2_g4_i2	without calmodulin-like domain	8.70968	3.19345e-06	0.000178298	778	13	P:vesicle-mediated transport; P:aging; P:cellular nitrogen compound metabolic process; P:biosynthetic process; P:signal transduction; P:anatomical structure development; C:cytoskeleton; F:ion binding; P:response to stress; C:cytoplasm; P:cytoskeleton organization; P:protein maturation; C:cell; F:peptidase activity	-	IPR022684 (PRINTS); IPR001300 (SMART); IPR001300 (PFAM); PTHR10183 (PANTHER); PTHR10183:SF310 (PANTHER); SIGNAL_PEPTIDE_C_REGION (PHOBIUS); NON_CYTOPLASMIC_DOMAIN (PHOBIUS); SIGNAL_PEPTIDE_N_REGION (PHOBIUS); SIGNAL_PEPTIDE_H_REGION (PHOBIUS); SIGNAL_PEPTIDE (PHOBIUS); IPR001300 (PROSITE_PROFILES); SignalP-noTM (SIGNALP_EUK); SignalP-TM (SIGNALP_GRAM_POSITIVE); SSF54001 (SUPERFAMILY)
TR17775|c0_g2_i1	protein krtcap2 homolog	8.51967	6.27872e-05	0.00283304	581	0	-		IPR018614 (PFAM); PTHR32001 (PANTHER); TRANSMEMBRANE (PHOBIUS); NON_CYTOPLASMIC_DOMAIN (PHOBIUS); CYTOPLASMIC_DOMAIN (PHOBIUS); TRANSMEMBRANE (PHOBIUS); NON_CYTOPLASMIC_DOMAIN (PHOBIUS); TRANSMEMBRANE (PHOBIUS); CYTOPLASMIC_DOMAIN (PHOBIUS); TMhelix (TMHMM); TMhelix (TMHMM); TMhelix (TMHMM); TMhelix (TMHMM)
TR32736|c2_g1_i8	gamma-tubulin complex component 4	8.4894	2.2688e-05	0.00122218	1443	2	C:cytoskeleton; P:cytoskeleton organization; C:microtubule organizing center	-	IPR007259 (PFAM); CYTOPLASMIC_DOMAIN (PHOBIUS); TRANSMEMBRANE (PHOBIUS); NON_CYTOPLASMIC_DOMAIN (PHOBIUS); TMhelix (TMHMM)
TR27543|c0_g2_i3	recq-mediated genome instability protein 1-like	8.48636	2.495e-06	0.000173237	1880	1	F:molecular_function	-	IPR032199 (PFAM); PTHR14790 (PANTHER); PTHR14790:SF15 (PANTHER)
TR27515|c1_g2_i2	protein lap4 isoform x3	8.4614	2.695e-06	0.00019066	395	0	-		NON_CYTOPLASMIC_DOMAIN (PHOBIUS); SIGNAL_PEPTIDE_N_REGION (PHOBIUS); SIGNAL_PEPTIDE_C_REGION (PHOBIUS); SIGNAL_PEPTIDE (PHOBIUS); SIGNAL_PEPTIDE_H_REGION (PHOBIUS)
TR49565|c0_g1_i1	calpain- partial	8.37308	1.15215e-05	0.000669006	450	3	P:biological_process; C:intracellular; F:peptidase activity	-	G3DSA:3.90.70.10 (GENE3D); IPR001300 (PFAM); PTHR10183:SF310 (PANTHER); PTHR10183 (PANTHER); IPR001300 (PROSITE_PROFILES); SSF54001 (SUPERFAMILY)
TR32720|c1_g1_i3	glycerol kinase-like isoform x2	8.36422	6.575e-06	0.00035067	832	2	F:molecular_function; P:carbohydrate metabolic process	-	G3DSA:3.30.420.40 (GENE3D); IPR018485 (PFAM); PTHR10196:SF40 (PANTHER); PTHR10196 (PANTHER); IPR018483 (PROSITE_PATTERNS); SSF53067 (SUPERFAMILY)
TR13679|c3_g1_i1	PREDICTED: uncharacterized protein LOC103316061	8.21888	8.6e-06	0.000512524	686	0	-		PTHR33053 (PANTHER); PTHR33053:SF3 (PANTHER)
TR52598|c0_g1_i1	kinesin-like protein kif18a	8.18655	1.111e-05	0.00066286	1191	5	F:cytoskeletal protein binding; P:biological_process; F:ion binding; C:cytoskeleton; C:protein complex; F:molecular_function	-	IPR001752 (PRINTS); IPR001752 (SMART); IPR001752 (PFAM); IPR001752 (G3DSA:3.40.850.GENE3D); IPR027640 (PANTHER); PTHR24115:SF81 (PANTHER); IPR001752 (PROSITE_PROFILES); IPR027417 (SUPERFAMILY)
TR19502|c0_g1_i1	transcription factor hivep3 isoform x1	8.16561	1.286e-05	0.00069545	1026	1	F:molecular_function; F:ion binding	-	IPR015880 (SMART); IPR013087 (G3DSA:3.30.160.GENE3D); IPR007087 (PROSITE_PATTERNS); IPR007087 (PROSITE_PROFILES); SSF57667 (SUPERFAMILY)
TR2857|c0_g1_i1	mitochondrial import inner membrane translocase subunit tim17-b-like	8.16457	1.3845e-05	0.000705303	399	6	C:protein complex; C:mitochondrion; F:protein transporter activity; F:transmembrane transporter activity; P:transport; C:plastid	-	IPR003397 (PFAM); PTHR10485:SF0 (PANTHER); IPR005678 (PANTHER); TMhelix (TMHMM)
TR8542|c0_g2_i1	semaphorin 2a	8.15565	6.7e-10	8.45001e-08	1823	1	F:molecular_function	-	IPR001627 (SMART); IPR015943 (G3DSA:2.130.10.GENE3D); IPR001627 (PFAM); PTHR11036:SF82 (PANTHER); IPR027231 (PANTHER); PTHR11036:SF82 (PANTHER); IPR027231 (PANTHER); IPR001627 (PROSITE_PROFILES); IPR001627 (SUPERFAMILY)
TR5631|c7_g1_i4	thap domain-containing protein 2-like isoform x1	8.12652	4.9225e-05	0.00192186	1548	1	F:molecular_function	-	IPR006612 (SMART); IPR006612 (PFAM); IPR006612 (PROSITE_PROFILES); SSF57716 (SUPERFAMILY)
TR40177|c0_g1_i1	hrp65 protein isoform x2	8.07265	1.71e-05	0.000937951	561	1	F:molecular_function	-	IPR000504 (SMART); IPR012677 (G3DSA:3.30.70.GENE3D); IPR000504 (PFAM); PTHR23189 (PANTHER); PTHR23189:SF51 (PANTHER); IPR000504 (PROSITE_PROFILES); IPR012677 (SUPERFAMILY)
TR16397|c0_g1_i1	mitochondrial import inner membrane translocase subunit tim17-b-like	8.05056	2.135e-05	0.00109077	337	6	P:transport; F:protein transporter activity; F:transmembrane transporter activity; C:protein complex; C:mitochondrion; C:plastid	-	IPR005678 (PANTHER)
TR8245|c0_g2_i3	phosphotriesterase-related protein	8.03922	2.37e-05	0.00126977	980	2	F:ion binding; P:catabolic process	-	IPR001559 (PFAM); G3DSA:3.20.20.140 (GENE3D); IPR001559 (PANTHER); PTHR10819:SF3 (PANTHER); IPR001559 (PROSITE_PROFILES); IPR032466 (SUPERFAMILY)
TR18829|c4_g3_i1	slit homolog 3 protein	7.87337	8.71394e-05	0.00312145	1981	1	F:molecular_function	-	IPR003591 (SMART); SM00364 (SMART); SM00365 (SMART); IPR032675 (G3DSA:3.80.10.GENE3D); IPR032675 (G3DSA:3.80.10.GENE3D); IPR032675 (G3DSA:3.80.10.GENE3D); IPR032675 (G3DSA:3.80.10.GENE3D); IPR001611 (PFAM); IPR001611 (PFAM); IPR032675 (G3DSA:3.80.10.GENE3D); PTHR24365 (PANTHER); PTHR24365:SF249 (PANTHER); PTHR24365:SF249 (PANTHER); PTHR24365 (PANTHER); SIGNAL_PEPTIDE_C_REGION (PHOBIUS); SIGNAL_PE…
TR28349|c1_g1_i2	zinc finger cchc-type and rna-binding motif-containing protein 1-like	7.84387	6.23e-05	0.0029441	522	0	-		no IPS match
TR49164|c0_g1_i1	protein ptcd3 mitochondrial	7.74049	0.000156557	0.00513413	476	0	-		IPR033443 (PFAM); IPR002885 (TIGRFAM); PTHR16276:SF1 (PANTHER); PTHR16276 (PANTHER)
TR39089|c1_g1_i1	nuclear valosin-containing	7.73854	1.785e-14	2.155e-11	5220	1	F:molecular_function	-	IPR005135 (G3DSA:3.60.10.GENE3D); IPR005135 (PFAM); IPR000477 (PFAM); PTHR19446 (PANTHER); TRANSMEMBRANE (PHOBIUS); NON_CYTOPLASMIC_DOMAIN (PHOBIUS); CYTOPLASMIC_DOMAIN (PHOBIUS); IPR000477 (PROSITE_PROFILES); IPR005135 (SUPERFAMILY); SSF56672 (SUPERFAMILY)
TR7405|c1_g1_i4	protein singed wings 2	7.63516	0.000182557	0.00636996	1544	1	F:molecular_function	-	IPR032675 (G3DSA:3.80.10.GENE3D); TRANSMEMBRANE (PHOBIUS); CYTOPLASMIC_DOMAIN (PHOBIUS); NON_CYTOPLASMIC_DOMAIN (PHOBIUS); IPR001611 (PROSITE_PROFILES); IPR001611 (PROSITE_PROFILES); IPR001611 (PROSITE_PROFILES); IPR032675 (SUPERFAMILY); TMhelix (TMHMM)
TR1545|c0_g1_i1	gag-like protein	7.43375	1.13504e-10	1.94056e-08	1301	1	F:ion binding; F:molecular_function	-	Coil (COILS); IPR001878 (G3DSA:4.10.60.GENE3D); IPR001878 (SUPERFAMILY)
TR31645|c2_g1_i9	membrane metallo-endopeptidase-like 1 isoform x3	7.29639	1.0451e-11	3.34086e-09	1275	2	P:biological_process; F:peptidase activity	EC:3.4.24	IPR018497 (PRINTS); IPR018497 (PFAM); IPR008753 (PFAM); IPR024079 (G3DSA:3.40.390.GENE3D); IPR000718 (PANTHER); SSF55486 (SUPERFAMILY)
TR45157|c3_g1_i1	low quality protein: at-rich interactive domain-containing protein 4b	7.16515	3.77646e-13	2.1868e-10	2934	1	F:DNA binding		Coil (COILS); Coil (COILS); Coil (COILS)
TR27454|c0_g1_i1	cuticle protein 2-like	6.87252	3.35e-09	5.45e-07	935	0	-		TMhelix (TMHMM)
TR53233|c0_g1_i1	tetra-peptide repeat homeobox protein 1-like	6.5882	1.89e-09	3.325e-07	878	0	-		SIGNAL_PEPTIDE (PHOBIUS); SIGNAL_PEPTIDE_C_REGION (PHOBIUS); NON_CYTOPLASMIC_DOMAIN (PHOBIUS); SIGNAL_PEPTIDE_H_REGION (PHOBIUS); SIGNAL_PEPTIDE_N_REGION (PHOBIUS); SignalP-noTM (SIGNALP_EUK); TMhelix (TMHMM)
TR6201|c3_g11_i3	PREDICTED: uncharacterized protein LOC107040391	6.10038	2.56032e-07	1.91085e-05	939	0	-		no IPS match
TR8503|c3_g2_i1	PREDICTED: uncharacterized protein LOC107043304	6.06583	4.967e-10	9.765e-08	1843	0	-		Coil (COILS); Coil (COILS); IPR025254 (PFAM)
TR19320|c1_g3_i3	methyltransferase-like protein 16 homolog	6.01136	4.74239e-06	0.000318523	1314	1	F:methyltransferase activity	-	Coil (COILS); IPR010286 (PFAM); PTHR13393:SF0 (PANTHER); IPR010286 (PANTHER)
TR28801|c0_g1_i2	speckle-type poz	6.00015	3.71e-07	3.51501e-05	1146	1	F:molecular_function	-	IPR000210 (SMART); G3DSA:3.30.710.10 (GENE3D); IPR000210 (PFAM); PTHR24413 (PANTHER); IPR002083 (PROSITE_PROFILES); IPR000210 (PROSITE_PROFILES); IPR011333 (SUPERFAMILY); IPR008974 (SUPERFAMILY)
TR20498|c2_g1_i1	PREDICTED: uncharacterized protein LOC105571058, partial	5.92533	1.42505e-06	8.73943e-05	792	0	-		PTHR33053:SF3 (PANTHER); PTHR33053 (PANTHER)
TR13679|c5_g1_i1	hypothetical protein X777_08139, partial	5.91457	5.99e-07	4.515e-05	1022	0	-		PTHR33053:SF3 (PANTHER); PTHR33053 (PANTHER)
TR19258|c0_g1_i1	dirigent protein 10-like	5.80466	2e-10	4.43005e-08	927	0	-		CYTOPLASMIC_DOMAIN (PHOBIUS); NON_CYTOPLASMIC_DOMAIN (PHOBIUS); TRANSMEMBRANE (PHOBIUS); TMhelix (TMHMM); TMhelix (TMHMM)
TR27559|c2_g1_i9	rho gtpase-activating protein 190 isoform x5	5.57639	4.65e-11	9.715e-09	5068	3	C:cellular_component; F:ion binding; P:signal transduction	-	Coil (COILS); IPR000198 (SMART); IPR020849 (SMART); IPR000198 (PFAM); IPR000198 (G3DSA:1.10.555.GENE3D); IPR027417 (G3DSA:3.40.50.GENE3D); IPR032835 (PFAM); IPR001806 (PFAM); PTHR23175:SF4 (PANTHER); PTHR23175:SF4 (PANTHER); PTHR23175:SF4 (PANTHER); PTHR23175 (PANTHER); PTHR23175 (PANTHER); PTHR23175 (PANTHER); IPR002713 (PROSITE_PROFILES); IPR002713 (PROSITE_PROFILES); IPR000198 (PROSITE_PROFILE…
TR53205|c0_g1_i2	zinc finger bed domain-containing protein ricesleeper 2-like	5.47542	1.1472e-07	1.25485e-05	1679	1	F:molecular_function	-	IPR008906 (PFAM); PTHR23272 (PANTHER); IPR012337 (SUPERFAMILY)
TR42273|c0_g2_i2	nuclease harbi1	5.46476	6.37485e-09	6.719e-07	1686	0	-		IPR026103 (PRINTS); IPR027806 (PFAM); PTHR22930 (PANTHER)
TR44307|c0_g2_i1	PREDICTED: uncharacterized protein LOC105687462	5.38766	4.93e-05	0.00235798	3256	1	F:ion binding	-	IPR015880 (SMART); PTHR31912:SF16 (PANTHER); PTHR31912 (PANTHER); IPR007087 (PROSITE_PATTERNS)
TR50852|c0_g1_i1	nadh dehydrogenase subunit 1	5.3827	2.71175e-10	3.97035e-08	1059	8	C:mitochondrion; F:oxidoreductase activity; C:cellular_component; P:generation of precursor metabolites and energy; P:small molecule metabolic process; P:cellular nitrogen compound metabolic process; P:biosynthetic process; P:cofactor metabolic process; P:transport	EC:1.6.5.3	no IPS match
TR48847|c2_g1_i1	transcription initiation factor tfiid subunit partial	5.34993	1.114e-05	0.000588379	424	1	F:molecular_function	-	Coil (COILS); IPR001487 (PRINTS); IPR001487 (SMART); IPR001487 (G3DSA:1.20.920.GENE3D); IPR001487 (PFAM); PTHR13900 (PANTHER); IPR018359 (PROSITE_PATTERNS); IPR001487 (PROSITE_PROFILES); IPR001487 (SUPERFAMILY)
TR37580|c5_g1_i3	serrate rna effector molecule homolog isoform x2	5.31624	5.96785e-05	0.00277706	2481	1	F:molecular_function	-	IPR012677 (G3DSA:3.30.70.GENE3D); IPR007042 (PFAM); PTHR13165:SF0 (PANTHER); PTHR13165 (PANTHER); IPR012677 (SUPERFAMILY)
TR4447|c4_g2_i7	cop9 signalosome complex subunit 7b	5.03562	3.33e-06	0.000222641	447	0	-		no IPS match
TR41810|c12_g5_i6	vinculin isoform x5	5.01965	4.4795e-10	9.003e-08	3722	4	P:cell adhesion; F:cytoskeletal protein binding; F:structural molecule activity; C:cytoskeleton	-	PR00806 (PRINTS); G3DSA:1.20.120.230 (GENE3D); G3DSA:1.20.120.230 (GENE3D); G3DSA:1.20.120.230 (GENE3D); G3DSA:1.20.120.230 (GENE3D); IPR006077 (PFAM); G3DSA:1.20.1490.10 (GENE3D); PTHR18914:SF1 (PANTHER); IPR006077 (PANTHER); PTHR18914:SF1 (PANTHER); IPR006077 (PANTHER); PTHR18914:SF1 (PANTHER); IPR006077 (PANTHER); IPR000633 (PROSITE_PATTERNS); IPR006077 (SUPERFAMILY); IPR006077 (SUPERFAMILY); …
TR33233|c1_g1_i3	f-box lrr-repeat protein 7-like	5.00578	4.49067e-08	5.35143e-06	1713	0	-		IPR032675 (G3DSA:3.80.10.GENE3D); SSF52047 (SUPERFAMILY)
TR52622|c0_g2_i2	heat repeat-containing protein 1	4.94445	9.13995e-05	0.0033518	604	0	-		PTHR13457 (PANTHER); PTHR13457:SF2 (PANTHER)
TR47663|c0_g3_i1	zinc transporter zip3	4.87136	9.17306e-05	0.00402055	377	3	C:cellular_component; P:transport; P:transmembrane transport; F:transmembrane transporter activity	-	IPR003689 (PFAM); PTHR11040:SF77 (PANTHER); PTHR11040 (PANTHER); TRANSMEMBRANE (PHOBIUS); NON_CYTOPLASMIC_DOMAIN (PHOBIUS); NON_CYTOPLASMIC_DOMAIN (PHOBIUS); TRANSMEMBRANE (PHOBIUS); CYTOPLASMIC_DOMAIN (PHOBIUS); TRANSMEMBRANE (PHOBIUS); CYTOPLASMIC_DOMAIN (PHOBIUS); TMhelix (TMHMM); TMhelix (TMHMM); TMhelix (TMHMM)
TR53794|c0_g5_i2	PREDICTED: uncharacterized protein LOC107043281	4.81175	2.0045e-07	2.09905e-05	682	0	-		no IPS match
TR31589|c1_g1_i1	microtubule-associated protein futsch-like isoform x7	4.79372	4.515e-07	3.16502e-05	5024	2	P:signal transduction; F:molecular_function	-	Coil (COILS); IPR000488 (SMART); IPR000906 (SMART); IPR000906 (PFAM); IPR000488 (PFAM); IPR011029 (G3DSA:1.10.533.GENE3D); PTHR24123 (PANTHER); IPR000906 (PROSITE_PROFILES); IPR000488 (PROSITE_PROFILES); IPR011029 (SUPERFAMILY)
TR31789|c1_g1_i3	metal transporter cnnm4 isoform x2	4.78716	1.18515e-06	7.67591e-05	1699	0	-		IPR002550 (PFAM); PTHR12064:SF34 (PANTHER); PTHR12064 (PANTHER); SIGNAL_PEPTIDE_N_REGION (PHOBIUS); CYTOPLASMIC_DOMAIN (PHOBIUS); SIGNAL_PEPTIDE_C_REGION (PHOBIUS); SIGNAL_PEPTIDE (PHOBIUS); NON_CYTOPLASMIC_DOMAIN (PHOBIUS); TRANSMEMBRANE (PHOBIUS); TRANSMEMBRANE (PHOBIUS); CYTOPLASMIC_DOMAIN (PHOBIUS); SIGNAL_PEPTIDE_H_REGION (PHOBIUS); NON_CYTOPLASMIC_DOMAIN (PHOBIUS); TRANSMEMBRANE (PHOBIUS); …
TR16817|c1_g4_i1	dep domain-containing protein 5- partial	4.70948	2.46053e-05	0.00130805	1822	1	P:signal transduction	-	IPR000591 (SMART); IPR011991 (G3DSA:1.10.10.GENE3D); IPR000591 (PFAM); IPR027244 (PANTHER); CYTOPLASMIC_DOMAIN (PHOBIUS); NON_CYTOPLASMIC_DOMAIN (PHOBIUS); TRANSMEMBRANE (PHOBIUS); IPR000591 (PROSITE_PROFILES); IPR011991 (SUPERFAMILY)
TR50321|c8_g1_i4	troponin i-like isoform x6	4.66191	1.6305e-09	2.903e-07	826	3	C:cytoskeleton; C:cytoplasm; C:protein complex	-	TRANSMEMBRANE (PHOBIUS); NON_CYTOPLASMIC_DOMAIN (PHOBIUS); CYTOPLASMIC_DOMAIN (PHOBIUS); TMhelix (TMHMM)
TR36603|c0_g1_i1	rna-directed dna polymerase from mobile element jockey	4.64398	1.04098e-05	0.000487902	1349	0	-		IPR005135 (G3DSA:3.60.10.GENE3D); IPR005135 (PFAM); IPR005135 (SUPERFAMILY)
TR37875|c1_g1_i2	hypothetical protein EAI_04380	4.63915	5.316e-06	0.00029027	855	0	-		IPR031993 (PFAM)
TR32122|c0_g1_i1	vitellogenin receptor-like	4.55368	6.63e-06	0.000430149	1024	1	F:molecular_function	-	IPR002172 (PRINTS); IPR002172 (SMART); IPR002172 (G3DSA:4.10.400.GENE3D); IPR002172 (G3DSA:4.10.400.GENE3D); IPR002172 (PFAM); IPR002172 (G3DSA:4.10.400.GENE3D); IPR002172 (G3DSA:4.10.400.GENE3D); PTHR10529 (PANTHER); PTHR10529:SF212 (PANTHER); IPR023415 (PROSITE_PATTERNS); IPR023415 (PROSITE_PATTERNS); IPR023415 (PROSITE_PATTERNS); IPR002172 (PROSITE_PROFILES); IPR002172 (PROSITE_PROFILES); IPR0…
TR28801|c0_g2_i6	protein roadkill isoform x3	4.55335	5.65066e-07	5.11062e-05	1186	1	F:molecular_function	-	IPR000210 (SMART); IPR000210 (PFAM); G3DSA:3.30.710.10 (GENE3D); PTHR26379 (PANTHER); IPR002083 (PROSITE_PROFILES); IPR000210 (PROSITE_PROFILES); IPR011333 (SUPERFAMILY); IPR008974 (SUPERFAMILY)
TR53220|c1_g1_i4	lysine-specific histone demethylase 1a	4.55094	8.669e-06	0.000538496	2937	2	F:molecular_function; P:biological_process; F:oxidoreductase activity	-	Coil (COILS); Coil (COILS); IPR002937 (PFAM); G3DSA:1.10.287.80 (GENE3D); G3DSA:3.90.660.10 (GENE3D); PTHR10742:SF284 (PANTHER); PTHR10742 (PANTHER); IPR023753 (SUPERFAMILY); SSF54373 (SUPERFAMILY)
TR1867|c0_g1_i1	pvf1 variant 2 partial	4.46094	3.6165e-06	0.000212519	711	5	F:molecular_function; C:cellular_component; P:signal transduction; P:cell proliferation; P:growth	-	IPR000072 (SMART); IPR000072 (PFAM); IPR029034 (G3DSA:2.10.90.GENE3D); PTHR11633 (PANTHER); PTHR11633:SF1 (PANTHER); IPR000072 (PROSITE_PROFILES); IPR029034 (SUPERFAMILY)
TR39183|c0_g1_i1	PREDICTED: uncharacterized protein LOC106645642, partial	4.43685	1.00023e-06	8.35648e-05	1510	0	-		IPR018289 (PFAM); PTHR20956:SF1 (PANTHER); PTHR20956 (PANTHER)
TR21720|c0_g1_i1	toll-like receptor 13	4.43096	3.015e-05	0.00157238	1607	1	F:molecular_function	-	IPR003591 (SMART); SM00365 (SMART); IPR032675 (G3DSA:3.80.10.GENE3D); IPR032675 (G3DSA:3.80.10.GENE3D); IPR032675 (G3DSA:3.80.10.GENE3D); IPR001611 (PFAM); PTHR24373:SF147 (PANTHER); PTHR24373 (PANTHER); SIGNAL_PEPTIDE (PHOBIUS); SIGNAL_PEPTIDE_C_REGION (PHOBIUS); SIGNAL_PEPTIDE_N_REGION (PHOBIUS); NON_CYTOPLASMIC_DOMAIN (PHOBIUS); SIGNAL_PEPTIDE_H_REGION (PHOBIUS); IPR001611 (PROSITE_PROFILES); …
TR20018|c0_g1_i1	titin-like isoform x1	4.42441	8.75152e-07	7.39366e-05	1169	0	-		Coil (COILS)
TR1493|c1_g1_i1	laminin subunit alpha	4.37639	4.35006e-05	0.00215866	1707	4	P:embryo development; P:cell motility; F:molecular_function; P:cell adhesion	-	Coil (COILS); Coil (COILS); Coil (COILS); Coil (COILS); Coil (COILS); PR00011 (PRINTS); IPR002049 (SMART); G3DSA:2.10.25.10 (GENE3D); IPR002049 (PFAM); IPR009254 (PFAM); PTHR10574 (PANTHER); IPR002049 (PROSITE_PATTERNS); IPR002049 (PROSITE_PATTERNS); IPR002049 (PROSITE_PATTERNS); IPR002049 (PROSITE_PROFILES); IPR002049 (PROSITE_PROFILES); IPR002049 (PROSITE_PROFILES); SSF57196 (SUPERFAMILY); SSF5…
TR51364|c0_g1_i1	hexokinase type 2-like isoform x2	4.12823	2.878e-05	0.00152824	263	0	-		no IPS match
TR8123|c2_g2_i1	acetyl- cytosolic	4.09447	3.975e-08	4.155e-06	1579	2	P:biological_process; F:transferase activity, transferring acyl groups	-	IPR020616 (PFAM); IPR016039 (G3DSA:3.40.47.GENE3D); IPR020617 (PFAM); IPR016039 (G3DSA:3.40.47.GENE3D); IPR002155 (TIGRFAM); IPR002155 (PIRSF); PTHR18919 (PANTHER); PTHR18919:SF101 (PANTHER); IPR020613 (PROSITE_PATTERNS); IPR020615 (PROSITE_PATTERNS); IPR020610 (PROSITE_PATTERNS); IPR016039 (SUPERFAMILY); IPR016039 (SUPERFAMILY)
TR5588|c0_g2_i1	x-ray repair cross-complementing protein 5-like	4.05011	1.6353e-05	0.000730526	868	10	P:response to stress; P:DNA metabolic process; F:helicase activity; F:ATPase activity; F:DNA binding; P:homeostatic process; P:chromosome organization; C:nucleus; C:protein complex; C:chromosome	-	IPR016194 (G3DSA:2.40.290.GENE3D); IPR006164 (PFAM); IPR005160 (G3DSA:1.10.1600.GENE3D); IPR024193 (PTHR12604:PANTHER); PTHR12604 (PANTHER); IPR016194 (SUPERFAMILY)
TR32736|c2_g1_i2	hemk methyltransferase family member 2	4.03679	9.68315e-06	0.000577334	1395	2	F:methyltransferase activity; F:molecular_function; P:cellular protein modification process	EC:2.1.1	IPR004557 (TIGRFAM); IPR029063 (G3DSA:3.40.50.GENE3D); IPR025714 (PFAM); PTHR18895 (PANTHER); PTHR18895:SF71 (PANTHER); IPR002052 (PROSITE_PATTERNS); SignalP-noTM (SIGNALP_EUK); IPR029063 (SUPERFAMILY)
TR3953|c4_g1_i15	sorbin and sh3 domain-containing protein 1 isoform x3	4.01509	5.66725e-07	3.88135e-05	3531	4	F:molecular_function; P:cell motility; P:cell adhesion; P:cytoskeleton organization	-	Coil (COILS); IPR001452 (PRINTS); IPR001478 (SMART); IPR001452 (SMART); IPR003127 (PFAM); IPR001452 (PFAM); IPR011511 (PFAM); IPR001452 (PFAM); IPR001478 (G3DSA:2.30.42.GENE3D); G3DSA:2.30.30.40 (GENE3D); G3DSA:2.30.30.40 (GENE3D); IPR001478 (PFAM); PTHR10663 (PANTHER); PTHR10663 (PANTHER); IPR028516 (PTHR10663:PANTHER); IPR028516 (PTHR10663:PANTHER); IPR001478 (PROSITE_PROFILES); IPR001452 (PROS…
TR24715|c11_g1_i6	mothers against decapentaplegic homolog 4 isoform x3	3.97413	5.02e-05	0.00247763	557	0	-		no IPS match
TR50312|c19_g1_i1	PREDICTED: uncharacterized protein LOC105272558	3.87439	1.15574e-05	0.000664683	965	0	-		NON_CYTOPLASMIC_DOMAIN (PHOBIUS); SIGNAL_PEPTIDE_N_REGION (PHOBIUS); SIGNAL_PEPTIDE_C_REGION (PHOBIUS); SIGNAL_PEPTIDE (PHOBIUS); SIGNAL_PEPTIDE_H_REGION (PHOBIUS); SignalP-noTM (SIGNALP_EUK); SignalP-TM (SIGNALP_GRAM_NEGATIVE); TMhelix (TMHMM)
TR40388|c3_g1_i2	copia protein	3.86629	1.51601e-05	0.00085699	2079	0	-		IPR013103 (PFAM); PTHR11439 (PANTHER); SSF56672 (SUPERFAMILY)
TR16863|c1_g3_i1	PREDICTED: uncharacterized protein LOC107047970	3.82016	1.70548e-05	0.000950818	2128	0	-		no IPS match
TR8189|c0_g1_i1	glycerol-3-phosphate dehydrogenase	3.56872	2.99285e-06	0.000215966	2013	6	P:carbohydrate metabolic process; F:molecular_function; F:oxidoreductase activity; P:catabolic process; C:protein complex; C:cytoplasm; P:biological_process; P:lipid metabolic process	EC:1.1.1.8; EC:1.1.1.94	IPR008011 (PFAM); PTHR13166 (PANTHER)
TR12974|c0_g1_i1	bardet-biedl syndrome 2 protein homolog	3.56079	4.0315e-06	0.000279386	2291	4	P:cell morphogenesis; P:cellular component assembly; P:anatomical structure formation involved in morphogenesis; C:protein complex	-	Coil (COILS); IPR029430 (PFAM); IPR029333 (PFAM); IPR029429 (PFAM); IPR016616 (PIRSF); G3DSA:2.130.10.130 (GENE3D); IPR016616 (PTHR32465:PANTHER); PTHR32465 (PANTHER); SSF69318 (SUPERFAMILY); SSF101898 (SUPERFAMILY)
TR28742|c3_g1_i5	trithorax group protein osa-like	3.54634	3.61209e-05	0.00185638	3806	3	P:biological_process; F:molecular_function; C:extracellular region	-	IPR002557 (SMART); IPR002557 (G3DSA:2.170.140.GENE3D); IPR002557 (PFAM); PTHR23301 (PANTHER); NON_CYTOPLASMIC_DOMAIN (PHOBIUS); SIGNAL_PEPTIDE_N_REGION (PHOBIUS); SIGNAL_PEPTIDE (PHOBIUS); SIGNAL_PEPTIDE_C_REGION (PHOBIUS); SIGNAL_PEPTIDE_H_REGION (PHOBIUS); IPR002557 (PROSITE_PROFILES); IPR002557 (PROSITE_PROFILES); IPR002557 (PROSITE_PROFILES); IPR002557 (SUPERFAMILY); IPR002557 (SUPERFAMILY); …
TR28790|c0_g1_i1	nucleolar protein 6	3.54432	5.295e-06	0.000275049	3451	0	-		IPR005554 (PFAM); IPR005554 (PANTHER)
TR19365|c2_g1_i6	cdk5 and abl1 enzyme substrate 2 isoform x1	3.52621	4.915e-06	0.000332656	2380	0	-		CYTOPLASMIC_DOMAIN (PHOBIUS); TRANSMEMBRANE (PHOBIUS); NON_CYTOPLASMIC_DOMAIN (PHOBIUS); TMhelix (TMHMM)
TR29805|c0_g1_i2	dna ligase 3 isoform x1	3.50245	5.94743e-05	0.00279316	815	2	F:DNA binding; F:ion binding	-	IPR001510 (G3DSA:3.30.1740.GENE3D); IPR001510 (PFAM); PTHR10459:SF11 (PANTHER); PTHR10459 (PANTHER); IPR001510 (PROSITE_PATTERNS); IPR001510 (PROSITE_PROFILES); SSF57716 (SUPERFAMILY)
TR32870|c7_g1_i1	14-3-3 protein epsilon	3.48908	9.06671e-05	0.00366101	244	1	F:molecular_function	-	TRANSMEMBRANE (PHOBIUS); CYTOPLASMIC_DOMAIN (PHOBIUS); CYTOPLASMIC_DOMAIN (PHOBIUS); TRANSMEMBRANE (PHOBIUS); NON_CYTOPLASMIC_DOMAIN (PHOBIUS); TMhelix (TMHMM); TMhelix (TMHMM)
TR53758|c1_g1_i1	PREDICTED: uncharacterized protein LOC107042544	3.48094	2.195e-06	0.000156457	1499	0	-		Coil (COILS); Coil (COILS); Coil (COILS); Coil (COILS)
TR27568|c1_g1_i1	gtpase-activating rap ran-gap domain-like protein 3 isoform x3	3.42149	6.12982e-05	0.00230279	3308	2	P:signal transduction; F:enzyme regulator activity	-	IPR000331 (PFAM); IPR001180 (PFAM); PTHR15711:SF19 (PANTHER); PTHR15711 (PANTHER); PTHR15711:SF19 (PANTHER); IPR001180 (PROSITE_PROFILES); IPR000331 (PROSITE_PROFILES); IPR000331 (SUPERFAMILY)
TR50321|c8_g1_i1	troponin i isoform x8	3.377	3.04e-06	0.0002207	844	3	C:cytoskeleton; C:cytoplasm; C:protein complex	-	no IPS match
TR38171|c0_g1_i1	bromo adjacent-like proteiny domain-containing 1 protein	3.37273	2.62e-05	0.00140782	604	1	F:chromatin binding		no IPS match
TR33198|c5_g2_i1	zinc finger swim domain-containing protein 1-like	3.35244	9.06986e-05	0.00390333	2056	1	F:ion binding	-	IPR018289 (PFAM); PTHR31569:SF5 (PANTHER); PTHR31569 (PANTHER); IPR007527 (PROSITE_PROFILES)
TR48885|c0_g1_i11	trehalase-like isoform x5	3.30236	4.94e-06	0.000312739	2296	2	P:carbohydrate metabolic process; F:hydrolase activity, acting on glycosyl bonds	EC:3.2.1.28	IPR001661 (PRINTS); IPR001661 (PFAM); IPR001661 (PANTHER); PTHR23403:SF1 (PANTHER); IPR018232 (PROSITE_PATTERNS); IPR018232 (PROSITE_PATTERNS); TRANSMEMBRANE (PHOBIUS); CYTOPLASMIC_DOMAIN (PHOBIUS); NON_CYTOPLASMIC_DOMAIN (PHOBIUS); IPR008928 (SUPERFAMILY)
TR16825|c9_g1_i2	semaphorin-2a isoform x1	3.21278	2.2515e-05	0.00105728	2346	1	F:molecular_function	-	IPR001627 (SMART); G3DSA:3.30.1680.10 (GENE3D); IPR001627 (PFAM); IPR013783 (G3DSA:2.60.40.GENE3D); IPR015943 (G3DSA:2.130.10.GENE3D); IPR027231 (PANTHER); PTHR11036:SF82 (PANTHER); IPR001627 (PROSITE_PROFILES); IPR007110 (PROSITE_PROFILES); IPR016201 (SUPERFAMILY); IPR001627 (SUPERFAMILY); IPR007110 (SUPERFAMILY)
TR20245|c0_g1_i1	cytochrome b	3.21263	6.23e-06	0.00039993	1257	9	C:intracellular; C:protein complex; F:transmembrane transporter activity; F:oxidoreductase activity; C:mitochondrion; P:transmembrane transport; F:ion binding; F:molecular_function; P:generation of precursor metabolites and energy; P:small molecule metabolic process; P:cellular nitrogen compound metabolic process	EC:1.10.2.2	no IPS match
TR34612|c2_g1_i2	PREDICTED: uncharacterized protein LOC105265453	3.17563	0.000128989	0.00427095	824	0	-		SIGNAL_PEPTIDE_N_REGION (PHOBIUS); SIGNAL_PEPTIDE_C_REGION (PHOBIUS); SIGNAL_PEPTIDE (PHOBIUS); NON_CYTOPLASMIC_DOMAIN (PHOBIUS); SIGNAL_PEPTIDE_H_REGION (PHOBIUS); SignalP-noTM (SIGNALP_EUK)
TR54708|c0_g1_i1	probable citrate synthase mitochondrial	3.16286	1.701e-05	0.000966121	1854	3	F:transferase activity, transferring acyl groups; P:generation of precursor metabolites and energy; P:small molecule metabolic process	EC:2.3.3.1	IPR002020 (PRINTS); IPR016142 (G3DSA:1.10.580.GENE3D); IPR010109 (TIGRFAM); IPR002020 (PFAM); PTHR11739:SF8 (PANTHER); IPR002020 (PANTHER); IPR019810 (PROSITE_PATTERNS); IPR002020 (SUPERFAMILY)
TR5280|c0_g1_i1	histone-lysine n-methyltransferase ash1	3.15343	0.000110591	0.00387136	473	0	-		SignalP-TM (SIGNALP_GRAM_POSITIVE)
TR53438|c0_g1_i1	troponin c	3.13896	1.5085e-05	0.000861906	801	1	F:ion binding	-	IPR002048 (SMART); IPR011992 (G3DSA:1.10.238.GENE3D); IPR011992 (G3DSA:1.10.238.GENE3D); IPR002048 (PFAM); IPR002048 (PFAM); IPR002048 (PFAM); PTHR23050 (PANTHER); PTHR23050:SF199 (PANTHER); IPR018247 (PROSITE_PATTERNS); IPR002048 (PROSITE_PROFILES); IPR002048 (PROSITE_PROFILES); IPR002048 (PROSITE_PROFILES); IPR002048 (PROSITE_PROFILES); IPR011992 (SUPERFAMILY)
TR21285|c2_g1_i1	oxysterol-binding protein 8 isoform x3	3.13626	2e-05	0.00110983	3456	0	-		no IPS match
TR17097|c0_g1_i3	troponin skeletal muscle-like isoform x2	3.1081	1.175e-05	0.000674472	1433	4	C:cytoskeleton; C:protein complex; C:cytoplasm; P:biological_process	-	Coil (COILS); Coil (COILS); Coil (COILS); G3DSA:1.20.5.350 (GENE3D); IPR001978 (PFAM); IPR027707 (PANTHER); SSF90250 (SUPERFAMILY)
TR42229|c0_g1_i5	facilitated trehalose transporter tret1-like isoform x2	3.06683	9.12718e-05	0.00308066	1703	3	P:transmembrane transport; F:transmembrane transporter activity; C:cellular_component	-	IPR003663 (PRINTS); IPR005828 (PFAM); G3DSA:1.20.1250.20 (GENE3D); PTHR23500:SF97 (PANTHER); PTHR23500 (PANTHER); IPR005829 (PROSITE_PATTERNS); IPR005829 (PROSITE_PATTERNS); CYTOPLASMIC_DOMAIN (PHOBIUS); TRANSMEMBRANE (PHOBIUS); CYTOPLASMIC_DOMAIN (PHOBIUS); TRANSMEMBRANE (PHOBIUS); TRANSMEMBRANE (PHOBIUS); CYTOPLASMIC_DOMAIN (PHOBIUS); TRANSMEMBRANE (PHOBIUS); TRANSMEMBRANE (PHOBIUS); TRANSMEMBR…
TR31660|c6_g1_i11	twitchin isoform x2	3.04856	0.000151449	0.00474023	973	1	F:molecular_function	-	IPR013783 (G3DSA:2.60.40.GENE3D); IPR013783 (G3DSA:2.60.40.GENE3D); IPR013098 (PFAM); PTHR10489 (PANTHER); PTHR10489:SF734 (PANTHER); IPR007110 (SUPERFAMILY); IPR007110 (SUPERFAMILY)
TR3934|c2_g1_i2	angiotensin-converting enzyme-like	2.95114	0.000106114	0.00455796	645	3	P:biological_process; F:peptidase activity; C:cellular_component	EC:3.4.15	IPR001548 (PFAM); SSF55486 (SUPERFAMILY)
TR50313|c11_g1_i5	jnk-interacting protein 3 isoform x4	2.89551	6.43107e-05	0.00302518	4313	1	F:molecular_function	-	Coil (COILS); Coil (COILS); Coil (COILS); Coil (COILS); Coil (COILS); IPR019143 (PFAM); IPR032486 (PFAM); IPR015943 (G3DSA:2.130.10.GENE3D); G3DSA:1.20.5.1000 (GENE3D); PTHR13886 (PANTHER); IPR017986 (SUPERFAMILY)
TR24636|c11_g1_i2	probable na(+) h(+) antiporter nhx-9 isoform x2	2.85931	0.000107232	0.00406391	4198	4	P:homeostatic process; P:transport; P:transmembrane transport; C:cellular_component; F:transmembrane transporter activity	-	IPR004709 (PRINTS); IPR004709 (TIGRFAM); IPR006153 (PFAM); IPR018422 (PANTHER); PTHR10110:SF98 (PANTHER); SIGNAL_PEPTIDE_N_REGION (PHOBIUS); TRANSMEMBRANE (PHOBIUS); TRANSMEMBRANE (PHOBIUS); CYTOPLASMIC_DOMAIN (PHOBIUS); TRANSMEMBRANE (PHOBIUS); NON_CYTOPLASMIC_DOMAIN (PHOBIUS); CYTOPLASMIC_DOMAIN (PHOBIUS); SIGNAL_PEPTIDE_C_REGION (PHOBIUS); TRANSMEMBRANE (PHOBIUS); TRANSMEMBRANE (PHOBIUS); TRAN…
TR52840|c2_g1_i1	protein clec16a isoform x1	2.82095	0.000236791	0.00853071	1852	0	-		IPR019155 (PFAM); PTHR21481:SF0 (PANTHER); PTHR21481 (PANTHER); NON_CYTOPLASMIC_DOMAIN (PHOBIUS); CYTOPLASMIC_DOMAIN (PHOBIUS); TRANSMEMBRANE (PHOBIUS)
TR49185|c0_g1_i1	cytochrome c oxidase subunit partial	2.77732	7.205e-05	0.00335992	1635	0	-		no IPS match
TR4012|c2_g1_i1	tropomyosin-1 isoform x2	2.73196	9.39129e-05	0.00412281	1098	0	-		Coil (COILS); Coil (COILS); IPR000533 (PRINTS); G3DSA:1.20.5.340 (GENE3D); IPR000533 (PFAM); PTHR19269:SF51 (PANTHER); PTHR19269 (PANTHER); IPR000533 (PROSITE_PATTERNS); SSF57997 (SUPERFAMILY)
TR53935|c0_g1_i1	protein fam10a4	2.68862	0.000132959	0.00535703	1658	1	F:molecular_function	-	IPR019734 (SMART); IPR019734 (PFAM); PF13432 (PFAM); IPR011990 (G3DSA:1.25.40.GENE3D); PTHR22904:SF327 (PANTHER); PTHR22904 (PANTHER); IPR019734 (PROSITE_PROFILES); IPR013026 (PROSITE_PROFILES); IPR019734 (PROSITE_PROFILES); IPR019734 (PROSITE_PROFILES); IPR011990 (SUPERFAMILY)

## Sheet: Ae - SA up - Body
Suplementary table 1, page 2: genes up-regulated in Bodies of Aphidius ervi - SA compared to Aphidius ervi - AP
ID	Sequence description	LogFC	PValue	FDR	Seq Length	#Gos	Gos	Enzyme Codes	InterProScan
TR55054|c1_g1_i2	neuronal acetylcholine receptor subunit alpha-7	2.78434	0.000127942	0.00537413	1232	3	P:transport; F:transmembrane transporter activity; C:cellular_component	-	IPR006029 (PFAM); IPR006202 (G3DSA:2.70.170.GENE3D); IPR027361 (G3DSA:1.20.120.GENE3D); IPR006202 (PFAM); IPR006201 (PANTHER); PTHR18945:SF562 (PANTHER); CYTOPLASMIC_DOMAIN (PHOBIUS); NON_CYTOPLASMIC_DOMAIN (PHOBIUS); NON_CYTOPLASMIC_DOMAIN (PHOBIUS); TRANSMEMBRANE (PHOBIUS); TRANSMEMBRANE (PHOBIUS); CYTOPLASMIC_DOMAIN (PHOBIUS); TRANSMEMBRANE (PHOBIUS); TRANSMEMBRANE (PHOBIUS); CYTOPLASMIC_DOMAI…
TR32715|c10_g10_i3	sodium channel protein 60e	8.54289	7.09592e-06	0.000456228	5559	6	P:transport; C:protein complex; C:plasma membrane; F:transmembrane transporter activity; P:transmembrane transport; F:molecular_function	-	Coil (COILS); IPR001696 (PRINTS); IPR031649 (PFAM); G3DSA:1.20.5.150 (GENE3D); IPR010526 (PFAM); IPR005821 (PFAM); IPR027359 (G3DSA:1.20.120.GENE3D); G3DSA:1.10.287.930 (GENE3D); IPR028820 (PTHR10037:PANTHER); PTHR10037 (PANTHER); PTHR10037 (PANTHER); IPR028820 (PTHR10037:PANTHER); PTHR10037 (PANTHER); PTHR10037 (PANTHER); IPR028820 (PTHR10037:PANTHER); CYTOPLASMIC_DOMAIN (PHOBIUS); TRANSMEMBRANE…
TR52610|c0_g1_i6	sodium hydrogen exchanger 7 isoform x5	3.24263	4.70181e-05	0.00231386	2495	5	P:transport; C:cellular_component; F:transmembrane transporter activity; P:homeostatic process; P:transmembrane transport	-	IPR002090 (PRINTS); IPR004709 (PRINTS); IPR004709 (TIGRFAM); IPR006153 (PFAM); PTHR10110:SF94 (PANTHER); PTHR10110:SF94 (PANTHER); IPR018422 (PANTHER); IPR018422 (PANTHER); CYTOPLASMIC_DOMAIN (PHOBIUS); NON_CYTOPLASMIC_DOMAIN (PHOBIUS); CYTOPLASMIC_DOMAIN (PHOBIUS); CYTOPLASMIC_DOMAIN (PHOBIUS); TRANSMEMBRANE (PHOBIUS); TRANSMEMBRANE (PHOBIUS); CYTOPLASMIC_DOMAIN (PHOBIUS); TRANSMEMBRANE (PHOBIUS…
TR13038|c0_g3_i2	excitatory amino acid transporter isoform x2	3.58144	2.35934e-05	0.0012924	2707	3	P:transport; C:cellular_component; F:transmembrane transporter activity	-	IPR001991 (PRINTS); IPR001991 (G3DSA:1.10.3860.GENE3D); IPR001991 (PFAM); PTHR11958:SF63 (PANTHER); IPR001991 (PANTHER); IPR018107 (PROSITE_PATTERNS); NON_CYTOPLASMIC_DOMAIN (PHOBIUS); TRANSMEMBRANE (PHOBIUS); TRANSMEMBRANE (PHOBIUS); TRANSMEMBRANE (PHOBIUS); NON_CYTOPLASMIC_DOMAIN (PHOBIUS); CYTOPLASMIC_DOMAIN (PHOBIUS); NON_CYTOPLASMIC_DOMAIN (PHOBIUS); TRANSMEMBRANE (PHOBIUS); NON_CYTOPLASMIC_…
TR42270|c3_g5_i12	calcium-activated potassium channel slowpoke isoform x6	10.9925	5.80319e-12	1.95345e-09	932	4	P:transmembrane transport; F:transmembrane transporter activity; C:protein complex; C:plasma membrane	-	IPR003280 (PRINTS); IPR028325 (PRINTS); IPR005821 (PFAM); G3DSA:1.10.287.70 (GENE3D); G3DSA:1.10.287.70 (GENE3D); PTHR10027:SF29 (PANTHER); PTHR10027 (PANTHER); NON_CYTOPLASMIC_DOMAIN (PHOBIUS); NON_CYTOPLASMIC_DOMAIN (PHOBIUS); NON_CYTOPLASMIC_DOMAIN (PHOBIUS); CYTOPLASMIC_DOMAIN (PHOBIUS); TRANSMEMBRANE (PHOBIUS); TRANSMEMBRANE (PHOBIUS); CYTOPLASMIC_DOMAIN (PHOBIUS); CYTOPLASMIC_DOMAIN (PHOBIU…
TR3998|c1_g1_i6	rho gtpase-activating protein 100f isoform x1	6.74807	3.54726e-05	0.00142188	4221	2	P:signal transduction; F:molecular_function	-	IPR000008 (SMART); IPR000198 (SMART); IPR001478 (SMART); IPR000198 (G3DSA:1.10.555.GENE3D); IPR000008 (G3DSA:2.60.40.GENE3D); IPR001478 (G3DSA:2.30.42.GENE3D); IPR000198 (PFAM); IPR001478 (PFAM); PTHR23176:SF40 (PANTHER); PTHR23176 (PANTHER); IPR001478 (PROSITE_PROFILES); IPR000198 (PROSITE_PROFILES); IPR000008 (SUPERFAMILY); IPR001478 (SUPERFAMILY); IPR008936 (SUPERFAMILY)
TR16792|c0_g1_i1	reverse transcriptase homolog	5.32872	2.09179e-07	2.12006e-05	2887	4	P:RNA-dependent DNA replication; F:RNA-directed DNA polymerase activity; P:nucleic acid phosphodiester bond hydrolysis; F:endonuclease activity		IPR005135 (PFAM); IPR005135 (G3DSA:3.60.10.GENE3D); IPR000477 (PFAM); PTHR19446:SF352 (PANTHER); PTHR19446 (PANTHER); IPR000477 (PROSITE_PROFILES); SSF56672 (SUPERFAMILY); IPR005135 (SUPERFAMILY)
TR31615|c2_g1_i1	PREDICTED: uncharacterized protein LOC105456969	10.75	2.69799e-11	7.43685e-09	2448	2	P:proteolysis; F:cysteine-type peptidase activity		Coil (COILS); SSF54001 (SUPERFAMILY)
TR31615|c1_g1_i1	PREDICTED: uncharacterized protein LOC103511594	6.98934	1.54692e-12	5.52285e-10	3742	7	P:homeostatic process; P:chromosome organization; P:DNA metabolic process; F:helicase activity; P:response to stress; F:ion binding; C:chromosome	-	Coil (COILS); Coil (COILS); IPR010285 (PFAM); IPR027417 (G3DSA:3.40.50.GENE3D); IPR025476 (PFAM); IPR003840 (PANTHER); PTHR23274:SF14 (PANTHER); IPR027417 (SUPERFAMILY)
TR6248|c0_g2_i1	nesprin-1 isoform x6	6.40503	0.000111244	0.00459934	1578	4	P:cytoskeleton organization; C:nuclear envelope; C:protein complex; F:cytoskeletal protein binding	-	IPR001715 (SMART); IPR001715 (G3DSA:1.10.418.GENE3D); IPR001715 (PFAM); IPR030265 (PTHR11915:PANTHER); PTHR11915 (PANTHER); IPR001589 (PROSITE_PATTERNS); IPR001715 (PROSITE_PROFILES); IPR001715 (SUPERFAMILY)
TR32717|c6_g1_i1	paired amphipathic helix protein sin3a	9.93397	3.39705e-09	5.59534e-07	1505	2	P:cellular nitrogen compound metabolic process; P:biosynthetic process	-	Coil (COILS); Coil (COILS); IPR003822 (PFAM); IPR003822 (G3DSA:1.20.1160.GENE3D); PTHR12346:SF0 (PANTHER); PTHR12346 (PANTHER); PTHR12346 (PANTHER); PTHR12346:SF0 (PANTHER); IPR003822 (PROSITE_PROFILES); IPR003822 (PROSITE_PROFILES); IPR003822 (SUPERFAMILY); IPR003822 (SUPERFAMILY); IPR003822 (SUPERFAMILY)
TR41810|c12_g5_i10	vinculin isoform x9	11.0917	3.07151e-12	1.11681e-09	3635	4	P:cell adhesion; F:cytoskeletal protein binding; C:cytoskeleton; F:structural molecule activity	-	PR00806 (PRINTS); G3DSA:1.20.1490.10 (GENE3D); IPR006077 (PFAM); G3DSA:1.20.120.230 (GENE3D); G3DSA:1.20.120.230 (GENE3D); G3DSA:1.20.120.230 (GENE3D); G3DSA:1.20.120.230 (GENE3D); PTHR18914:SF1 (PANTHER); IPR006077 (PANTHER); IPR006077 (PANTHER); PTHR18914:SF1 (PANTHER); PTHR18914:SF1 (PANTHER); IPR000633 (PROSITE_PATTERNS); IPR006077 (SUPERFAMILY); IPR006077 (SUPERFAMILY); IPR006077 (SUPERFAMIL…
TR53220|c1_g1_i5	lysine-specific histone demethylase 1a	3.06544	7.40923e-05	0.00285733	2812	10	P:biological_process; P:chromosome organization; P:cellular protein modification process; P:cellular nitrogen compound metabolic process; P:biosynthetic process; F:DNA binding; F:oxidoreductase activity; F:ion binding; F:methyltransferase activity; C:nucleus	-	Coil (COILS); Coil (COILS); IPR002937 (PFAM); G3DSA:1.10.287.80 (GENE3D); G3DSA:3.90.660.10 (GENE3D); PTHR10742:SF284 (PANTHER); PTHR10742 (PANTHER); IPR023753 (SUPERFAMILY); SSF54373 (SUPERFAMILY)
TR13691|c0_g1_i3	membrane metallo-endopeptidase-like partial	9.60969	7.62444e-13	3.87629e-10	2084	2	P:biological_process; F:peptidase activity	EC:3.4.24	IPR018497 (PRINTS); IPR024079 (G3DSA:3.40.390.GENE3D); IPR018497 (PFAM); IPR008753 (PFAM); IPR000718 (PANTHER); SIGNAL_PEPTIDE_C_REGION (PHOBIUS); SIGNAL_PEPTIDE (PHOBIUS); SIGNAL_PEPTIDE_H_REGION (PHOBIUS); NON_CYTOPLASMIC_DOMAIN (PHOBIUS); SIGNAL_PEPTIDE_N_REGION (PHOBIUS); SignalP-noTM (SIGNALP_EUK); SSF55486 (SUPERFAMILY); TMhelix (TMHMM)
TR29336|c0_g1_i5	serine protease 48-like	5.13559	8.3705e-08	9.56752e-06	890	2	P:biological_process; F:peptidase activity	EC:3.4.21	IPR001314 (PRINTS); IPR001254 (SMART); G3DSA:2.40.10.10 (GENE3D); G3DSA:2.40.10.10 (GENE3D); IPR001254 (PFAM); PTHR24276 (PANTHER); IPR018114 (PROSITE_PATTERNS); IPR033116 (PROSITE_PATTERNS); SIGNAL_PEPTIDE_H_REGION (PHOBIUS); NON_CYTOPLASMIC_DOMAIN (PHOBIUS); SIGNAL_PEPTIDE_N_REGION (PHOBIUS); SIGNAL_PEPTIDE_C_REGION (PHOBIUS); SIGNAL_PEPTIDE (PHOBIUS); IPR001254 (PROSITE_PROFILES); PS51257 (PRO…
TR34000|c0_g1_i1	neprilysin-2 isoform x1	8.56456	9.2859e-10	1.4982e-07	703	2	P:biological_process; F:peptidase activity	EC:3.4.24	IPR018497 (PFAM); IPR008753 (PFAM); IPR024079 (G3DSA:3.40.390.GENE3D); IPR000718 (PANTHER); SSF55486 (SUPERFAMILY)
TR53771|c7_g1_i3	tyramine beta-hydroxylase	2.71667	0.000166783	0.00633838	2448	3	P:biological_process; F:oxidoreductase activity; F:ion binding	EC:1.14.17	IPR000945 (PRINTS); IPR005018 (SMART); IPR024548 (PFAM); IPR014784 (G3DSA:2.60.120.GENE3D); IPR000323 (PFAM); IPR005018 (PFAM); IPR000323 (G3DSA:2.60.120.GENE3D); IPR000945 (PANTHER); IPR028460 (PTHR10157:PANTHER); IPR020611 (PROSITE_PATTERNS); SIGNAL_PEPTIDE (PHOBIUS); SIGNAL_PEPTIDE_N_REGION (PHOBIUS); NON_CYTOPLASMIC_DOMAIN (PHOBIUS); SIGNAL_PEPTIDE_H_REGION (PHOBIUS); SIGNAL_PEPTIDE_C_REGION …
TR25979|c0_g1_i1	dynein heavy chain axonemal	3.62736	5.4432e-06	0.000350028	1434	6	P:biological_process; C:cytoskeleton; C:protein complex; F:ATPase activity; F:ion binding; F:molecular_function	EC:3.6.1.3	IPR004273 (PFAM); IPR026983 (PANTHER); PTHR10676:SF280 (PANTHER)
TR9096|c9_g1_i6	piezo-type mechanosensitive ion channel component 1 isoform x2	9.28143	6.65762e-12	2.21354e-09	7044	3	F:transmembrane transporter activity; C:cellular_component; P:transport	-	IPR031334 (PFAM); IPR031805 (PFAM); IPR027272 (PANTHER); NON_CYTOPLASMIC_DOMAIN (PHOBIUS); NON_CYTOPLASMIC_DOMAIN (PHOBIUS); TRANSMEMBRANE (PHOBIUS); NON_CYTOPLASMIC_DOMAIN (PHOBIUS); NON_CYTOPLASMIC_DOMAIN (PHOBIUS); CYTOPLASMIC_DOMAIN (PHOBIUS); CYTOPLASMIC_DOMAIN (PHOBIUS); TRANSMEMBRANE (PHOBIUS); CYTOPLASMIC_DOMAIN (PHOBIUS); TRANSMEMBRANE (PHOBIUS); NON_CYTOPLASMIC_DOMAIN (PHOBIUS); NON_CYT…
TR19205|c0_g1_i4	steroid hormone receptor err1 isoform x10	6.68313	3.32776e-05	0.00173045	1244	10	F:signal transducer activity; P:cellular nitrogen compound metabolic process; P:biosynthetic process; C:nucleus; P:signal transduction; F:DNA binding; F:nucleic acid binding transcription factor activity; F:ion binding; C:protein complex; C:intracellular	-	IPR001723 (PRINTS); IPR000536 (SMART); IPR001628 (SMART); IPR000536 (PFAM); IPR000536 (G3DSA:1.10.565.GENE3D); IPR013088 (G3DSA:3.30.50.GENE3D); IPR001628 (PFAM); PTHR24084:SF24 (PANTHER); PTHR24084 (PANTHER); IPR001628 (PROSITE_PROFILES); IPR000536 (SUPERFAMILY); SSF57716 (SUPERFAMILY)
TR52842|c10_g2_i1	protein alan shepard isoform x1	4.2892	2.94002e-08	3.46645e-06	1506	2	F:RNA binding; F:molecular_function	-	IPR002343 (PRINTS); IPR000504 (SMART); IPR012677 (G3DSA:3.30.70.GENE3D); IPR012677 (G3DSA:3.30.70.GENE3D); IPR000504 (PFAM); PTHR24012 (PANTHER); PTHR24012:SF429 (PANTHER); PTHR24012 (PANTHER); PTHR24012:SF429 (PANTHER); IPR000504 (PROSITE_PROFILES); IPR000504 (PROSITE_PROFILES); IPR012677 (SUPERFAMILY); IPR012677 (SUPERFAMILY)
TR48980|c1_g2_i1	creb-binding protein isoform x5	8.7723	2.55032e-10	4.85709e-08	927	5	F:protein binding transcription factor activity; P:cellular nitrogen compound metabolic process; P:biosynthetic process; C:intracellular; C:protein complex	-	Coil (COILS); IPR003101 (PFAM); IPR003101 (G3DSA:1.10.246.GENE3D); PTHR13808:SF1 (PANTHER); PTHR13808 (PANTHER); IPR003101 (PROSITE_PROFILES); IPR003101 (PROSITE_PROFILES); IPR003101 (SUPERFAMILY); IPR003101 (SUPERFAMILY)
TR55141|c2_g2_i18	inositol hexakisphosphate and diphosphoinositol-pentakisphosphate kinase isoform x8	8.08796	6.75161e-05	0.00303803	4780	4	F:phosphatase activity; P:small molecule metabolic process; P:cellular nitrogen compound metabolic process; P:biological_process	EC:3.1.3.2	IPR000560 (PFAM); IPR029033 (G3DSA:3.40.50.GENE3D); PTHR12750 (PANTHER); PTHR12750:SF9 (PANTHER); PTHR12750:SF9 (PANTHER); IPR033379 (PROSITE_PATTERNS); IPR029033 (SUPERFAMILY)
TR3988|c3_g1_i6	a disintegrin and metalloproteinase with thrombospondin motifs 7-like isoform x1	8.46781	9.97673e-06	0.000602716	550	5	F:peptidase activity; P:signal transduction; P:biological_process; F:ion binding; C:proteinaceous extracellular matrix	EC:3.4.24	IPR024079 (G3DSA:3.40.390.GENE3D); PTHR13723 (PANTHER); SSF55486 (SUPERFAMILY)
TR32865|c1_g1_i2	a disintegrin and metalloproteinase with thrombospondin motifs 16 isoform x1	9.63547	2.0565e-08	2.70658e-06	2810	2	F:peptidase activity; P:biological_process	EC:3.4.24	IPR006586 (SMART); IPR024079 (G3DSA:3.40.390.GENE3D); PF13582 (PFAM); PTHR13723 (PANTHER); PTHR13723:SF196 (PANTHER); SIGNAL_PEPTIDE_C_REGION (PHOBIUS); SIGNAL_PEPTIDE_N_REGION (PHOBIUS); SIGNAL_PEPTIDE_H_REGION (PHOBIUS); SIGNAL_PEPTIDE (PHOBIUS); NON_CYTOPLASMIC_DOMAIN (PHOBIUS); IPR001590 (PROSITE_PROFILES); SignalP-noTM (SIGNALP_EUK); SSF55486 (SUPERFAMILY)
TR9383|c2_g1_i1	laccase-like isoform x2	5.28711	5.31037e-08	5.20178e-06	1618	3	F:oxidoreductase activity; P:biological_process; F:ion binding	-	IPR008972 (G3DSA:2.60.40.GENE3D); IPR011706 (PFAM); IPR011707 (PFAM); IPR001117 (PFAM); IPR008972 (G3DSA:2.60.40.GENE3D); IPR008972 (G3DSA:2.60.40.GENE3D); PTHR11709:SF75 (PANTHER); PTHR11709 (PANTHER); PTHR11709:SF75 (PANTHER); IPR033138 (PROSITE_PATTERNS); IPR002355 (PROSITE_PATTERNS); IPR008972 (SUPERFAMILY); IPR008972 (SUPERFAMILY); IPR008972 (SUPERFAMILY)
TR1515|c1_g1_i2	gag-pol polyprotein	3.81918	1.2797e-06	8.11197e-05	4179	4	F:nucleic acid binding; P:proteolysis; P:DNA integration; F:aspartic-type endopeptidase activity		no IPS match
TR5686|c0_g1_i1	rna-directed dna polymerase from mobile element jockey-like	6.33033	2.5667e-05	0.00111225	1130	3	F:molecular_function; F:nuclease activity; P:cellular nitrogen compound metabolic process	EC:3.1.26.4	IPR002156 (PFAM); IPR012337 (G3DSA:3.30.420.GENE3D); PTHR10642:SF3 (PANTHER); PTHR10642 (PANTHER); IPR002156 (PROSITE_PROFILES); IPR012337 (SUPERFAMILY)
TR30823|c0_g1_i22	sal-like protein 4 isoform x2	6.73514	3.85376e-05	0.00151322	971	2	F:molecular_function; F:ion binding	-	Coil (COILS); IPR015880 (SMART); PF12874 (PFAM); IPR013087 (G3DSA:3.30.160.GENE3D); IPR007087 (PFAM); IPR007087 (PROSITE_PATTERNS); IPR007087 (PROSITE_PATTERNS); IPR007087 (PROSITE_PROFILES); IPR007087 (PROSITE_PROFILES); SSF57667 (SUPERFAMILY)
TR30823|c0_g1_i9	zinc finger protein rotund isoform x7	6.89074	2.90101e-06	0.000163908	1750	2	F:molecular_function; F:ion binding	-	Coil (COILS); Coil (COILS); Coil (COILS); Coil (COILS); IPR015880 (SMART); IPR013087 (G3DSA:3.30.160.GENE3D); IPR013087 (G3DSA:3.30.160.GENE3D); IPR007087 (PFAM); IPR007087 (PFAM); IPR013087 (G3DSA:3.30.160.GENE3D); IPR013087 (G3DSA:3.30.160.GENE3D); PF12874 (PFAM); PTHR24409 (PANTHER); IPR007087 (PROSITE_PATTERNS); IPR007087 (PROSITE_PATTERNS); IPR007087 (PROSITE_PATTERNS); IPR007087 (PROSITE_PA…
TR19336|c1_g1_i10	fh1 fh2 domain-containing protein 3 isoform x4	10.8271	1.68814e-11	4.93313e-09	4368	1	F:molecular_function	-	IPR015425 (SMART); IPR015425 (PFAM); PTHR23213 (PANTHER); PTHR23213:SF184 (PANTHER); PTHR23213 (PANTHER); IPR014768 (PROSITE_PROFILES); IPR015425 (PROSITE_PROFILES); IPR016024 (SUPERFAMILY); SSF101447 (SUPERFAMILY)
TR28757|c12_g5_i1	ptb-associated splicing factor	6.60508	4.81579e-10	9.34162e-08	1482	1	F:molecular_function	-	IPR000504 (SMART); IPR000504 (PFAM); IPR012677 (G3DSA:3.30.70.GENE3D); IPR000504 (PROSITE_PROFILES); IPR012677 (SUPERFAMILY)
TR3965|c2_g1_i1	polymerase delta-interacting protein 3-like	8.18491	4.43365e-05	0.00222247	981	1	F:molecular_function	-	IPR000504 (SMART); IPR012677 (G3DSA:3.30.70.GENE3D); IPR000504 (PFAM); PTHR19965:SF34 (PANTHER); PTHR19965 (PANTHER); PTHR19965 (PANTHER); PTHR19965:SF34 (PANTHER); IPR000504 (PROSITE_PROFILES); IPR012677 (SUPERFAMILY)
TR43558|c0_g1_i1	PREDICTED: uncharacterized protein LOC107045241	5.30135	4.60215e-06	0.000316691	1404	1	F:molecular_function	-	IPR012337 (G3DSA:3.30.420.GENE3D); PTHR19277:SF104 (PANTHER); PTHR19277 (PANTHER); IPR012337 (SUPERFAMILY)
TR4388|c16_g1_i1	whirlin isoform x1	9.65816	1.71307e-08	2.32457e-06	2990	1	F:molecular_function	-	IPR001478 (SMART); IPR001478 (G3DSA:2.30.42.GENE3D); IPR001478 (PFAM); IPR001478 (G3DSA:2.30.42.GENE3D); IPR001478 (G3DSA:2.30.42.GENE3D); PTHR23116 (PANTHER); IPR001478 (PROSITE_PROFILES); IPR001478 (PROSITE_PROFILES); IPR001478 (PROSITE_PROFILES); IPR001478 (SUPERFAMILY); IPR001478 (SUPERFAMILY); IPR001478 (SUPERFAMILY)
TR45167|c1_g2_i2	kielin chordin-like protein isoform x2	9.35901	9.44202e-08	1.06553e-05	1367	1	F:molecular_function	-	IPR000742 (SMART); G3DSA:2.10.25.10 (GENE3D); IPR001846 (PFAM); PTHR11339:SF285 (PANTHER); PTHR11339 (PANTHER); PTHR11339 (PANTHER); PTHR11339:SF285 (PANTHER); IPR013032 (PROSITE_PATTERNS); IPR000742 (PROSITE_PROFILES); IPR001846 (PROSITE_PROFILES); SSF57196 (SUPERFAMILY)
TR49009|c9_g1_i7	voltage-dependent calcium channel subunit alpha-2 delta-3 isoform x2	9.25865	1.66059e-07	1.75652e-05	4096	1	F:molecular_function	-	IPR002035 (SMART); IPR033479 (PFAM); G3DSA:3.30.450.20 (GENE3D); IPR013680 (PFAM); IPR013608 (PFAM); IPR009072 (G3DSA:1.10.20.GENE3D); IPR002035 (G3DSA:3.40.50.GENE3D); PTHR10166 (PANTHER); PTHR10166 (PANTHER); PTHR10166:SF29 (PANTHER); PTHR10166:SF29 (PANTHER); SIGNAL_PEPTIDE_N_REGION (PHOBIUS); SIGNAL_PEPTIDE_C_REGION (PHOBIUS); NON_CYTOPLASMIC_DOMAIN (PHOBIUS); SIGNAL_PEPTIDE (PHOBIUS); SIGNAL…
TR37577|c0_g1_i2	probable 28s rrna (cytosine-c )-methyltransferase	8.78892	2.00232e-06	0.000152045	2001	1	F:methyltransferase activity	-	IPR023267 (PRINTS); IPR029063 (G3DSA:3.40.50.GENE3D); IPR001678 (PFAM); PTHR22807 (PANTHER); PTHR22807:SF4 (PANTHER); PTHR22807:SF4 (PANTHER); PTHR22807 (PANTHER); IPR001678 (PROSITE_PROFILES); IPR029063 (SUPERFAMILY)
TR19202|c0_g1_i2	vascular endothelial growth factor receptor 1-like isoform x1	8.21583	3.6337e-05	0.00189097	663	2	F:kinase activity; P:biological_process	-	no IPS match
TR21226|c0_g1_i1	nfu1 iron-sulfur cluster scaffold mitochondrial-like	10.9425	8.07038e-12	2.58289e-09	441	4	F:ion binding; P:biosynthetic process; P:cellular component assembly; F:molecular_function	-	IPR001075 (PFAM); PIRSF036773 (PIRSF); IPR017065 (PTHR11178:PANTHER); PTHR11178 (PANTHER); IPR001075 (PRODOM); SSF117916 (SUPERFAMILY)
TR28351|c2_g1_i2	5-phosphohydroxy-l-lysine phospho-lyase	4.30009	1.67225e-06	0.000100199	1622	2	F:ion binding; F:molecular_function	-	IPR005814 (PFAM); IPR015422 (G3DSA:3.90.1150.GENE3D); IPR015421 (G3DSA:3.40.640.GENE3D); PTHR11986:SF63 (PANTHER); IPR005814 (PANTHER); IPR005814 (PROSITE_PATTERNS); IPR015424 (SUPERFAMILY)
TR23225|c0_g2_i6	serine threonine-protein kinase ick-like isoform x2	8.84933	1.48719e-06	0.000116557	1531	3	F:ion binding; F:kinase activity; P:cellular protein modification process	-	IPR002290 (SMART); G3DSA:3.30.200.20 (GENE3D); IPR000719 (PFAM); G3DSA:1.10.510.10 (GENE3D); PTHR24055:SF194 (PANTHER); PTHR24055 (PANTHER); IPR008271 (PROSITE_PATTERNS); IPR017441 (PROSITE_PATTERNS); IPR000719 (PROSITE_PROFILES); IPR011009 (SUPERFAMILY)
TR45475|c0_g2_i2	ras-related protein m-ras-like	8.61426	5.06486e-06	0.000338376	801	5	F:ion binding; C:intracellular; C:cellular_component; P:signal transduction; P:transport	-	PR00449 (PRINTS); SM00175 (SMART); SM00174 (SMART); SM00173 (SMART); IPR027417 (G3DSA:3.40.50.GENE3D); IPR001806 (PFAM); IPR005225 (TIGRFAM); PTHR24070:SF268 (PANTHER); IPR020849 (PANTHER); IPR020849 (PROSITE_PROFILES); IPR027417 (SUPERFAMILY)
TR27559|c2_g1_i4	rho gtpase-activating protein 190 isoform x1	9.01672	6.47785e-07	5.68978e-05	5248	3	F:ion binding; C:cellular_component; P:signal transduction	-	Coil (COILS); IPR000198 (SMART); IPR020849 (SMART); IPR000198 (G3DSA:1.10.555.GENE3D); IPR000198 (PFAM); IPR032835 (PFAM); IPR027417 (G3DSA:3.40.50.GENE3D); IPR001806 (PFAM); PTHR23175:SF4 (PANTHER); PTHR23175 (PANTHER); PTHR23175:SF4 (PANTHER); PTHR23175 (PANTHER); PTHR23175 (PANTHER); PTHR23175:SF4 (PANTHER); IPR002713 (PROSITE_PROFILES); IPR002713 (PROSITE_PROFILES); IPR000198 (PROSITE_PROFILE…
TR39735|c0_g1_i1	PREDICTED: uncharacterized protein LOC103574271, partial	4.6097	2.43812e-06	0.000181141	2703	1	F:ion binding	-	PTHR31912 (PANTHER); PTHR31912:SF16 (PANTHER); IPR007087 (PROSITE_PATTERNS); IPR007087 (PROSITE_PROFILES)
TR31615|c7_g1_i1	ubiquitin carboxyl-terminal hydrolase 17-like partial	10.4647	1.65936e-10	3.67174e-08	1149	6	F:hydrolase activity; ; P:ubiquitin-dependent protein catabolic process; F:helicase activity; F:ATP binding; P:metabolic process		no IPS match
TR16846|c1_g2_i1	glucosylceramidase-like isoform x1	2.7868	9.9471e-05	0.00433694	1519	3	F:hydrolase activity, acting on glycosyl bonds; P:carbohydrate metabolic process; P:lipid metabolic process	EC:3.2.1.45	IPR001139 (PRINTS); IPR013780 (G3DSA:2.60.40.GENE3D); IPR001139 (PFAM); IPR013781 (G3DSA:3.20.20.GENE3D); IPR001139 (PANTHER); PTHR11069:SF9 (PANTHER); SIGNAL_PEPTIDE_C_REGION (PHOBIUS); SIGNAL_PEPTIDE_H_REGION (PHOBIUS); NON_CYTOPLASMIC_DOMAIN (PHOBIUS); SIGNAL_PEPTIDE (PHOBIUS); SIGNAL_PEPTIDE_N_REGION (PHOBIUS); SignalP-noTM (SIGNALP_EUK); IPR017853 (SUPERFAMILY); SSF51011 (SUPERFAMILY)
TR33199|c5_g1_i4	multidrug resistance-associated protein 1 isoform x2	3.09903	5.96973e-05	0.0028748	1692	6	F:ATPase activity; F:transmembrane transporter activity; P:transmembrane transport; F:ion binding; C:cellular_component; P:biological_process	-	IPR003593 (SMART); G3DSA:1.20.1560.10 (GENE3D); IPR003439 (PFAM); IPR027417 (G3DSA:3.40.50.GENE3D); IPR011527 (PFAM); PTHR24223 (PANTHER); IPR017871 (PROSITE_PATTERNS); TRANSMEMBRANE (PHOBIUS); NON_CYTOPLASMIC_DOMAIN (PHOBIUS); NON_CYTOPLASMIC_DOMAIN (PHOBIUS); TRANSMEMBRANE (PHOBIUS); TRANSMEMBRANE (PHOBIUS); CYTOPLASMIC_DOMAIN (PHOBIUS); CYTOPLASMIC_DOMAIN (PHOBIUS); IPR003439 (PROSITE_PROFILES…
TR45093|c0_g1_i4	adamts-like protein 4 isoform x1	2.99903	9.05157e-05	0.00397011	3097	3	C:proteinaceous extracellular matrix; F:ion binding; F:peptidase activity	EC:3.4.24	IPR013273 (PRINTS); IPR000884 (SMART); IPR010294 (PFAM); IPR000884 (PFAM); G3DSA:2.20.100.10 (GENE3D); PTHR13723 (PANTHER); IPR000884 (PROSITE_PROFILES); IPR000884 (PROSITE_PROFILES); IPR000884 (PROSITE_PROFILES); IPR000884 (PROSITE_PROFILES); IPR000884 (PROSITE_PROFILES); IPR000884 (SUPERFAMILY); IPR000884 (SUPERFAMILY); IPR000884 (SUPERFAMILY); IPR000884 (SUPERFAMILY); IPR000884 (SUPERFAMILY)
TR3977|c8_g1_i8	cyclin-k-like isoform x1	6.60065	7.92707e-06	0.000402944	1366	6	C:nucleus; F:enzyme binding; P:cellular protein modification process; P:cell cycle; P:cellular nitrogen compound metabolic process; P:biosynthetic process	-	IPR013763 (SMART); IPR013763 (G3DSA:1.10.472.GENE3D); IPR004367 (PFAM); IPR006671 (PFAM); IPR015429 (PIRSF); PTHR10026:SF71 (PANTHER); PTHR10026 (PANTHER); IPR013763 (SUPERFAMILY); IPR013763 (SUPERFAMILY)
TR47041|c0_g1_i4	PREDICTED: uncharacterized protein LOC106789540 isoform X2	9.2134	2.09704e-07	2.14099e-05	1064	1	C:extracellular region	-	no IPS match
TR18593|c0_g1_i1	mfs-type transporter slc18b1-like	2.80418	0.000147265	0.0059269	1634	2	C:cellular_component; P:transmembrane transport	-	G3DSA:1.20.1250.20 (GENE3D); IPR011701 (PFAM); G3DSA:1.20.1250.20 (GENE3D); PTHR23506:SF2 (PANTHER); PTHR23506 (PANTHER); TRANSMEMBRANE (PHOBIUS); CYTOPLASMIC_DOMAIN (PHOBIUS); TRANSMEMBRANE (PHOBIUS); TRANSMEMBRANE (PHOBIUS); TRANSMEMBRANE (PHOBIUS); CYTOPLASMIC_DOMAIN (PHOBIUS); NON_CYTOPLASMIC_DOMAIN (PHOBIUS); NON_CYTOPLASMIC_DOMAIN (PHOBIUS); TRANSMEMBRANE (PHOBIUS); CYTOPLASMIC_DOMAIN (PHOB…
TR27559|c2_g1_i5	rho gtpase-activating protein 190 isoform x5	8.30313	7.70819e-06	0.000485672	5050	3	C:cellular_component; F:ion binding; P:signal transduction	-	Coil (COILS); IPR000198 (SMART); IPR020849 (SMART); IPR001806 (PFAM); IPR000198 (G3DSA:1.10.555.GENE3D); IPR032835 (PFAM); IPR027417 (G3DSA:3.40.50.GENE3D); IPR000198 (PFAM); PTHR23175 (PANTHER); PTHR23175 (PANTHER); PTHR23175 (PANTHER); PTHR23175:SF4 (PANTHER); PTHR23175:SF4 (PANTHER); PTHR23175:SF4 (PANTHER); IPR002713 (PROSITE_PROFILES); IPR002713 (PROSITE_PROFILES); IPR000198 (PROSITE_PROFILE…
TR1453|c1_g1_i4	PREDICTED: uncharacterized protein LOC106653664	5.04147	2.65171e-08	3.34305e-06	4339	0	-		Coil (COILS); Coil (COILS); Coil (COILS); Coil (COILS); Coil (COILS); NON_CYTOPLASMIC_DOMAIN (PHOBIUS); SIGNAL_PEPTIDE_H_REGION (PHOBIUS); SIGNAL_PEPTIDE_N_REGION (PHOBIUS); SIGNAL_PEPTIDE_C_REGION (PHOBIUS); SIGNAL_PEPTIDE (PHOBIUS); SignalP-noTM (SIGNALP_EUK)
TR1453|c1_g1_i7	PREDICTED: uncharacterized protein LOC106677054	4.51782	2.81605e-08	3.46734e-06	2643	0	-		NON_CYTOPLASMIC_DOMAIN (PHOBIUS); SIGNAL_PEPTIDE_C_REGION (PHOBIUS); SIGNAL_PEPTIDE_N_REGION (PHOBIUS); SIGNAL_PEPTIDE (PHOBIUS); SIGNAL_PEPTIDE_H_REGION (PHOBIUS); SignalP-noTM (SIGNALP_EUK)
TR1515|c1_g1_i13	pol polyprotein	5.80046	5.29649e-07	4.765e-05	898	0	-		no IPS match
TR1515|c1_g1_i7	gag-pol polyprotein	3.09919	8.38542e-05	0.00364791	4117	0	-		Coil (COILS); PTHR33327:SF2 (PANTHER); PTHR33327 (PANTHER); SIGNAL_PEPTIDE (PHOBIUS); SIGNAL_PEPTIDE_N_REGION (PHOBIUS); SIGNAL_PEPTIDE_H_REGION (PHOBIUS); NON_CYTOPLASMIC_DOMAIN (PHOBIUS); SIGNAL_PEPTIDE_C_REGION (PHOBIUS); SignalP-TM (SIGNALP_GRAM_POSITIVE)
TR15754|c0_g1_i1	hypothetical protein	7.5347	6.48856e-08	5.45669e-06	2540	0	-		no IPS match
TR18782|c1_g1_i1	serine arginine repetitive matrix protein 2 isoform x2	11.378	4.73186e-13	2.57232e-10	585	0	-		no IPS match
TR19304|c2_g1_i2	maltase- intestinal-like isoform x1	3.1733	0.000107126	0.00456299	1441	0	-		no IPS match
TR20498|c0_g2_i1	hypothetical protein X777_13718	10.2422	8.69482e-20	3.73973e-16	2384	0	-		PTHR33053 (PANTHER); PTHR33053:SF3 (PANTHER); TRANSMEMBRANE (PHOBIUS); NON_CYTOPLASMIC_DOMAIN (PHOBIUS); CYTOPLASMIC_DOMAIN (PHOBIUS)
TR23641|c0_g2_i1	PREDICTED: uncharacterized protein LOC105832528 isoform X1	6.28409	1.13092e-08	1.61358e-06	1459	0	-		no IPS match
TR24664|c5_g2_i2	rna-directed dna polymerase from mobile element jockey-like	6.43326	3.24332e-11	6.74864e-09	4468	0	-		IPR005135 (PFAM); IPR000477 (PFAM); G3DSA:3.30.70.270 (GENE3D); IPR005135 (G3DSA:3.60.10.GENE3D); PTHR19446 (PANTHER); IPR000477 (PROSITE_PROFILES); SSF56672 (SUPERFAMILY); IPR005135 (SUPERFAMILY)
TR24719|c12_g1_i5	PREDICTED: ubiquilin-1	10.7447	2.82552e-11	7.5708e-09	382	0	-		NON_CYTOPLASMIC_DOMAIN (PHOBIUS); NON_CYTOPLASMIC_DOMAIN (PHOBIUS); TRANSMEMBRANE (PHOBIUS); TRANSMEMBRANE (PHOBIUS); CYTOPLASMIC_DOMAIN (PHOBIUS); TRANSMEMBRANE (PHOBIUS); CYTOPLASMIC_DOMAIN (PHOBIUS); CYTOPLASMIC_DOMAIN (PHOBIUS); TRANSMEMBRANE (PHOBIUS); TMhelix (TMHMM); TMhelix (TMHMM); TMhelix (TMHMM)
TR28744|c2_g1_i7	protein homolog isoform x9	5.32573	3.19328e-09	5.35297e-07	1975	0	-		SignalP-noTM (SIGNALP_EUK)
TR28807|c4_g2_i2	regucalcin-like isoform x1	2.89038	8.28241e-05	0.00314267	1344	0	-		IPR005511 (PRINTS); IPR011042 (G3DSA:2.120.10.GENE3D); IPR013658 (PFAM); PTHR10907 (PANTHER); NON_CYTOPLASMIC_DOMAIN (PHOBIUS); CYTOPLASMIC_DOMAIN (PHOBIUS); TRANSMEMBRANE (PHOBIUS); SignalP-noTM (SIGNALP_EUK); SSF63829 (SUPERFAMILY)
TR29461|c0_g1_i1	kda protein in nof-fb transposable element	10.812	1.84414e-11	5.20061e-09	1210	0	-		no IPS match
TR32664|c2_g1_i3	zinc finger matrin-type protein cg9776-like isoform x2	8.68226	3.68162e-06	0.000260545	470	0	-		SignalP-TM (SIGNALP_GRAM_POSITIVE)
TR32912|c2_g2_i1	rna-directed dna polymerase from mobile element jockey-like	7.18932	2.67704e-06	0.00018196	1925	0	-		Coil (COILS); Coil (COILS); IPR000477 (PFAM); PTHR19446:SF371 (PANTHER); PTHR19446:SF371 (PANTHER); PTHR19446 (PANTHER); PTHR19446 (PANTHER); IPR000477 (PROSITE_PROFILES); SSF56672 (SUPERFAMILY)
TR33886|c0_g2_i1	shootin-1 isoform x2	11.1884	1.64247e-12	6.89159e-10	1210	0	-		Coil (COILS); Coil (COILS); Coil (COILS); Coil (COILS); Coil (COILS)
TR39088|c1_g1_i4	transmembrane protein c9orf91 homolog isoform x1	6.6466	2.9706e-05	0.00155893	486	0	-		PTHR31193 (PANTHER); PTHR31193:SF1 (PANTHER)
TR40048|c1_g1_i1	nadph--cytochrome p450 reductase isoform x1	7.60796	4.38471e-08	3.83485e-06	345	0	-		G3DSA:3.40.50.80 (GENE3D); PTHR19384 (PANTHER); SSF52343 (SUPERFAMILY)
TR41835|c22_g1_i1	transcription factor iiia-like	6.46717	7.73703e-05	0.00339914	1123	0	-		no IPS match
TR43984|c1_g1_i1	hypothetical protein EAG_06621	8.55734	9.84223e-10	1.55872e-07	1597	0	-		PTHR23080 (PANTHER); PTHR23080:SF15 (PANTHER)
TR4419|c2_g2_i8	oxidation resistance protein 1 isoform x5	10.1253	1.33445e-09	2.34155e-07	2313	0	-		IPR018392 (SMART); IPR018392 (G3DSA:3.10.350.GENE3D); IPR018392 (PFAM); PTHR23354 (PANTHER); PTHR23354:SF62 (PANTHER); IPR018392 (SUPERFAMILY)
TR44257|c0_g2_i1	transcriptional regulator gzf3	5.19131	7.59846e-08	8.67125e-06	878	0	-		Coil (COILS)
TR4433|c0_g2_i1	cytochrome p450 4c1-like	2.66456	0.000149327	0.00546319	1705	0	-		SIGNAL_PEPTIDE_N_REGION (PHOBIUS); NON_CYTOPLASMIC_DOMAIN (PHOBIUS); SIGNAL_PEPTIDE_C_REGION (PHOBIUS); SIGNAL_PEPTIDE (PHOBIUS); SIGNAL_PEPTIDE_H_REGION (PHOBIUS); SignalP-noTM (SIGNALP_EUK)
TR45088|c5_g1_i3	PREDICTED: uncharacterized protein LOC105263709 isoform X3	6.76762	4.72657e-05	0.00230508	2902	0	-		no IPS match
TR46137|c0_g2_i1	PREDICTED: uncharacterized protein LOC105273744	9.45971	1.64499e-12	6.92671e-10	2538	0	-		IPR009667 (PFAM); IPR004242 (PFAM); PTHR33053 (PANTHER); CYTOPLASMIC_DOMAIN (PHOBIUS); TRANSMEMBRANE (PHOBIUS); NON_CYTOPLASMIC_DOMAIN (PHOBIUS); TMhelix (TMHMM)
TR48264|c0_g1_i1	kda protein in nof-fb transposable element	11.0958	2.95979e-12	1.10144e-09	1658	0	-		no IPS match
TR5198|c1_g2_i2	rna-directed dna polymerase from mobile element jockey-like	5.04648	9.84658e-09	1.2088e-06	1862	0	-		Coil (COILS); IPR000477 (PFAM); PTHR19446:SF244 (PANTHER); PTHR19446 (PANTHER); PTHR19446:SF244 (PANTHER); PTHR19446 (PANTHER); IPR000477 (PROSITE_PROFILES); SSF56672 (SUPERFAMILY); IPR005135 (SUPERFAMILY)
TR52028|c0_g1_i1	PREDICTED: uncharacterized protein LOC105555675	5.71328	2.0923e-08	2.69571e-06	3032	0	-		PTHR33053 (PANTHER); PTHR33053:SF8 (PANTHER)
TR5241|c0_g1_i1	hypothetical protein SINV_09195	12.3308	8.27267e-16	1.45032e-12	2513	0	-		Coil (COILS); IPR004242 (PFAM); IPR009667 (PFAM); PTHR33053:SF8 (PANTHER); PTHR33053 (PANTHER)
TR53758|c1_g1_i2	PREDICTED: uncharacterized protein LOC105272388 isoform X3	12.0361	5.98373e-15	7.77065e-12	1511	0	-		Coil (COILS); Coil (COILS); Coil (COILS); Coil (COILS)
TR5569|c0_g1_i4	PREDICTED: uncharacterized protein LOC105663391	7.53675	3.0499e-07	3.02705e-05	2328	0	-		IPR008737 (PFAM); PTHR22955 (PANTHER); SIGNAL_PEPTIDE_C_REGION (PHOBIUS); SIGNAL_PEPTIDE_H_REGION (PHOBIUS); SIGNAL_PEPTIDE_N_REGION (PHOBIUS); SIGNAL_PEPTIDE (PHOBIUS); NON_CYTOPLASMIC_DOMAIN (PHOBIUS)
TR5623|c19_g1_i1	protein prrc2a isoform x4	11.8192	2.54753e-14	2.48254e-11	1883	0	-		Coil (COILS)
TR8361|c0_g1_i1	PREDICTED: uncharacterized protein LOC105272109 isoform X4	3.27778	2.70799e-05	0.00116719	3466	0	-		IPR004242 (PFAM); PTHR33053 (PANTHER)
TR8453|c0_g1_i1	nuclease harbi1	6.6243	4.40399e-05	0.00217232	1106	0	-		IPR027806 (PFAM); PTHR22930 (PANTHER)
TR8556|c0_g1_i9	PREDICTED: uncharacterized protein LOC103572407 isoform X2	7.34087	2.75803e-05	0.0014561	1601	0	-		IPR032062 (PFAM)
TR8991|c0_g1_i1	PREDICTED: uncharacterized protein LOC102674885	3.2995	5.87619e-06	0.000388267	541	0	-		no IPS match

## Sheet: Ae - AP up - Head
Suplementary table 1, page 3: genes up-regulated in Heads of Aphidius ervi - AP compared to Aphidius ervi - SA
ID	Sequence description	LogFC	PValue	FDR	Seq Length	#Gos	Gos	Enzyme Codes	InterProScan
TR3953|c4_g1_i15	sorbin and sh3 domain-containing protein 1 isoform x3	14.7696	5.90341e-23	3.40698e-19	3531	4	F:molecular_function; P:cell motility; P:cell adhesion; P:cytoskeleton organization	-	Coil (COILS); IPR001452 (PRINTS); IPR001478 (SMART); IPR001452 (SMART); IPR003127 (PFAM); IPR001452 (PFAM); IPR011511 (PFAM); IPR001452 (PFAM); IPR001478 (G3DSA:2.30.42.GENE3D); G3DSA:2.30.30.40 (GENE3D); G3DSA:2.30.30.40 (GENE3D); IPR001478 (PFAM); PTHR10663 (PANTHER); PTHR10663 (PANTHER); IPR028516 (PTHR10663:PANTHER); IPR028516 (PTHR10663:PANTHER); IPR001478 (PROSITE_PROFILES); IPR001452 (PROS…
TR27559|c2_g1_i1	rho gtpase-activating protein 190 isoform x1	14.0696	6.385e-22	1.1905e-18	5230	3	F:ion binding; C:cellular_component; P:signal transduction	-	Coil (COILS); IPR000198 (SMART); IPR020849 (SMART); IPR032835 (PFAM); IPR027417 (G3DSA:3.40.50.GENE3D); IPR001806 (PFAM); IPR000198 (G3DSA:1.10.555.GENE3D); IPR000198 (PFAM); PTHR23175 (PANTHER); PTHR23175 (PANTHER); PTHR23175:SF4 (PANTHER); PTHR23175 (PANTHER); PTHR23175:SF4 (PANTHER); PTHR23175:SF4 (PANTHER); IPR002713 (PROSITE_PROFILES); IPR002713 (PROSITE_PROFILES); IPR000198 (PROSITE_PROFILE…
TR42270|c3_g5_i10	calcium-activated potassium channel slowpoke	14.0441	8.40525e-21	1.52156e-17	1568	4	C:protein complex; C:plasma membrane; F:transmembrane transporter activity; P:transport; P:transmembrane transport	-	IPR028325 (PRINTS); IPR005821 (PFAM); G3DSA:1.10.287.70 (GENE3D); PTHR10027 (PANTHER); IPR024939 (PTHR10027:PANTHER); NON_CYTOPLASMIC_DOMAIN (PHOBIUS); TRANSMEMBRANE (PHOBIUS); CYTOPLASMIC_DOMAIN (PHOBIUS); CYTOPLASMIC_DOMAIN (PHOBIUS); TRANSMEMBRANE (PHOBIUS); NON_CYTOPLASMIC_DOMAIN (PHOBIUS); TRANSMEMBRANE (PHOBIUS); NON_CYTOPLASMIC_DOMAIN (PHOBIUS); CYTOPLASMIC_DOMAIN (PHOBIUS); TRANSMEMBRANE …
TR16911|c9_g1_i6	dynein heavy cytoplasmic isoform x2	13.9704	1.94563e-20	2.81156e-17	3872	5	P:biological_process; F:ATPase activity; F:ion binding; F:molecular_function; C:cytoskeleton; C:protein complex	EC:3.6.1.3	Coil (COILS); IPR003593 (SMART); PF12775 (PFAM); IPR027417 (G3DSA:3.40.50.GENE3D); IPR011704 (PFAM); IPR027417 (G3DSA:3.40.50.GENE3D); IPR024317 (PFAM); IPR024743 (PFAM); PTHR10676:SF28 (PANTHER); PTHR10676:SF28 (PANTHER); IPR026983 (PANTHER); IPR026983 (PANTHER); IPR026983 (PANTHER); IPR027417 (SUPERFAMILY); IPR027417 (SUPERFAMILY); IPR027417 (SUPERFAMILY)
TR21285|c2_g1_i1	oxysterol-binding protein 8 isoform x3	13.3699	3.4189e-19	2.2153e-16	3456	0	-		no IPS match
TR27544|c9_g3_i1	bromodomain adjacent to zinc finger domain protein 2b-like isoform x7	13.3088	3.89527e-18	2.41548e-15	3565	2	C:nucleus; F:DNA binding	-	Coil (COILS); Coil (COILS); Coil (COILS); IPR018500 (SMART); IPR001739 (SMART); IPR004022 (PFAM); IPR001739 (PFAM); IPR007889 (PFAM); IPR001739 (G3DSA:3.30.890.GENE3D); IPR009057 (G3DSA:1.10.10.GENE3D); PTHR22880:SF34 (PANTHER); PTHR22880:SF34 (PANTHER); PTHR22880 (PANTHER); PTHR22880 (PANTHER); IPR001739 (PROSITE_PROFILES); IPR018501 (PROSITE_PROFILES); IPR009057 (SUPERFAMILY); IPR016177 (SUPERF…
TR18782|c1_g2_i1	serine arginine repetitive matrix protein 2 isoform x2	13.2951	8.56525e-19	6.7677e-16	597	0	-		no IPS match
TR39674|c7_g9_i8	choline ethanolamine kinase isoform x1	13.1136	5.241e-19	5.038e-16	1755	0	-		NON_CYTOPLASMIC_DOMAIN (PHOBIUS); CYTOPLASMIC_DOMAIN (PHOBIUS); TRANSMEMBRANE (PHOBIUS); TMhelix (TMHMM)
TR41810|c12_g5_i6	vinculin isoform x5	12.8451	1.59e-18	1.0955e-15	3722	4	P:cell adhesion; F:cytoskeletal protein binding; F:structural molecule activity; C:cytoskeleton	-	PR00806 (PRINTS); G3DSA:1.20.120.230 (GENE3D); G3DSA:1.20.120.230 (GENE3D); G3DSA:1.20.120.230 (GENE3D); G3DSA:1.20.120.230 (GENE3D); IPR006077 (PFAM); G3DSA:1.20.1490.10 (GENE3D); PTHR18914:SF1 (PANTHER); IPR006077 (PANTHER); PTHR18914:SF1 (PANTHER); IPR006077 (PANTHER); PTHR18914:SF1 (PANTHER); IPR006077 (PANTHER); IPR000633 (PROSITE_PATTERNS); IPR006077 (SUPERFAMILY); IPR006077 (SUPERFAMILY); …
TR4006|c7_g2_i9	down syndrome cell adhesion molecule-like protein dscam2 isoform x30	12.7633	2.79e-18	1.765e-15	2893	1	F:molecular_function	-	IPR003961 (SMART); IPR003599 (SMART); IPR003598 (SMART); IPR003961 (PFAM); IPR013783 (G3DSA:2.60.40.GENE3D); IPR013783 (G3DSA:2.60.40.GENE3D); IPR013098 (PFAM); IPR013783 (G3DSA:2.60.40.GENE3D); IPR021012 (PFAM); IPR013783 (G3DSA:2.60.40.GENE3D); IPR013783 (G3DSA:2.60.40.GENE3D); PTHR10489:SF525 (PANTHER); PTHR10489 (PANTHER); PTHR10489 (PANTHER); PTHR10489:SF525 (PANTHER); PTHR10489 (PANTHER); T…
TR36885|c0_g2_i1	oxidoreductase glyr1 homolog	12.7366	1.2032e-17	6.361e-15	1879	6	F:oxidoreductase activity; F:molecular_function; P:biological_process; P:small molecule metabolic process; P:cellular nitrogen compound metabolic process; P:carbohydrate metabolic process; P:catabolic process; P:cofactor metabolic process	EC:1.1.1.44	IPR000313 (SMART); G3DSA:2.30.30.160 (GENE3D); IPR016040 (G3DSA:3.40.50.GENE3D); IPR006115 (PFAM); IPR013328 (G3DSA:1.10.1040.GENE3D); IPR000313 (PFAM); IPR029154 (PFAM); PTHR22981:SF67 (PANTHER); PTHR22981 (PANTHER); PTHR22981 (PANTHER); IPR000313 (PROSITE_PROFILES); IPR016040 (SUPERFAMILY); SSF63748 (SUPERFAMILY); IPR008927 (SUPERFAMILY)
TR3326|c0_g1_i4	protein-methionine sulfoxide oxidase mical isoform x2	12.7142	2.86e-15	7.75002e-13	1216	0	-		Coil (COILS); Coil (COILS); IPR022735 (PFAM); CYTOPLASMIC_DOMAIN (PHOBIUS); NON_CYTOPLASMIC_DOMAIN (PHOBIUS); TRANSMEMBRANE (PHOBIUS); TMhelix (TMHMM)
TR52610|c0_g1_i1	sodium hydrogen exchanger 7 isoform x4	12.7001	2.1761e-17	8.1785e-15	2555	4	P:homeostatic process; P:transport; F:transmembrane transporter activity; C:cellular_component; P:transmembrane transport	-	IPR002090 (PRINTS); IPR004709 (PRINTS); IPR004709 (TIGRFAM); IPR006153 (PFAM); PTHR10110:SF94 (PANTHER); PTHR10110:SF94 (PANTHER); IPR018422 (PANTHER); IPR018422 (PANTHER); NON_CYTOPLASMIC_DOMAIN (PHOBIUS); CYTOPLASMIC_DOMAIN (PHOBIUS); TRANSMEMBRANE (PHOBIUS); CYTOPLASMIC_DOMAIN (PHOBIUS); TRANSMEMBRANE (PHOBIUS); TRANSMEMBRANE (PHOBIUS); TRANSMEMBRANE (PHOBIUS); TRANSMEMBRANE (PHOBIUS); TRANSME…
TR42263|c2_g1_i9	mitogen-activated protein kinase-binding protein 1 isoform x2	12.6727	9.5e-18	4.035e-15	1575	0	-		no IPS match
TR33886|c0_g1_i1	shootin-1 isoform x1	12.2843	9.31375e-16	2.9466e-13	1210	0	-		Coil (COILS); Coil (COILS); Coil (COILS); Coil (COILS); Coil (COILS)
TR9088|c5_g1_i4	heterogeneous nuclear ribonucleoprotein k	12.1626	1.655e-16	6.35e-14	952	2	C:cellular_component; C:intracellular; F:RNA binding	-	CYTOPLASMIC_DOMAIN (PHOBIUS); NON_CYTOPLASMIC_DOMAIN (PHOBIUS); TRANSMEMBRANE (PHOBIUS); TMhelix (TMHMM)
TR52097|c0_g1_i3	synaptojanin-1 isoform x1	12.0671	1.2103e-15	3.5815e-13	2918	2	P:lipid metabolic process; F:molecular_function	EC:3.1	IPR000300 (SMART); IPR015047 (PFAM); IPR005135 (PFAM); IPR005135 (G3DSA:3.60.10.GENE3D); IPR002013 (PFAM); PTHR11200:SF146 (PANTHER); PTHR11200 (PANTHER); IPR002013 (PROSITE_PROFILES); IPR005135 (SUPERFAMILY)
TR42263|c2_g1_i7	mitogen-activated protein kinase-binding protein 1-like isoform x4	11.8508	2.33002e-13	4.26008e-11	2529	0	-		no IPS match
TR53811|c0_g2_i6	e3 ubiquitin-protein ligase hectd1 isoform x4	11.7646	3.2e-15	8.905e-13	6359	2	F:molecular_function; F:ion binding; P:cellular protein modification process	-	IPR002110 (SMART); IPR008979 (G3DSA:2.60.120.GENE3D); IPR012919 (PFAM); IPR010606 (PFAM); IPR011989 (G3DSA:1.25.10.GENE3D); IPR020683 (PFAM); IPR020683 (G3DSA:1.25.40.GENE3D); PTHR11254:SF322 (PANTHER); PTHR11254 (PANTHER); PTHR11254:SF322 (PANTHER); PTHR11254:SF322 (PANTHER); PTHR11254 (PANTHER); IPR002110 (PROSITE_PROFILES); IPR020683 (PROSITE_PROFILES); IPR002110 (PROSITE_PROFILES); IPR010606 …
TR23225|c0_g2_i1	serine threonine-protein kinase ick-like isoform x1	11.7473	2.825e-15	7.285e-13	1549	3	F:kinase activity; P:cellular protein modification process; F:ion binding	-	IPR002290 (SMART); G3DSA:1.10.510.10 (GENE3D); G3DSA:3.30.200.20 (GENE3D); IPR000719 (PFAM); PTHR24055 (PANTHER); PTHR24055:SF194 (PANTHER); IPR008271 (PROSITE_PATTERNS); IPR017441 (PROSITE_PATTERNS); IPR000719 (PROSITE_PROFILES); IPR011009 (SUPERFAMILY)
TR8499|c8_g1_i3	netrin receptor unc5c	11.6391	7.35e-12	7.20001e-10	3422	2	F:molecular_function; P:signal transduction	-	IPR003599 (SMART); IPR000906 (SMART); IPR000488 (SMART); IPR003598 (SMART); IPR000884 (SMART); IPR013098 (PFAM); IPR013783 (G3DSA:2.60.40.GENE3D); IPR011029 (G3DSA:1.10.533.GENE3D); IPR000906 (PFAM); IPR000488 (PFAM); G3DSA:2.20.100.10 (GENE3D); IPR013783 (G3DSA:2.60.40.GENE3D); IPR000884 (PFAM); PTHR12582:SF41 (PANTHER); PTHR12582 (PANTHER); PTHR12582:SF41 (PANTHER); PTHR12582 (PANTHER); PTHR125…
TR13228|c0_g1_i1	proteasome subunit alpha type-3	11.627	4.91365e-14	1.0307e-11	1148	4	C:protein complex; C:intracellular; P:catabolic process; F:peptidase activity	EC:3.4.25	IPR000426 (SMART); IPR000426 (PFAM); IPR001353 (PFAM); IPR029055 (G3DSA:3.60.20.GENE3D); PTHR11599 (PANTHER); PTHR11599:SF10 (PANTHER); IPR000426 (PROSITE_PATTERNS); IPR023332 (PROSITE_PROFILES); IPR029055 (SUPERFAMILY)
TR39792|c0_g2_i1	atp synthase subunit mitochondrial-like	11.559	4.625e-11	3.79e-09	430	0	-		PF05873 (PFAM)
TR45093|c0_g1_i2	adamts-like protein 4 isoform x2	11.4671	3.373e-14	5.605e-12	3186	3	C:proteinaceous extracellular matrix; F:ion binding; F:peptidase activity	EC:3.4.24	IPR013273 (PRINTS); IPR000884 (SMART); IPR000884 (PFAM); G3DSA:2.20.100.10 (GENE3D); IPR010294 (PFAM); PTHR13723 (PANTHER); TRANSMEMBRANE (PHOBIUS); CYTOPLASMIC_DOMAIN (PHOBIUS); NON_CYTOPLASMIC_DOMAIN (PHOBIUS); IPR000884 (PROSITE_PROFILES); IPR000884 (PROSITE_PROFILES); IPR000884 (PROSITE_PROFILES); IPR000884 (PROSITE_PROFILES); IPR000884 (SUPERFAMILY); IPR000884 (SUPERFAMILY); IPR000884 (SUPER…
TR49021|c3_g3_i22	collagen alpha chain cg42342 isoform x9	11.353	4.06e-11	5.55e-09	1393	0	-		IPR008160 (PFAM); PTHR24023 (PANTHER)
TR3945|c7_g1_i2	PREDICTED: uncharacterized protein LOC107036696 isoform X3	11.3484	2.75512e-12	2.97051e-10	1667	0	-		Coil (COILS); Coil (COILS); Coil (COILS); Coil (COILS); Coil (COILS); PTHR21740:SF0 (PANTHER); IPR026163 (PANTHER)
TR9110|c3_g2_i5	t-cell activation mitochondrial isoform x2	11.0517	1.97455e-12	3.1773e-10	1505	0	-		IPR027989 (PFAM); IPR028031 (PFAM); IPR027986 (PANTHER)
TR11878|c8_g1_i2	e3 ubiquitin-protein ligase nedd-4 isoform x1	11.0327	1.045e-10	7.80007e-09	3044	2	F:molecular_function; P:cellular protein modification process	-	IPR000008 (SMART); IPR001202 (SMART); IPR000569 (SMART); IPR001202 (PFAM); G3DSA:2.20.70.10 (GENE3D); IPR000008 (PFAM); IPR000569 (PFAM); G3DSA:2.20.70.10 (GENE3D); G3DSA:3.30.2160.10 (GENE3D); IPR000008 (G3DSA:2.60.40.GENE3D); PTHR11254:SF282 (PANTHER); PTHR11254 (PANTHER); IPR001202 (PROSITE_PATTERNS); IPR001202 (PROSITE_PATTERNS); IPR001202 (PROSITE_PATTERNS); IPR001202 (PROSITE_PROFILES); IPR…
TR16604|c2_g1_i1	PREDICTED: uncharacterized protein LOC103316157	11.0136	5.98e-13	1.0065e-10	1623	0	-		PTHR11514:SF28 (PANTHER); PTHR11514 (PANTHER); PTHR11514:SF28 (PANTHER); PTHR11514 (PANTHER)
TR45475|c0_g2_i1	ras-related protein m-ras-like	11.0019	3.965e-13	6.565e-11	1530	4	F:ion binding; C:intracellular; C:cellular_component; P:signal transduction; P:transport	-	PR00449 (PRINTS); SM00175 (SMART); SM00174 (SMART); SM00173 (SMART); IPR027417 (G3DSA:3.40.50.GENE3D); IPR001806 (PFAM); IPR005225 (TIGRFAM); PTHR24070:SF268 (PANTHER); IPR020849 (PANTHER); IPR020849 (PROSITE_PROFILES); IPR027417 (SUPERFAMILY)
TR16877|c3_g1_i1	hormone receptor 4 isoform x2	10.9167	1.21088e-11	1.13209e-09	1082	0	-		no IPS match
TR41895|c0_g1_i5	PREDICTED: uncharacterized protein LOC103570602 isoform X2	10.8475	5.64735e-12	8.8715e-10	1428	0	-		TRANSMEMBRANE (PHOBIUS); CYTOPLASMIC_DOMAIN (PHOBIUS); NON_CYTOPLASMIC_DOMAIN (PHOBIUS); TRANSMEMBRANE (PHOBIUS); CYTOPLASMIC_DOMAIN (PHOBIUS); TMhelix (TMHMM); TMhelix (TMHMM)
TR13285|c0_g1_i3	mucin-5ac isoform x5	10.4953	1.496e-11	2.109e-09	571	0	-		no IPS match
TR16826|c0_g1_i1	prenylcysteine oxidase-like	10.4836	9.7806e-11	1.26399e-08	995	4	P:biological_process; P:sulfur compound metabolic process; P:cellular amino acid metabolic process; P:catabolic process; F:oxidoreductase activity	EC:1.8.3.5	PF13450 (PFAM); IPR023753 (G3DSA:3.50.50.GENE3D); G3DSA:3.90.660.10 (GENE3D); IPR010795 (PFAM); IPR017046 (PANTHER); SIGNAL_PEPTIDE (PHOBIUS); SIGNAL_PEPTIDE_N_REGION (PHOBIUS); SIGNAL_PEPTIDE_C_REGION (PHOBIUS); NON_CYTOPLASMIC_DOMAIN (PHOBIUS); SIGNAL_PEPTIDE_H_REGION (PHOBIUS); SignalP-noTM (SIGNALP_EUK); IPR023753 (SUPERFAMILY)
TR49021|c3_g3_i2	collagen alpha chain cg42342 isoform x11	10.4829	7.9389e-11	6.269e-09	1165	0	-		IPR008160 (PFAM); PTHR24023 (PANTHER)
TR50606|c0_g1_i2	focal adhesion kinase 1 isoform x2	10.4312	3.91501e-09	3.80002e-07	803	0	-		no IPS match
TR53868|c5_g2_i3	caax prenyl protease 1 homolog	10.3712	4.92e-08	3.915e-06	1404	3	C:cellular_component; F:peptidase activity; P:protein maturation	EC:3.4.24	IPR001915 (PFAM); G3DSA:3.30.2010.10 (GENE3D); IPR032456 (PFAM); IPR027057 (PTHR10120:PANTHER); PTHR10120 (PANTHER); CYTOPLASMIC_DOMAIN (PHOBIUS); TRANSMEMBRANE (PHOBIUS); TRANSMEMBRANE (PHOBIUS); NON_CYTOPLASMIC_DOMAIN (PHOBIUS); NON_CYTOPLASMIC_DOMAIN (PHOBIUS); TRANSMEMBRANE (PHOBIUS); CYTOPLASMIC_DOMAIN (PHOBIUS); CYTOPLASMIC_DOMAIN (PHOBIUS); TRANSMEMBRANE (PHOBIUS); TMhelix (TMHMM); TMhelix…
TR1518|c4_g1_i9	restin homolog isoform x6	10.3565	1.725e-07	1.18e-05	4809	0	-		Coil (COILS); Coil (COILS); Coil (COILS); Coil (COILS); Coil (COILS); Coil (COILS); Coil (COILS); Coil (COILS); Coil (COILS); Coil (COILS); Coil (COILS); Coil (COILS); Coil (COILS); Coil (COILS); Coil (COILS); IPR000938 (SMART); IPR000938 (PFAM); IPR032108 (PFAM); IPR000938 (G3DSA:2.30.30.GENE3D); PTHR18916 (PANTHER); PTHR18916 (PANTHER); PTHR18916:SF36 (PANTHER); PTHR18916:SF36 (PANTHER); PTHR18…
TR24650|c2_g1_i14	PREDICTED: uncharacterized protein LOC105698441 isoform X11	10.3454	8.4e-08	3.64e-06	568	0	-		PTHR21119 (PANTHER); PTHR21119:SF5 (PANTHER)
TR41810|c12_g5_i9	vinculin isoform x10	10.184	1.77e-06	5.36648e-05	3558	4	P:cell adhesion; F:cytoskeletal protein binding; F:structural molecule activity; C:cytoskeleton	-	PR00806 (PRINTS); G3DSA:1.20.120.230 (GENE3D); G3DSA:1.20.120.230 (GENE3D); IPR006077 (PFAM); G3DSA:1.20.1490.10 (GENE3D); G3DSA:1.20.120.230 (GENE3D); G3DSA:1.20.120.230 (GENE3D); PTHR18914:SF1 (PANTHER); PTHR18914:SF1 (PANTHER); IPR006077 (PANTHER); PTHR18914:SF1 (PANTHER); IPR006077 (PANTHER); IPR006077 (PANTHER); IPR000633 (PROSITE_PATTERNS); IPR006077 (SUPERFAMILY); IPR006077 (SUPERFAMILY); …
TR24715|c11_g1_i1	mothers against decapentaplegic homolog 4 isoform x2	10.1488	1.477e-10	1.7845e-08	546	0	-		no IPS match
TR34100|c1_g1_i1	transmembrane protein 184b isoform x1	10.0921	1.906e-10	1.581e-08	744	0	-		IPR005178 (PFAM); IPR005178 (PANTHER); PTHR23423:SF32 (PANTHER)
TR31987|c0_g1_i1	zinc finger bed domain-containing protein 1-like	10.0475	9.5865e-10	1.0284e-07	976	1	F:DNA binding	-	IPR025525 (PFAM); PTHR23272 (PANTHER); PTHR23272:SF42 (PANTHER); IPR012337 (SUPERFAMILY)
TR39668|c0_g1_i1	proto-oncogene tyrosine-protein kinase ros isoform x2	9.93798	2.595e-06	0.000129808	760	1	F:molecular_function	-	IPR003961 (SMART); IPR013783 (G3DSA:2.60.40.GENE3D); IPR013783 (G3DSA:2.60.40.GENE3D); IPR003961 (PFAM); IPR003961 (PROSITE_PROFILES); IPR003961 (SUPERFAMILY); IPR003961 (SUPERFAMILY)
TR47041|c0_g1_i5	golgi-associated plant pathogenesis-related protein 1	9.92308	2.3994e-09	2.4229e-07	511	1	C:extracellular region	-	no IPS match
TR34068|c0_g1_i1	serine arginine repetitive matrix protein 1-like isoform x1	9.87566	5.77e-10	5.005e-08	861	0	-		Coil (COILS)
TR42312|c12_g2_i2	sperm-associated antigen 6- partial	9.86708	1.43546e-08	1.24047e-06	1898	0	-		PTHR23314 (PANTHER)
TR35977|c0_g1_i3	flocculation protein flo11	9.84625	6.495e-10	5.775e-08	870	0	-		Coil (COILS)
TR43931|c0_g1_i1	PREDICTED: uncharacterized protein LOC105268841	9.84137	4.74e-06	0.000123368	2118	0	-		no IPS match
TR8996|c0_g1_i1	hypothetical protein RF55_15660	9.83649	2.895e-05	0.000557597	3571	4	F:nuclease activity; F:DNA binding; F:peptidase activity; P:biological_process	EC:3.1; EC:3.4	IPR019080 (PFAM); IPR011604 (G3DSA:3.90.320.GENE3D); IPR003653 (PFAM); SSF54001 (SUPERFAMILY); IPR011335 (SUPERFAMILY)
TR9014|c11_g1_i1	fit family protein cg10671	9.72077	4.4395e-09	4.238e-07	878	2	C:endoplasmic reticulum; P:biological_process	-	IPR019388 (PFAM); PTHR23129:SF0 (PANTHER); IPR019388 (PANTHER); TRANSMEMBRANE (PHOBIUS); CYTOPLASMIC_DOMAIN (PHOBIUS); NON_CYTOPLASMIC_DOMAIN (PHOBIUS); CYTOPLASMIC_DOMAIN (PHOBIUS); TRANSMEMBRANE (PHOBIUS); TRANSMEMBRANE (PHOBIUS); TRANSMEMBRANE (PHOBIUS); NON_CYTOPLASMIC_DOMAIN (PHOBIUS); NON_CYTOPLASMIC_DOMAIN (PHOBIUS); CYTOPLASMIC_DOMAIN (PHOBIUS); TRANSMEMBRANE (PHOBIUS); TMhelix (TMHMM); T…
TR52598|c0_g1_i8	kinesin-like protein kif18a	9.71703	1.28335e-08	6.697e-07	489	0	-		no IPS match
TR32856|c3_g1_i1	zinc finger protein ush	9.64373	1.82065e-08	1.53455e-06	859	1	F:molecular_function	-	IPR015880 (SMART); IPR013087 (G3DSA:3.30.160.GENE3D); PTHR12958 (PANTHER); PTHR12958:SF3 (PANTHER); SSF57667 (SUPERFAMILY); SSF57667 (SUPERFAMILY); SSF57667 (SUPERFAMILY)
TR16604|c1_g1_i1	PREDICTED: uncharacterized protein LOC103571862	9.62848	6.2035e-09	5.6765e-07	1105	0	-		PTHR11514:SF60 (PANTHER); PTHR11514 (PANTHER); CYTOPLASMIC_DOMAIN (PHOBIUS); NON_CYTOPLASMIC_DOMAIN (PHOBIUS); TRANSMEMBRANE (PHOBIUS); TRANSMEMBRANE (PHOBIUS); NON_CYTOPLASMIC_DOMAIN (PHOBIUS); TMhelix (TMHMM)
TR29865|c1_g2_i1	cordon-bleu 1	9.37778	3.725e-05	0.000687339	600	5	P:intracellular signal transduction; F:receptor signaling protein activity; F:actin binding; P:signal transduction; C:intracellular		TRANSMEMBRANE (PHOBIUS); NON_CYTOPLASMIC_DOMAIN (PHOBIUS); CYTOPLASMIC_DOMAIN (PHOBIUS)
TR20498|c2_g1_i1	PREDICTED: uncharacterized protein LOC105571058, partial	9.33573	1.175e-14	2.72e-12	792	0	-		PTHR33053:SF3 (PANTHER); PTHR33053 (PANTHER)
TR23210|c0_g1_i1	PREDICTED: uncharacterized protein LOC103312002	9.32921	2.265e-05	0.000453045	724	0	-		PTHR19446:SF352 (PANTHER); PTHR19446 (PANTHER)
TR30773|c0_g1_i1	tubulin alpha-2 alpha-4 chain-like	9.21879	9.879e-08	7.209e-06	692	5	P:biological_process; C:cytoskeleton; C:protein complex; F:structural molecule activity; F:ion binding	-	IPR002452 (PRINTS); IPR018316 (SMART); IPR018316 (PFAM); IPR018316 (G3DSA:3.30.1330.GENE3D); PTHR11588:SF123 (PANTHER); IPR000217 (PANTHER); IPR008280 (SUPERFAMILY)
TR11435|c2_g1_i1	vesicle transport protein sec20	9.2081	1.22512e-06	6.69055e-05	798	0	-		no IPS match
TR40342|c3_g1_i5	d-aspartate oxidase	9.18644	3.755e-08	2.755e-06	1479	3	P:biological_process; F:ion binding; F:oxidoreductase activity; P:cellular amino acid metabolic process	EC:1.4.3.3	IPR006076 (PFAM); G3DSA:3.30.9.10 (GENE3D); IPR023209 (PANTHER); PTHR11530:SF12 (PANTHER); SSF54373 (SUPERFAMILY)
TR8547|c2_g1_i9	y+l amino acid transporter 2	9.14557	5.465e-08	3.005e-06	2257	3	P:transmembrane transport; F:transmembrane transporter activity; C:cellular_component	-	IPR002293 (PFAM); IPR002293 (PIRSF); PTHR11785:SF240 (PANTHER); IPR002293 (PANTHER); TRANSMEMBRANE (PHOBIUS); NON_CYTOPLASMIC_DOMAIN (PHOBIUS); TRANSMEMBRANE (PHOBIUS); CYTOPLASMIC_DOMAIN (PHOBIUS); NON_CYTOPLASMIC_DOMAIN (PHOBIUS); TRANSMEMBRANE (PHOBIUS); NON_CYTOPLASMIC_DOMAIN (PHOBIUS); TRANSMEMBRANE (PHOBIUS); TRANSMEMBRANE (PHOBIUS); CYTOPLASMIC_DOMAIN (PHOBIUS); TRANSMEMBRANE (PHOBIUS); NO…
TR4018|c6_g1_i6	tetratricopeptide repeat protein 30a isoform x2	9.13031	6.1067e-07	3.60434e-05	576	0	-		Coil (COILS); PTHR20931 (PANTHER)
TR20400|c0_g1_i1	uncharacterized f-box lrr-repeat isoform x2	9.10286	6.27806e-05	0.00194642	252	2	F:nucleic acid binding; F:nucleotide binding		IPR006553 (SMART); IPR032675 (G3DSA:3.80.10.GENE3D); SSF52047 (SUPERFAMILY)
TR25447|c0_g1_i1	PREDICTED: uncharacterized protein LOC103579447	9.03364	5.85016e-06	0.000147437	344	0	-		Coil (COILS)
TR48683|c0_g1_i1	odorant receptor or1-like	9.00754	7.25015e-06	0.000311477	250	0	-		CYTOPLASMIC_DOMAIN (PHOBIUS); NON_CYTOPLASMIC_DOMAIN (PHOBIUS); TRANSMEMBRANE (PHOBIUS); TMhelix (TMHMM)
TR32736|c2_g1_i8	gamma-tubulin complex component 4	8.99342	1.072e-07	6.92e-06	1443	2	C:cytoskeleton; P:cytoskeleton organization; C:microtubule organizing center	-	IPR007259 (PFAM); CYTOPLASMIC_DOMAIN (PHOBIUS); TRANSMEMBRANE (PHOBIUS); NON_CYTOPLASMIC_DOMAIN (PHOBIUS); TMhelix (TMHMM)
TR39478|c0_g2_i1	lateral signaling target protein 2 homolog isoform x1	8.91679	2.105e-07	1.358e-05	1066	0	-		PTHR22835:SF41 (PANTHER); PTHR22835 (PANTHER); NON_CYTOPLASMIC_DOMAIN (PHOBIUS); TRANSMEMBRANE (PHOBIUS); CYTOPLASMIC_DOMAIN (PHOBIUS); TMhelix (TMHMM)
TR41866|c0_g1_i13	PREDICTED: uncharacterized protein LOC105264479 isoform X3	8.85202	3.1629e-06	8.68139e-05	1425	0	-		IPR024810 (SMART); IPR024810 (PFAM); PTHR10656:SF32 (PANTHER); PTHR10656 (PANTHER)
TR13446|c0_g1_i7	calpain-a-like isoform x10	8.7166	5.665e-07	3.29e-05	498	3	P:biological_process; C:intracellular; F:peptidase activity	-	IPR022684 (PRINTS); IPR001300 (SMART); IPR001300 (PFAM); PTHR10183:SF310 (PANTHER); PTHR10183 (PANTHER); IPR001300 (PROSITE_PROFILES); SSF54001 (SUPERFAMILY)
TR20177|c0_g1_i9	nuclear envelope integral membrane protein 1	8.69391	7.2566e-06	0.000311833	1726	0	-		IPR019358 (PFAM); IPR019358 (PANTHER); PTHR13598:SF1 (PANTHER); TRANSMEMBRANE (PHOBIUS); TRANSMEMBRANE (PHOBIUS); SIGNAL_PEPTIDE_C_REGION (PHOBIUS); SIGNAL_PEPTIDE_N_REGION (PHOBIUS); NON_CYTOPLASMIC_DOMAIN (PHOBIUS); CYTOPLASMIC_DOMAIN (PHOBIUS); SIGNAL_PEPTIDE (PHOBIUS); TRANSMEMBRANE (PHOBIUS); CYTOPLASMIC_DOMAIN (PHOBIUS); SIGNAL_PEPTIDE_H_REGION (PHOBIUS); NON_CYTOPLASMIC_DOMAIN (PHOBIUS); T…
TR29004|c0_g2_i1	homeobox protein invected-like	8.66038	7.26145e-06	0.000178399	717	1	F:DNA binding		SignalP-TM (SIGNALP_GRAM_POSITIVE)
TR53735|c2_g1_i2	activating signal cointegrator 1 complex subunit 1-like	8.53773	1.5425e-06	7.83467e-05	427	0	-		no IPS match
TR736|c1_g1_i1	guanylate cyclase 32e	8.49408	1.1288e-05	0.000256634	417	0		-1
TR9110|c3_g2_i1	t-cell activation mitochondrial isoform x2	8.42156	2.63e-06	0.000103365	858	0	-		IPR027989 (PFAM); IPR027986 (PANTHER); PTHR31596:SF1 (PANTHER)
TR25347|c0_g1_i2	PREDICTED: uncharacterized protein LOC105282650 isoform X3	8.38159	2.795e-06	0.000126363	662	0	-		NON_CYTOPLASMIC_DOMAIN (PHOBIUS); SIGNAL_PEPTIDE_C_REGION (PHOBIUS); SIGNAL_PEPTIDE (PHOBIUS); SIGNAL_PEPTIDE_H_REGION (PHOBIUS); SIGNAL_PEPTIDE_N_REGION (PHOBIUS); SignalP-noTM (SIGNALP_EUK)
TR7457|c0_g1_i1	odorant receptor 13a-like isoform x1	8.3685	7.5215e-06	0.000321566	531	4	P:neurological system process; F:molecular_function; F:signal transducer activity; C:cellular_component; P:signal transduction	-	IPR004117 (PFAM); CYTOPLASMIC_DOMAIN (PHOBIUS); CYTOPLASMIC_DOMAIN (PHOBIUS); TRANSMEMBRANE (PHOBIUS); NON_CYTOPLASMIC_DOMAIN (PHOBIUS); TRANSMEMBRANE (PHOBIUS); TRANSMEMBRANE (PHOBIUS); NON_CYTOPLASMIC_DOMAIN (PHOBIUS); TMhelix (TMHMM); TMhelix (TMHMM); TMhelix (TMHMM)
TR460|c1_g1_i2	PREDICTED: uncharacterized protein LOC106637599	8.29273	6.28366e-05	0.00194897	833	0	-		IPR028036 (PFAM); PD395400 (PRODOM)
TR53758|c2_g1_i4	centrosomal protein of 135 kda isoform x2	8.1679	1.302e-05	0.000504402	3020	0	-		Coil (COILS); Coil (COILS); Coil (COILS); Coil (COILS); Coil (COILS); Coil (COILS); Coil (COILS); Coil (COILS); Coil (COILS); Coil (COILS); Coil (COILS); PTHR23159:SF13 (PANTHER); PTHR23159 (PANTHER); SSF57997 (SUPERFAMILY); SSF90257 (SUPERFAMILY)
TR32706|c3_g1_i3	e3 ubiquitin-protein ligase trim9 isoform x2	8.12294	1.3845e-05	0.000524488	611	0	-		NON_CYTOPLASMIC_DOMAIN (PHOBIUS); TRANSMEMBRANE (PHOBIUS); CYTOPLASMIC_DOMAIN (PHOBIUS); TMhelix (TMHMM)
TR29896|c1_g2_i1	1-phosphatidylinositol -bisphosphate phosphodiesterase classes i and ii isoform x2	8.11614	8.27169e-05	0.00132763	349	4	P:signal transduction; F:molecular_function; F:signal transducer activity; P:catabolic process; P:lipid metabolic process	EC:3.1.4.11	IPR000909 (SMART); IPR017946 (G3DSA:3.20.20.GENE3D); IPR000909 (PFAM); IPR001192 (PANTHER); IPR028407 (PTHR10336:PANTHER); IPR000909 (PROSITE_PROFILES); IPR017946 (SUPERFAMILY)
TR16867|c0_g1_i3	protein abnormal spindle	8.04417	8.30094e-05	0.00250456	1936	1	P:spindle organization		SignalP-noTM (SIGNALP_EUK)
TR33246|c12_g1_i3	endophilin-a isoform x1	7.98448	5.05e-12	5.15e-10	1444	3	F:molecular_function; C:cytoplasm; P:vesicle-mediated transport	-	IPR001452 (PRINTS); IPR013315 (PRINTS); IPR004148 (SMART); IPR001452 (SMART); IPR027267 (G3DSA:1.20.1270.GENE3D); IPR004148 (PFAM); G3DSA:2.30.30.40 (GENE3D); IPR001452 (PFAM); PTHR10663 (PANTHER); IPR028501 (PTHR10663:PANTHER); IPR004148 (PROSITE_PROFILES); IPR001452 (PROSITE_PROFILES); SSF103657 (SUPERFAMILY); IPR001452 (SUPERFAMILY)
TR35098|c0_g1_i1	broad-complex core protein isoforms 1 2 3 4 5-like isoform x5	7.97938	3.211e-05	0.00110267	750	0	-		no IPS match
TR1486|c4_g4_i8	beta- -galactosyltransferase 1-like isoform x1	7.955	3.369e-05	0.000775199	1492	5	C:cellular_component; P:cellular protein modification process; P:biosynthetic process; P:carbohydrate metabolic process; F:transferase activity, transferring glycosyl groups	EC:2.4.1	IPR002659 (PFAM); SIGNAL_PEPTIDE (PHOBIUS); SIGNAL_PEPTIDE_C_REGION (PHOBIUS); TRANSMEMBRANE (PHOBIUS); NON_CYTOPLASMIC_DOMAIN (PHOBIUS); SIGNAL_PEPTIDE_H_REGION (PHOBIUS); SIGNAL_PEPTIDE_N_REGION (PHOBIUS); CYTOPLASMIC_DOMAIN (PHOBIUS); SignalP-noTM (SIGNALP_EUK); TMhelix (TMHMM); TMhelix (TMHMM)
TR15866|c0_g1_i1	atp-dependent dna helicase pif1-like	7.79989	3.20502e-10	2.20007e-08	977	6	P:homeostatic process; P:chromosome organization; P:DNA metabolic process; P:response to stress; F:helicase activity; C:chromosome	-	IPR010285 (PFAM); IPR027417 (G3DSA:3.40.50.GENE3D); PTHR10492 (PANTHER); IPR027417 (SUPERFAMILY); IPR027417 (SUPERFAMILY)
TR576|c0_g1_i1	adenylate kinase 9-like protein	7.7013	0.000201262	0.0028522	355	0	-		no IPS match
TR45157|c3_g1_i1	low quality protein: at-rich interactive domain-containing protein 4b	7.57849	5.65126e-15	1.14595e-12	2934	1	F:DNA binding		Coil (COILS); Coil (COILS); Coil (COILS)
TR33062|c0_g1_i1	PREDICTED: uncharacterized protein LOC105198370	7.50729	0.000191379	0.00410989	461	0	-		no IPS match
TR47086|c0_g1_i3	tbc1 domain family member 13	7.50312	0.000193507	0.00486773	804	0	-		IPR000195 (PFAM); PTHR22957:SF27 (PANTHER); PTHR22957 (PANTHER); IPR000195 (PROSITE_PROFILES); IPR000195 (SUPERFAMILY)
TR51321|c0_g1_i1	PREDICTED: uncharacterized protein LOC105272833	7.45161	7.66e-14	1.44e-11	1109	6	P:homeostatic process; P:chromosome organization; P:DNA metabolic process; P:response to stress; F:helicase activity; C:chromosome	-	IPR010285 (PFAM); IPR027417 (G3DSA:3.40.50.GENE3D); PTHR10492 (PANTHER); IPR027417 (SUPERFAMILY)
TR37897|c2_g1_i4	transmembrane 9 superfamily member 2 isoform x1	7.42603	3.28225e-12	5.24425e-10	2214	1	C:cellular_component	-	IPR004240 (PFAM); PTHR10766:SF36 (PANTHER); IPR004240 (PANTHER); NON_CYTOPLASMIC_DOMAIN (PHOBIUS); TRANSMEMBRANE (PHOBIUS); CYTOPLASMIC_DOMAIN (PHOBIUS); CYTOPLASMIC_DOMAIN (PHOBIUS); NON_CYTOPLASMIC_DOMAIN (PHOBIUS); TRANSMEMBRANE (PHOBIUS); NON_CYTOPLASMIC_DOMAIN (PHOBIUS); TRANSMEMBRANE (PHOBIUS); TRANSMEMBRANE (PHOBIUS); CYTOPLASMIC_DOMAIN (PHOBIUS); TRANSMEMBRANE (PHOBIUS); CYTOPLASMIC_DOMAI…
TR12504|c0_g1_i1	vesicular glutamate transporter 1-like	7.38405	0.000304392	0.00576759	534	0	-		G3DSA:1.20.1250.20 (GENE3D); PTHR11662:SF263 (PANTHER); PTHR11662 (PANTHER); NON_CYTOPLASMIC_DOMAIN (PHOBIUS); CYTOPLASMIC_DOMAIN (PHOBIUS); TRANSMEMBRANE (PHOBIUS); CYTOPLASMIC_DOMAIN (PHOBIUS); TRANSMEMBRANE (PHOBIUS); TRANSMEMBRANE (PHOBIUS); NON_CYTOPLASMIC_DOMAIN (PHOBIUS); IPR020846 (PROSITE_PROFILES); IPR020846 (SUPERFAMILY); TMhelix (TMHMM); TMhelix (TMHMM); TMhelix (TMHMM)
TR55141|c2_g2_i10	inositol hexakisphosphate and diphosphoinositol-pentakisphosphate kinase isoform x6	7.38327	8.40085e-14	1.69034e-11	1904	0	-		no IPS match
TR1545|c0_g1_i1	gag-like protein	7.10997	8.05e-10	8.85e-08	1301	1	F:ion binding; F:molecular_function	-	Coil (COILS); IPR001878 (G3DSA:4.10.60.GENE3D); IPR001878 (SUPERFAMILY)
TR52882|c4_g2_i3	rho guanine nucleotide exchange factor 7 isoform x1	6.82592	7.40001e-12	1.125e-09	2947	0	-		IPR006553 (SMART); IPR032675 (G3DSA:3.80.10.GENE3D); IPR032675 (G3DSA:3.80.10.GENE3D); PTHR24006 (PANTHER); SSF52047 (SUPERFAMILY)
TR8939|c0_g1_i1	PREDICTED: uncharacterized protein LOC107040743	6.50846	1.24e-08	7.02e-07	367	0	-		PTHR10492 (PANTHER)
TR1453|c1_g2_i1	PREDICTED: uncharacterized protein LOC106657783	6.30986	2.41e-08	1.8635e-06	309	0	-		no IPS match
TR28916|c0_g1_i1	liprin-beta-2 isoform x3	6.23262	1.59502e-07	1.11002e-05	285	0	-		SignalP-TM (SIGNALP_GRAM_POSITIVE)
TR31789|c1_g1_i3	metal transporter cnnm4 isoform x2	6.20471	5.903e-11	7.915e-09	1699	0	-		IPR002550 (PFAM); PTHR12064:SF34 (PANTHER); PTHR12064 (PANTHER); SIGNAL_PEPTIDE_N_REGION (PHOBIUS); CYTOPLASMIC_DOMAIN (PHOBIUS); SIGNAL_PEPTIDE_C_REGION (PHOBIUS); SIGNAL_PEPTIDE (PHOBIUS); NON_CYTOPLASMIC_DOMAIN (PHOBIUS); TRANSMEMBRANE (PHOBIUS); TRANSMEMBRANE (PHOBIUS); CYTOPLASMIC_DOMAIN (PHOBIUS); SIGNAL_PEPTIDE_H_REGION (PHOBIUS); NON_CYTOPLASMIC_DOMAIN (PHOBIUS); TRANSMEMBRANE (PHOBIUS); …
TR53758|c1_g1_i1	PREDICTED: uncharacterized protein LOC107042544	6.03089	6.15181e-12	9.55418e-10	1499	0	-		Coil (COILS); Coil (COILS); Coil (COILS); Coil (COILS)
TR1488|c10_g3_i2	fasciclin-1 isoform x2	5.88423	1.03001e-10	7.80022e-09	2969	0	-		IPR000782 (SMART); IPR000782 (PFAM); IPR000782 (G3DSA:2.30.180.GENE3D); PTHR10900 (PANTHER); PTHR10900:SF80 (PANTHER); SIGNAL_PEPTIDE_C_REGION (PHOBIUS); SIGNAL_PEPTIDE (PHOBIUS); NON_CYTOPLASMIC_DOMAIN (PHOBIUS); SIGNAL_PEPTIDE_N_REGION (PHOBIUS); SIGNAL_PEPTIDE_H_REGION (PHOBIUS); IPR000782 (PROSITE_PROFILES); IPR000782 (PROSITE_PROFILES); IPR000782 (PROSITE_PROFILES); IPR000782 (PROSITE_PROFIL…
TR3996|c9_g1_i3	nuclear factor 1 x-type isoform x2	5.74112	1.125e-05	0.000253617	1176	5	P:biosynthetic process; P:DNA metabolic process; P:cellular nitrogen compound metabolic process; F:nucleic acid binding transcription factor activity; C:nucleus; C:protein complex; C:intracellular	-	Coil (COILS); IPR000647 (PFAM); PTHR11492:SF8 (PANTHER); IPR000647 (PANTHER); IPR000647 (PANTHER); PTHR11492:SF8 (PANTHER)
TR53818|c13_g2_i1	lachesin-like isoform x5	5.6665	1.58056e-09	1.64568e-07	706	1	F:molecular_function	-	IPR013783 (G3DSA:2.60.40.GENE3D); NON_CYTOPLASMIC_DOMAIN (PHOBIUS); CYTOPLASMIC_DOMAIN (PHOBIUS); TRANSMEMBRANE (PHOBIUS); IPR007110 (SUPERFAMILY)
TR1528|c4_g3_i2	protein unc-79 homolog isoform x4	5.6564	2.28e-11	2.575e-09	1178	1	F:molecular_function	-	IPR024855 (PANTHER); PTHR21696:SF2 (PANTHER)
TR13679|c5_g1_i1	hypothetical protein X777_08139, partial	5.64803	9.60013e-07	5.4781e-05	1022	0	-		PTHR33053:SF3 (PANTHER); PTHR33053 (PANTHER)
TR42313|c5_g2_i2	zinc finger ccch domain-containing protein 13 isoform x3	5.60835	1.80905e-10	2.2266e-08	2241	0	-		no IPS match
TR9105|c13_g1_i1	Non Assigned	5.58783	3.69e-05	0.00125394	672	0		1
TR28724|c13_g1_i7	coiled-coil domain-containing protein agap005037-like isoform x4	5.52787	1.19063e-07	8.605e-06	408	0	-		NON_CYTOPLASMIC_DOMAIN (PHOBIUS); TRANSMEMBRANE (PHOBIUS); CYTOPLASMIC_DOMAIN (PHOBIUS); TMhelix (TMHMM)
TR31589|c1_g1_i1	microtubule-associated protein futsch-like isoform x7	5.41934	1.035e-07	7.55e-06	5024	2	P:signal transduction; F:molecular_function	-	Coil (COILS); IPR000488 (SMART); IPR000906 (SMART); IPR000906 (PFAM); IPR000488 (PFAM); IPR011029 (G3DSA:1.10.533.GENE3D); PTHR24123 (PANTHER); IPR000906 (PROSITE_PROFILES); IPR000488 (PROSITE_PROFILES); IPR011029 (SUPERFAMILY)
TR45132|c0_g2_i3	prostaglandin reductase 1-like	5.4081	3.23001e-09	3.19001e-07	464	3	P:biological_process; F:oxidoreductase activity; F:ion binding	-	IPR011032 (G3DSA:3.90.180.GENE3D); PF16884 (PFAM); PTHR11695:SF528 (PANTHER); IPR002085 (PANTHER); IPR011032 (SUPERFAMILY)
TR40405|c0_g3_i1	hypothetical protein RF55_13410	5.34051	1.85e-07	7.15009e-06	2689	1	F:ion binding; F:molecular_function	-	IPR001878 (SMART); IPR001878 (PFAM); IPR001878 (G3DSA:4.10.60.GENE3D); IPR001878 (PROSITE_PROFILES); IPR001878 (SUPERFAMILY)
TR24715|c11_g1_i6	mothers against decapentaplegic homolog 4 isoform x3	5.23597	2.1483e-07	1.4483e-05	557	0	-		no IPS match
TR43738|c0_g1_i1	zinc finger protein 83-like isoform x1	5.19534	3.43e-05	0.00116356	380	0	-		no IPS match
TR39089|c1_g1_i1	nuclear valosin-containing	5.15606	1.265e-05	0.000281767	5220	1	F:molecular_function	-	IPR005135 (G3DSA:3.60.10.GENE3D); IPR005135 (PFAM); IPR000477 (PFAM); PTHR19446 (PANTHER); TRANSMEMBRANE (PHOBIUS); NON_CYTOPLASMIC_DOMAIN (PHOBIUS); CYTOPLASMIC_DOMAIN (PHOBIUS); IPR000477 (PROSITE_PROFILES); IPR005135 (SUPERFAMILY); SSF56672 (SUPERFAMILY)
TR16825|c9_g1_i1	semaphorin-2a isoform x3	5.10764	1.89166e-09	1.94191e-07	1039	0	-		no IPS match
TR6201|c3_g11_i3	PREDICTED: uncharacterized protein LOC107040391	5.07424	3.145e-06	0.000154467	939	0	-		no IPS match
TR31648|c2_g4_i8	charged multivesicular body protein 1b	4.98365	4.6902e-07	2.95018e-05	2399	1	P:vacuolar transport	-	Coil (COILS); IPR005024 (PFAM); PTHR10476:SF18 (PANTHER); PTHR10476 (PANTHER)
TR8254|c12_g1_i1	reticulon-1-a isoform x5	4.98282	6.7e-06	0.00029623	1908	0	-		no IPS match
TR29789|c0_g3_i1	at-rich interactive domain-containing protein 5b-like isoform x2	4.9486	1.101e-07	7.58e-06	539	4	P:cellular nitrogen compound metabolic process; P:biosynthetic process; C:nucleus; F:DNA binding	-	PTHR13964 (PANTHER); IPR030408 (PTHR13964:PANTHER)
TR15534|c0_g1_i2	erad-associated e3 ubiquitin-protein ligase hrd1b-like	4.81815	7.035e-07	4.004e-05	603	0	-		no IPS match
TR5207|c0_g1_i1	neo-calmodulin-like isoform x4	4.7677	4.025e-07	2.575e-05	1082	1	F:ion binding	-	IPR002048 (SMART); IPR011992 (G3DSA:1.10.238.GENE3D); IPR011992 (G3DSA:1.10.238.GENE3D); IPR002048 (PFAM); PTHR23050 (PANTHER); IPR018247 (PROSITE_PATTERNS); IPR018247 (PROSITE_PATTERNS); IPR018247 (PROSITE_PATTERNS); IPR018247 (PROSITE_PATTERNS); IPR002048 (PROSITE_PROFILES); IPR002048 (PROSITE_PROFILES); IPR002048 (PROSITE_PROFILES); IPR002048 (PROSITE_PROFILES); IPR011992 (SUPERFAMILY)
TR5664|c1_g1_i1	rna polymerase-associated protein rtf1	4.75014	1.8511e-06	9.68635e-05	1243	0	-		Coil (COILS)
TR19484|c1_g1_i3	protein alpha isoform-like isoform x1	4.65796	1.925e-06	0.000100248	674	0	-		no IPS match
TR3124|c0_g1_i1	coiled-coil-helix-coiled-coil-helix domain-containing protein 7	4.60786	2.95502e-06	0.000147548	409	0	-		IPR009069 (G3DSA:1.10.810.GENE3D); PTHR21588 (PANTHER); IPR009069 (SUPERFAMILY)
TR33206|c1_g1_i1	kda protein in nof-fb transposable element	4.5579	5.35073e-07	3.26558e-05	2376	0	-		no IPS match
TR37860|c11_g1_i5	upf0430 protein cg31712 isoform x1	4.47764	1.225e-05	0.000484713	1440	0	-		Coil (COILS); Coil (COILS); Coil (COILS); IPR033371 (PFAM); IPR033371 (PANTHER); SignalP-TM (SIGNALP_GRAM_POSITIVE)
TR10701|c0_g1_i1	general odorant-binding protein 83a-like	4.40032	9.15e-06	0.000378068	528	1	F:odorant binding		no IPS match
TR39701|c9_g2_i1	calcium calmodulin-dependent protein kinase type 1-like	4.39902	2.07e-08	1.7145e-06	499	0	-		no IPS match
TR53205|c0_g1_i2	zinc finger bed domain-containing protein ricesleeper 2-like	4.37176	2.18e-07	8.765e-06	1679	1	F:molecular_function	-	IPR008906 (PFAM); PTHR23272 (PANTHER); IPR012337 (SUPERFAMILY)
TR53868|c5_g2_i1	caax prenyl protease 1 homolog	4.36312	2.37553e-06	0.000121279	1282	3	C:cellular_component; F:peptidase activity; P:protein maturation	EC:3.4.24	IPR032456 (PFAM); IPR001915 (PFAM); G3DSA:3.30.2010.10 (GENE3D); IPR027057 (PTHR10120:PANTHER); PTHR10120 (PANTHER); CYTOPLASMIC_DOMAIN (PHOBIUS); TRANSMEMBRANE (PHOBIUS); TRANSMEMBRANE (PHOBIUS); TRANSMEMBRANE (PHOBIUS); CYTOPLASMIC_DOMAIN (PHOBIUS); NON_CYTOPLASMIC_DOMAIN (PHOBIUS); NON_CYTOPLASMIC_DOMAIN (PHOBIUS); TMhelix (TMHMM); TMhelix (TMHMM); TMhelix (TMHMM); TMhelix (TMHMM); TMhelix (TM…
TR32703|c20_g1_i1	serine threonine-protein kinase mig-15	4.36111	1.82e-05	0.000686083	271	2	F:kinase activity; P:biological_process	-	no IPS match
TR34592|c1_g2_i2	low quality protein: death-associated protein kinase 3-like	4.31724	2.79522e-05	0.00100625	1144	3	F:ion binding; F:kinase activity; P:cellular protein modification process	-	IPR000719 (PFAM); G3DSA:3.30.200.20 (GENE3D); PTHR24347:SF118 (PANTHER); IPR020636 (PANTHER); IPR017441 (PROSITE_PATTERNS); IPR000719 (PROSITE_PROFILES); IPR011009 (SUPERFAMILY)
TR40371|c5_g4_i1	f-box lrr-repeat protein 20 isoform x2	4.29318	2.87001e-05	0.00101615	345	0		2
TR1798|c0_g1_i2	equilibrative nucleoside transporter 1	4.1852	0.000117255	0.00339369	655	3	F:transmembrane transporter activity; C:cellular_component; P:transport	-	IPR002259 (PFAM); PTHR10332:SF10 (PANTHER); IPR002259 (PANTHER); TRANSMEMBRANE (PHOBIUS); TRANSMEMBRANE (PHOBIUS); TRANSMEMBRANE (PHOBIUS); CYTOPLASMIC_DOMAIN (PHOBIUS); NON_CYTOPLASMIC_DOMAIN (PHOBIUS); TRANSMEMBRANE (PHOBIUS); CYTOPLASMIC_DOMAIN (PHOBIUS); NON_CYTOPLASMIC_DOMAIN (PHOBIUS); NON_CYTOPLASMIC_DOMAIN (PHOBIUS); TRANSMEMBRANE (PHOBIUS); CYTOPLASMIC_DOMAIN (PHOBIUS); IPR020846 (SUPERF…
TR21954|c1_g1_i2	furin-like protease isoforms 1 1-x 2	4.15973	3.97e-05	0.0013275	381	1	F:peptidase activity	-	IPR008979 (G3DSA:2.60.120.GENE3D); IPR008979 (SUPERFAMILY)
TR48200|c0_g1_i1	rna-directed dna polymerase from mobile element jockey-like	4.13912	8.9286e-06	0.000213348	997	0	-		IPR005135 (G3DSA:3.60.10.GENE3D); IPR005135 (PFAM); IPR005135 (SUPERFAMILY)
TR40388|c3_g1_i2	copia protein	4.13027	1.6925e-07	7.59e-06	2079	0	-		IPR013103 (PFAM); PTHR11439 (PANTHER); SSF56672 (SUPERFAMILY)
TR2742|c0_g1_i2	odorant receptor 4-like	4.12964	7.3849e-05	0.002259	745	4	C:cellular_component; P:neurological system process; F:signal transducer activity; F:molecular_function; P:signal transduction	-	IPR004117 (PFAM); IPR004117 (PANTHER); TRANSMEMBRANE (PHOBIUS); CYTOPLASMIC_DOMAIN (PHOBIUS); NON_CYTOPLASMIC_DOMAIN (PHOBIUS); CYTOPLASMIC_DOMAIN (PHOBIUS); TRANSMEMBRANE (PHOBIUS); TRANSMEMBRANE (PHOBIUS); NON_CYTOPLASMIC_DOMAIN (PHOBIUS); TMhelix (TMHMM); TMhelix (TMHMM); TMhelix (TMHMM)
TR28349|c1_g1_i2	zinc finger cchc-type and rna-binding motif-containing protein 1-like	4.10865	3.3325e-06	0.000101076	522	0	-		no IPS match
TR29600|c0_g1_i1	PREDICTED: uncharacterized protein LOC107048687	4.10608	8.965e-06	0.000266406	828	0	-		NON_CYTOPLASMIC_DOMAIN (PHOBIUS); TRANSMEMBRANE (PHOBIUS); CYTOPLASMIC_DOMAIN (PHOBIUS); TMhelix (TMHMM)
TR28721|c1_g1_i3	vesicular glutamate transporter 2-like	4.09575	0.000114182	0.00169652	2278	2	C:cellular_component; P:transmembrane transport	-	G3DSA:1.20.1250.20 (GENE3D); IPR011701 (PFAM); G3DSA:1.20.1250.20 (GENE3D); PTHR11662:SF226 (PANTHER); PTHR11662 (PANTHER); NON_CYTOPLASMIC_DOMAIN (PHOBIUS); TRANSMEMBRANE (PHOBIUS); TRANSMEMBRANE (PHOBIUS); TRANSMEMBRANE (PHOBIUS); CYTOPLASMIC_DOMAIN (PHOBIUS); TRANSMEMBRANE (PHOBIUS); TRANSMEMBRANE (PHOBIUS); NON_CYTOPLASMIC_DOMAIN (PHOBIUS); CYTOPLASMIC_DOMAIN (PHOBIUS); CYTOPLASMIC_DOMAIN (PH…
TR27579|c1_g1_i2	ubinuclein-2 isoform x2	4.05823	4.98115e-06	0.00013004	1116	0	-		IPR026947 (PFAM); IPR032467 (PTHR21669:PANTHER); PTHR21669 (PANTHER)
TR21720|c0_g1_i1	toll-like receptor 13	4.02242	2.62537e-06	7.44889e-05	1607	1	F:molecular_function	-	IPR003591 (SMART); SM00365 (SMART); IPR032675 (G3DSA:3.80.10.GENE3D); IPR032675 (G3DSA:3.80.10.GENE3D); IPR032675 (G3DSA:3.80.10.GENE3D); IPR001611 (PFAM); PTHR24373:SF147 (PANTHER); PTHR24373 (PANTHER); SIGNAL_PEPTIDE (PHOBIUS); SIGNAL_PEPTIDE_C_REGION (PHOBIUS); SIGNAL_PEPTIDE_N_REGION (PHOBIUS); NON_CYTOPLASMIC_DOMAIN (PHOBIUS); SIGNAL_PEPTIDE_H_REGION (PHOBIUS); IPR001611 (PROSITE_PROFILES); …
TR8558|c0_g1_i2	PREDICTED: uncharacterized protein LOC105571072	3.97539	1.20501e-05	0.000478195	7786	2	F:molecular_function; P:DNA metabolic process; F:peptidase activity; P:biological_process	EC:3.4.23	IPR012337 (G3DSA:3.30.420.GENE3D); IPR008042 (PFAM); IPR008737 (PFAM); IPR012337 (G3DSA:3.30.420.GENE3D); PTHR22955 (PANTHER); PTHR22955:SF3 (PANTHER); PTHR22955 (PANTHER); PTHR22955:SF3 (PANTHER); NON_CYTOPLASMIC_DOMAIN (PHOBIUS); SIGNAL_PEPTIDE_H_REGION (PHOBIUS); SIGNAL_PEPTIDE (PHOBIUS); SIGNAL_PEPTIDE_N_REGION (PHOBIUS); SIGNAL_PEPTIDE_C_REGION (PHOBIUS); IPR001584 (PROSITE_PROFILES); IPR001…
TR21232|c1_g1_i1	carboxypeptidase n subunit 2-like	3.93196	2.15e-06	7.12012e-05	818	1	F:molecular_function	-	IPR003591 (SMART); IPR032675 (G3DSA:3.80.10.GENE3D); IPR032675 (G3DSA:3.80.10.GENE3D); IPR001611 (PFAM); IPR026906 (PFAM); IPR001611 (PFAM); PTHR24373 (PANTHER); PTHR24373:SF100 (PANTHER); PTHR24373:SF100 (PANTHER); PTHR24373 (PANTHER); IPR001611 (PROSITE_PROFILES); IPR001611 (PROSITE_PROFILES); IPR001611 (PROSITE_PROFILES); IPR001611 (PROSITE_PROFILES); IPR001611 (PROSITE_PROFILES); IPR001611 (P…
TR3961|c18_g1_i1	phytanoyl- dioxygenase domain-containing protein 1 homolog	3.88156	0.000136502	0.00307604	362	0	-		G3DSA:2.60.120.620 (GENE3D); IPR008775 (PFAM); PTHR20883 (PANTHER); PTHR20883:SF15 (PANTHER); SSF51197 (SUPERFAMILY)
TR36999|c0_g1_i1	leupaxin isoform x3	3.8631	5.0825e-07	3.148e-05	2063	3	F:ion binding; P:cell adhesion; C:cytoskeleton	-	Coil (COILS); Coil (COILS); IPR001781 (SMART); IPR001781 (G3DSA:2.10.110.GENE3D); IPR001781 (PFAM); PTHR24216 (PANTHER); IPR001904 (PTHR24216:PANTHER); IPR001781 (PROSITE_PATTERNS); IPR001781 (PROSITE_PATTERNS); IPR001781 (PROSITE_PATTERNS); IPR001781 (PROSITE_PROFILES); IPR001781 (PROSITE_PROFILES); IPR001781 (PROSITE_PROFILES); SSF57716 (SUPERFAMILY); SSF57716 (SUPERFAMILY); SSF57716 (SUPERFAMI…
TR29834|c1_g2_i2	prkr-interacting protein 1 homolog	3.8341	1.02425e-06	5.77182e-05	1035	0	-		IPR009548 (PFAM); IPR009548 (PANTHER)
TR21823|c0_g1_i3	neurexin-4 isoform x1	3.80329	0.000136214	0.00386429	678	0	-		no IPS match
TR16865|c0_g2_i1	ww domain-containing adapter protein with coiled-coil isoform x1	3.78361	4.5815e-05	0.00149303	738	1	F:molecular_function	-	IPR001202 (SMART); IPR001202 (PFAM); G3DSA:2.20.70.10 (GENE3D); PTHR15911 (PANTHER); PTHR15911:SF6 (PANTHER); IPR001202 (PROSITE_PATTERNS); IPR001202 (PROSITE_PROFILES); IPR001202 (SUPERFAMILY)
TR52902|c20_g1_i1	proton-coupled amino acid transporter 2 isoform x2	3.7541	7.10442e-06	0.000311718	1047	0	-		no IPS match
TR37907|c8_g1_i10	glutamate receptor kainate 2 isoform x3	3.74483	1.5504e-05	0.000330422	3166	6	P:transport; C:cellular_component; F:signal transducer activity; F:transmembrane transporter activity; P:signal transduction; P:cell-cell signaling	-	IPR001508 (PRINTS); IPR019594 (SMART); IPR001320 (SMART); G3DSA:3.40.50.2300 (GENE3D); IPR019594 (PFAM); G3DSA:3.40.190.10 (GENE3D); IPR001320 (PFAM); G3DSA:1.10.287.70 (GENE3D); IPR001828 (PFAM); G3DSA:3.40.50.2300 (GENE3D); PTHR18966 (PANTHER); PTHR18966:SF185 (PANTHER); CYTOPLASMIC_DOMAIN (PHOBIUS); TRANSMEMBRANE (PHOBIUS); NON_CYTOPLASMIC_DOMAIN (PHOBIUS); TRANSMEMBRANE (PHOBIUS); CYTOPLASMIC…
TR4372|c2_g1_i2	golgin subfamily a member 4-like	3.68545	6.255e-07	3.565e-05	3361	1	F:molecular_function	-	IPR003598 (SMART); IPR003599 (SMART); IPR013783 (G3DSA:2.60.40.GENE3D); IPR013098 (PFAM); IPR013783 (G3DSA:2.60.40.GENE3D); IPR013783 (G3DSA:2.60.40.GENE3D); IPR013783 (G3DSA:2.60.40.GENE3D); IPR013783 (G3DSA:2.60.40.GENE3D); IPR013783 (G3DSA:2.60.40.GENE3D); PTHR10489:SF642 (PANTHER); PTHR10489 (PANTHER); PTHR10489 (PANTHER); PTHR10489:SF642 (PANTHER); IPR007110 (PROSITE_PROFILES); IPR007110 (PR…
TR4388|c16_g2_i1	whirlin isoform x4	3.66671	2.947e-06	8.83806e-05	752	1	F:molecular_function	-	IPR001478 (SMART); IPR001478 (PFAM); IPR001478 (G3DSA:2.30.42.GENE3D); PTHR23116 (PANTHER); IPR001478 (PROSITE_PROFILES); IPR001478 (SUPERFAMILY)
TR52907|c5_g1_i1	c-myc promoter-binding protein isoform x1	3.64872	1.23678e-05	0.000488343	1432	0	-		PTHR12296:SF3 (PANTHER); PTHR12296 (PANTHER); SignalP-noTM (SIGNALP_GRAM_NEGATIVE); SignalP-noTM (SIGNALP_EUK); SignalP-TM (SIGNALP_GRAM_POSITIVE); TMhelix (TMHMM)
TR36087|c0_g2_i1	dynamin-1-like protein	3.64834	8.162e-06	0.000346161	566	3	F:ion binding; P:biological_process; P:mitochondrion organization; F:GTPase activity	-	NON_CYTOPLASMIC_DOMAIN (PHOBIUS); TRANSMEMBRANE (PHOBIUS); CYTOPLASMIC_DOMAIN (PHOBIUS); TMhelix (TMHMM)
TR13038|c0_g3_i4	excitatory amino acid transporter isoform x1	3.63657	5.61525e-06	0.000253586	2444	3	C:cellular_component; P:transport; F:transmembrane transporter activity	-	IPR001991 (PRINTS); IPR001991 (G3DSA:1.10.3860.GENE3D); IPR001991 (PFAM); PTHR11958:SF63 (PANTHER); IPR001991 (PANTHER); IPR018107 (PROSITE_PATTERNS); TRANSMEMBRANE (PHOBIUS); NON_CYTOPLASMIC_DOMAIN (PHOBIUS); NON_CYTOPLASMIC_DOMAIN (PHOBIUS); CYTOPLASMIC_DOMAIN (PHOBIUS); NON_CYTOPLASMIC_DOMAIN (PHOBIUS); CYTOPLASMIC_DOMAIN (PHOBIUS); TRANSMEMBRANE (PHOBIUS); NON_CYTOPLASMIC_DOMAIN (PHOBIUS); TR…
TR40050|c1_g2_i3	PREDICTED: uncharacterized protein CG7065-like	3.62504	4.00036e-05	0.00133538	2129	0	-		Coil (COILS); NON_CYTOPLASMIC_DOMAIN (PHOBIUS); TRANSMEMBRANE (PHOBIUS); CYTOPLASMIC_DOMAIN (PHOBIUS); TMhelix (TMHMM)
TR38078|c1_g1_i1	PREDICTED: uncharacterized protein LOC100867780 isoform X1	3.59274	8.465e-07	4.425e-05	855	0	-		CYTOPLASMIC_DOMAIN (PHOBIUS); NON_CYTOPLASMIC_DOMAIN (PHOBIUS); TRANSMEMBRANE (PHOBIUS); TMhelix (TMHMM)
TR32840|c4_g1_i2	tnf receptor-associated factor family protein ddb_g0272098 isoform x2	3.58923	3.7387e-06	0.000179771	1429	0	-		TMhelix (TMHMM)
TR52641|c0_g1_i3	odorant receptor 13a-like	3.58361	0.000227528	0.00365619	376	0	-		TRANSMEMBRANE (PHOBIUS); CYTOPLASMIC_DOMAIN (PHOBIUS); NON_CYTOPLASMIC_DOMAIN (PHOBIUS)
TR4433|c0_g2_i2	cytochrome p450 4c1-like	3.57561	1.4795e-06	7.42588e-05	970	3	F:ion binding; P:biological_process; F:oxidoreductase activity; F:molecular_function	-	IPR001128 (PFAM); IPR001128 (G3DSA:1.10.630.GENE3D); PTHR24291:SF56 (PANTHER); PTHR24291 (PANTHER); TRANSMEMBRANE (PHOBIUS); NON_CYTOPLASMIC_DOMAIN (PHOBIUS); CYTOPLASMIC_DOMAIN (PHOBIUS); IPR001128 (SUPERFAMILY); TMhelix (TMHMM)
TR53771|c7_g1_i2	tyramine beta-hydroxylase	3.55618	4.26e-05	0.00138646	1137	2	P:biological_process; F:oxidoreductase activity	EC:1.14.17	IPR024548 (PFAM); IPR014784 (G3DSA:2.60.120.GENE3D); IPR028460 (PTHR10157:PANTHER); IPR000945 (PANTHER); SIGNAL_PEPTIDE_N_REGION (PHOBIUS); SIGNAL_PEPTIDE_C_REGION (PHOBIUS); NON_CYTOPLASMIC_DOMAIN (PHOBIUS); SIGNAL_PEPTIDE (PHOBIUS); SIGNAL_PEPTIDE_H_REGION (PHOBIUS); SignalP-noTM (SIGNALP_EUK); IPR008977 (SUPERFAMILY)
TR4423|c3_g2_i6	ephrin type-a receptor 4-a isoform x9	3.55409	5.79126e-05	0.00182513	785	0	-		CYTOPLASMIC_DOMAIN (PHOBIUS); CYTOPLASMIC_DOMAIN (PHOBIUS); TRANSMEMBRANE (PHOBIUS); TRANSMEMBRANE (PHOBIUS); NON_CYTOPLASMIC_DOMAIN (PHOBIUS); TMhelix (TMHMM); TMhelix (TMHMM)
TR8533|c1_g1_i1	blastopia polyprotein	3.5417	1.08e-05	0.000409502	1996	2	F:molecular_function; P:DNA metabolic process	-	Coil (COILS); IPR012337 (G3DSA:3.30.420.GENE3D); IPR001584 (PFAM); PTHR24559:SF174 (PANTHER); PTHR24559 (PANTHER); IPR001584 (PROSITE_PROFILES); SSF56672 (SUPERFAMILY); IPR012337 (SUPERFAMILY)
TR49014|c2_g2_i3	ribosomal protein s6 kinase beta-1-like	3.49909	1.1783e-05	0.00027402	1809	0	-		no IPS match
TR8123|c2_g2_i1	acetyl- cytosolic	3.47971	2.563e-06	8.21684e-05	1579	2	P:biological_process; F:transferase activity, transferring acyl groups	-	IPR020616 (PFAM); IPR016039 (G3DSA:3.40.47.GENE3D); IPR020617 (PFAM); IPR016039 (G3DSA:3.40.47.GENE3D); IPR002155 (TIGRFAM); IPR002155 (PIRSF); PTHR18919 (PANTHER); PTHR18919:SF101 (PANTHER); IPR020613 (PROSITE_PATTERNS); IPR020615 (PROSITE_PATTERNS); IPR020610 (PROSITE_PATTERNS); IPR016039 (SUPERFAMILY); IPR016039 (SUPERFAMILY)
TR36382|c0_g2_i1	heterogeneous nuclear ribonucleoprotein h2 isoform x2	3.47166	0.000139438	0.0039442	510	1	F:molecular_function	-	IPR012677 (G3DSA:3.30.70.GENE3D); PF14259 (PFAM); PTHR13976:SF36 (PANTHER); PTHR13976 (PANTHER); IPR012677 (SUPERFAMILY)
TR29793|c0_g1_i3	potassium voltage-gated channel protein eag isoform x2	3.47115	9.64e-06	0.000305207	1021	0	-		G3DSA:3.30.450.20 (GENE3D); IPR000014 (PFAM); PTHR10217:SF530 (PANTHER); PTHR10217 (PANTHER); IPR000014 (PROSITE_PROFILES); IPR000014 (SUPERFAMILY)
TR33450|c0_g1_i1	zinc finger bed domain-containing protein 4-like	3.46809	0.000397979	0.0051615	371	1	F:molecular_function	-	PTHR23272:SF42 (PANTHER); PTHR23272 (PANTHER); IPR012337 (SUPERFAMILY)
TR28708|c1_g1_i1	PREDICTED: LOW QUALITY PROTEIN: uncharacterized protein LOC100872076	3.46641	6.495e-06	0.000261163	7684	1	F:molecular_function	-	IPR000742 (SMART); G3DSA:2.170.300.10 (GENE3D); G3DSA:2.10.25.10 (GENE3D); IPR013032 (PROSITE_PATTERNS); IPR013032 (PROSITE_PATTERNS); IPR013032 (PROSITE_PATTERNS); IPR013032 (PROSITE_PATTERNS); IPR013032 (PROSITE_PATTERNS); IPR013032 (PROSITE_PATTERNS); IPR000742 (PROSITE_PROFILES); IPR000742 (PROSITE_PROFILES); IPR000742 (PROSITE_PROFILES); IPR000742 (PROSITE_PROFILES); IPR000742 (PROSITE_PROFI…
TR28761|c2_g1_i6	maverick capsid-like	3.46207	7.69958e-05	0.00127762	308	2	F:structural molecule activity; C:cellular_component	-	IPR013607 (PFAM); IPR016090 (G3DSA:1.20.90.GENE3D); IPR016090 (SUPERFAMILY)
TR33208|c1_g1_i8	zinc finger cchc domain-containing protein 9-like	3.45267	2.38825e-05	0.000864226	1044	1	F:ion binding; F:molecular_function	-	Coil (COILS); IPR001878 (SMART); IPR001878 (G3DSA:4.10.60.GENE3D); IPR001878 (G3DSA:4.10.60.GENE3D); IPR001878 (PFAM); PTHR23002 (PANTHER); IPR001878 (PROSITE_PROFILES); IPR001878 (SUPERFAMILY); IPR001878 (SUPERFAMILY)
TR6355|c0_g4_i1	PREDICTED: uncharacterized protein LOC100875083 isoform X7	3.42129	8.6786e-05	0.00259819	670	0	-		SignalP-TM (SIGNALP_GRAM_POSITIVE)
TR33196|c14_g1_i5	neuroglian-like isoform x3	3.41633	5.9335e-06	0.000263497	4324	1	F:molecular_function	-	IPR003599 (SMART); IPR003961 (SMART); IPR003598 (SMART); IPR013783 (G3DSA:2.60.40.GENE3D); IPR013783 (G3DSA:2.60.40.GENE3D); IPR013783 (G3DSA:2.60.40.GENE3D); IPR026966 (PFAM); IPR013783 (G3DSA:2.60.40.GENE3D); IPR003961 (PFAM); IPR013783 (G3DSA:2.60.40.GENE3D); IPR013783 (G3DSA:2.60.40.GENE3D); IPR013098 (PFAM); IPR013783 (G3DSA:2.60.40.GENE3D); IPR013783 (G3DSA:2.60.40.GENE3D); PTHR10489 (PANTH…
TR6295|c0_g1_i1	pr domain zinc finger protein 10-like isoform x1	3.4015	8.49696e-05	0.0025526	772	1	F:molecular_function; F:ion binding	-	Coil (COILS); IPR015880 (SMART); IPR013087 (G3DSA:3.30.160.GENE3D); IPR013087 (G3DSA:3.30.160.GENE3D); IPR013087 (G3DSA:3.30.160.GENE3D); IPR007087 (PFAM); PTHR24403:SF30 (PANTHER); PTHR24403 (PANTHER); IPR007087 (PROSITE_PATTERNS); IPR007087 (PROSITE_PATTERNS); IPR007087 (PROSITE_PATTERNS); IPR007087 (PROSITE_PATTERNS); IPR007087 (PROSITE_PATTERNS); IPR007087 (PROSITE_PROFILES); IPR007087 (PROSI…
TR27515|c1_g2_i2	protein lap4 isoform x3	3.39964	0.000376994	0.00703015	395	0	-		NON_CYTOPLASMIC_DOMAIN (PHOBIUS); SIGNAL_PEPTIDE_N_REGION (PHOBIUS); SIGNAL_PEPTIDE_C_REGION (PHOBIUS); SIGNAL_PEPTIDE (PHOBIUS); SIGNAL_PEPTIDE_H_REGION (PHOBIUS)
TR4402|c17_g1_i1	rna binding partial	3.39165	0.000172332	0.00463894	896	1	F:molecular_function	-	IPR000504 (SMART); IPR000504 (PFAM); IPR012677 (G3DSA:3.30.70.GENE3D); PTHR24012 (PANTHER); PTHR24012:SF466 (PANTHER); IPR000504 (PROSITE_PROFILES); IPR012677 (SUPERFAMILY)
TR5201|c1_g2_i1	PREDICTED: uncharacterized protein LOC107037639	3.38588	6.33858e-05	0.00196274	702	0	-		Coil (COILS)
TR14137|c0_g1_i1	chitooligosaccharidolytic beta-n-acetylglucosaminidase	3.37387	1.2475e-05	0.00033313	1398	4	F:hydrolase activity, acting on glycosyl bonds; P:carbohydrate metabolic process; P:lipid metabolic process; P:catabolic process; P:biological_process	EC:3.2.1.52	IPR025705 (PRINTS); IPR013781 (G3DSA:3.20.20.GENE3D); IPR025705 (PIRSF); IPR015883 (PFAM); IPR029018 (G3DSA:3.30.379.GENE3D); IPR029019 (PFAM); PTHR22600 (PANTHER); PTHR22600:SF0 (PANTHER); IPR017853 (SUPERFAMILY); IPR029018 (SUPERFAMILY)
TR50321|c8_g1_i4	troponin i-like isoform x6	3.37159	1.16535e-05	0.000466044	826	3	C:cytoskeleton; C:cytoplasm; C:protein complex	-	TRANSMEMBRANE (PHOBIUS); NON_CYTOPLASMIC_DOMAIN (PHOBIUS); CYTOPLASMIC_DOMAIN (PHOBIUS); TMhelix (TMHMM)
TR23848|c0_g1_i1	nadh dehydrogenase subunit 5	3.36989	2.12135e-05	0.000786923	1022	8	C:cellular_component; F:oxidoreductase activity; C:mitochondrion; P:generation of precursor metabolites and energy; P:small molecule metabolic process; P:cellular nitrogen compound metabolic process; P:biosynthetic process; P:cofactor metabolic process; P:transport	EC:1.6.5.3	no IPS match
TR39104|c3_g3_i1	general odorant-binding protein 69a-like	3.35524	5.187e-06	0.000233927	923	1	F:molecular_function	-	IPR006170 (SMART); IPR006170 (G3DSA:1.10.238.GENE3D); IPR006170 (PFAM); PTHR11857 (PANTHER); SignalP-noTM (SIGNALP_EUK); IPR006170 (SUPERFAMILY); TMhelix (TMHMM)
TR13055|c5_g1_i5	sn1-specific diacylglycerol lipase alpha isoform x4	3.35139	3.41505e-05	0.00117779	1158	0	-		PTHR21493 (PANTHER); PTHR21493:SF102 (PANTHER); CYTOPLASMIC_DOMAIN (PHOBIUS); NON_CYTOPLASMIC_DOMAIN (PHOBIUS); CYTOPLASMIC_DOMAIN (PHOBIUS); TRANSMEMBRANE (PHOBIUS); CYTOPLASMIC_DOMAIN (PHOBIUS); TRANSMEMBRANE (PHOBIUS); TRANSMEMBRANE (PHOBIUS); TRANSMEMBRANE (PHOBIUS); NON_CYTOPLASMIC_DOMAIN (PHOBIUS); TMhelix (TMHMM); TMhelix (TMHMM); TMhelix (TMHMM); TMhelix (TMHMM)
TR53880|c6_g1_i4	elks rab6-interacting cast family member 1 isoform x2	3.33395	3.355e-06	0.000141087	6560	1	C:cell	-	Coil (COILS); Coil (COILS); Coil (COILS); Coil (COILS); Coil (COILS); Coil (COILS); Coil (COILS); Coil (COILS); Coil (COILS); Coil (COILS); Coil (COILS); Coil (COILS); Coil (COILS); Coil (COILS); Coil (COILS); Coil (COILS); Coil (COILS); Coil (COILS); Coil (COILS); Coil (COILS); Coil (COILS); Coil (COILS); Coil (COILS); IPR019323 (PFAM); IPR019323 (PANTHER); SSF58100 (SUPERFAMILY); SSF57997 (SUPE…
TR8541|c3_g4_i11	muscle calcium channel subunit alpha-1 isoform x2	3.32401	2.05e-05	0.000585482	731	0	-		CYTOPLASMIC_DOMAIN (PHOBIUS); TRANSMEMBRANE (PHOBIUS); NON_CYTOPLASMIC_DOMAIN (PHOBIUS); TMhelix (TMHMM)
TR53514|c0_g1_i1	fatty acid 2-hydroxylase	3.32222	7.30005e-05	0.00223594	1557	5	P:biological_process; P:biosynthetic process; P:small molecule metabolic process; P:lipid metabolic process; F:ion binding; F:oxidoreductase activity; F:molecular_function	-	IPR001199 (G3DSA:3.10.120.GENE3D); IPR001199 (PFAM); IPR006694 (PFAM); PTHR12863 (PANTHER); IPR018506 (PROSITE_PATTERNS); NON_CYTOPLASMIC_DOMAIN (PHOBIUS); CYTOPLASMIC_DOMAIN (PHOBIUS); TRANSMEMBRANE (PHOBIUS); TRANSMEMBRANE (PHOBIUS); NON_CYTOPLASMIC_DOMAIN (PHOBIUS); CYTOPLASMIC_DOMAIN (PHOBIUS); TRANSMEMBRANE (PHOBIUS); CYTOPLASMIC_DOMAIN (PHOBIUS); TRANSMEMBRANE (PHOBIUS); IPR001199 (PROSITE_…
TR42316|c4_g1_i1	tyrosine-protein kinase abl isoform x2	3.29239	0.000117976	0.00339248	468	0	-		Coil (COILS); SignalP-TM (SIGNALP_GRAM_POSITIVE)
TR42301|c11_g1_i1	centrosomin-like isoform x4	3.23984	0.000142779	0.00216383	614	0	-		Coil (COILS)
TR48968|c0_g1_i2	odorant receptor 13a-like	3.23894	0.00011643	0.00337254	752	5	F:odorant binding; F:olfactory receptor activity; P:sensory perception of smell; C:membrane; P:detection of chemical stimulus involved in sensory perception of smell		CYTOPLASMIC_DOMAIN (PHOBIUS); TRANSMEMBRANE (PHOBIUS); CYTOPLASMIC_DOMAIN (PHOBIUS); TRANSMEMBRANE (PHOBIUS); TRANSMEMBRANE (PHOBIUS); CYTOPLASMIC_DOMAIN (PHOBIUS); NON_CYTOPLASMIC_DOMAIN (PHOBIUS); TRANSMEMBRANE (PHOBIUS); NON_CYTOPLASMIC_DOMAIN (PHOBIUS); TMhelix (TMHMM); TMhelix (TMHMM); TMhelix (TMHMM); TMhelix (TMHMM)
TR8340|c0_g1_i1	protein daple-like isoform x3	3.23142	9.815e-06	0.000364067	1381	0	-		no IPS match
TR42287|c1_g2_i5	extracellular signal-regulated kinase 2 isoform x1	3.18425	9.35494e-05	0.00277716	937	0	-		no IPS match
TR32715|c10_g10_i1	sodium channel protein 60e	3.18273	3.27925e-05	0.000642092	5819	4	C:protein complex; C:plasma membrane; P:transport; F:transmembrane transporter activity; P:transmembrane transport; F:molecular_function	-	Coil (COILS); IPR001696 (PRINTS); IPR010526 (PFAM); G3DSA:1.20.5.150 (GENE3D); IPR027359 (G3DSA:1.20.120.GENE3D); IPR031649 (PFAM); IPR005821 (PFAM); G3DSA:1.10.287.930 (GENE3D); IPR028820 (PTHR10037:PANTHER); PTHR10037 (PANTHER); IPR028820 (PTHR10037:PANTHER); PTHR10037 (PANTHER); IPR028820 (PTHR10037:PANTHER); PTHR10037 (PANTHER); TRANSMEMBRANE (PHOBIUS); CYTOPLASMIC_DOMAIN (PHOBIUS); TRANSMEMB…
TR41889|c3_g2_i4	phospholipase a2-like	3.15814	0.000119705	0.00343866	748	1	P:lipid metabolic process	-	IPR016090 (G3DSA:1.20.90.GENE3D); IPR016090 (PFAM); PTHR12253 (PANTHER); IPR033113 (PROSITE_PATTERNS); SIGNAL_PEPTIDE_C_REGION (PHOBIUS); SIGNAL_PEPTIDE (PHOBIUS); SIGNAL_PEPTIDE_H_REGION (PHOBIUS); NON_CYTOPLASMIC_DOMAIN (PHOBIUS); SIGNAL_PEPTIDE_N_REGION (PHOBIUS); PS51257 (PROSITE_PROFILES); SignalP-TM (SIGNALP_GRAM_POSITIVE); IPR016090 (SUPERFAMILY); TMhelix (TMHMM)
TR29832|c0_g1_i1	protein serac1	3.15315	0.00017297	0.00379778	1633	1	F:molecular_function	-	IPR011989 (G3DSA:1.25.10.GENE3D); PTHR22731:SF1 (PANTHER); PTHR22731 (PANTHER); TRANSMEMBRANE (PHOBIUS); NON_CYTOPLASMIC_DOMAIN (PHOBIUS); CYTOPLASMIC_DOMAIN (PHOBIUS); IPR016024 (SUPERFAMILY); TMhelix (TMHMM)
TR437|c2_g1_i1	disintegrin and metalloproteinase domain-containing protein	3.13788	0.00014953	0.00416118	621	2	F:peptidase activity; P:biological_process; P:signal transduction	EC:3.4.24	NON_CYTOPLASMIC_DOMAIN (PHOBIUS); CYTOPLASMIC_DOMAIN (PHOBIUS); TRANSMEMBRANE (PHOBIUS); TMhelix (TMHMM)
TR4439|c3_g2_i1	tropomodulin isoform x3	3.12754	2.015e-05	0.000707444	1567	3	P:cytoskeleton organization; P:protein complex assembly; F:cytoskeletal protein binding	-	IPR032675 (G3DSA:3.80.10.GENE3D); IPR004934 (PFAM); IPR004934 (PANTHER); IPR030137 (PTHR10901:PANTHER); SignalP-TM (SIGNALP_GRAM_POSITIVE); SSF52047 (SUPERFAMILY)
TR48140|c0_g1_i2	probable pterin-4-alpha-carbinolamine dehydratase	3.12697	2.72e-05	0.000946137	497	4	F:lyase activity; P:cellular nitrogen compound metabolic process; P:biosynthetic process; P:cofactor metabolic process	EC:4.2.1.96	IPR001533 (G3DSA:3.30.1360.GENE3D); IPR001533 (PFAM); PTHR12599:SF7 (PANTHER); IPR001533 (PANTHER); IPR001533 (SUPERFAMILY)
TR50289|c5_g1_i2	kinase d-interacting substrate of 220 kda isoform x3	3.11304	7.35041e-05	0.00157214	928	0	-		no IPS match
TR7388|c0_g1_i2	anion exchange protein 3 isoform x1	3.07306	5.34e-05	0.00168467	1547	3	F:transmembrane transporter activity; C:cellular_component; P:transport	-	IPR001717 (PRINTS); IPR003020 (PRINTS); IPR013769 (G3DSA:3.40.1100.GENE3D); G3DSA:1.10.287.570 (GENE3D); IPR011531 (PFAM); IPR013769 (PFAM); IPR003020 (PANTHER); PTHR11453:SF47 (PANTHER); TRANSMEMBRANE (PHOBIUS); CYTOPLASMIC_DOMAIN (PHOBIUS); TRANSMEMBRANE (PHOBIUS); NON_CYTOPLASMIC_DOMAIN (PHOBIUS); TRANSMEMBRANE (PHOBIUS); CYTOPLASMIC_DOMAIN (PHOBIUS); NON_CYTOPLASMIC_DOMAIN (PHOBIUS); IPR01615…
TR28708|c1_g1_i6	neurogenic locus notch-like protein protein 1	3.05752	0.000128335	0.00365741	6522	1	F:molecular_function	-	IPR000742 (SMART); G3DSA:2.10.25.10 (GENE3D); IPR013032 (PROSITE_PATTERNS); IPR000742 (PROSITE_PROFILES); IPR009030 (SUPERFAMILY)
TR32906|c1_g6_i5	phosphatidylinositol 4-phosphate 5-kinase type-1 gamma isoform x8	3.05595	0.000149248	0.00410357	632	2	P:lipid metabolic process; F:kinase activity	EC:2.7.1	no IPS match
TR31613|c1_g3_i1	PREDICTED: uncharacterized protein LOC103576139	3.01683	0.000141176	0.00220312	518	0	-		IPR019523 (PFAM); PTHR16489 (PANTHER)
TR45734|c1_g1_i1	gata zinc finger domain-containing protein 14-like	2.97948	0.000122187	0.00345234	1289	0	-		no IPS match
TR53904|c1_g2_i1	udp-glucuronosyltransferase 2b20-like	2.94444	0.000144821	0.00406047	2240	2	P:biological_process; F:transferase activity, transferring glycosyl groups	-	G3DSA:3.40.50.2000 (GENE3D); IPR002213 (PFAM); PTHR11926:SF284 (PANTHER); IPR002213 (PANTHER); IPR002213 (PROSITE_PATTERNS); TRANSMEMBRANE (PHOBIUS); SIGNAL_PEPTIDE (PHOBIUS); NON_CYTOPLASMIC_DOMAIN (PHOBIUS); SIGNAL_PEPTIDE_N_REGION (PHOBIUS); SIGNAL_PEPTIDE_H_REGION (PHOBIUS); CYTOPLASMIC_DOMAIN (PHOBIUS); SIGNAL_PEPTIDE_C_REGION (PHOBIUS); SignalP-noTM (SIGNALP_EUK); SSF53756 (SUPERFAMILY); TM…
TR8117|c1_g2_i10	cytoplasmic dynein 1 intermediate chain isoform x5	2.93792	9.73905e-05	0.00244503	889	0	-		SIGNAL_PEPTIDE_N_REGION (PHOBIUS); NON_CYTOPLASMIC_DOMAIN (PHOBIUS); SIGNAL_PEPTIDE_H_REGION (PHOBIUS); SIGNAL_PEPTIDE_C_REGION (PHOBIUS); SIGNAL_PEPTIDE (PHOBIUS); SignalP-noTM (SIGNALP_EUK)
TR27857|c1_g1_i1	electron transfer flavoprotein subunit beta	2.92965	0.000117383	0.00339344	1260	1	F:molecular_function	-	TMhelix (TMHMM)
TR52587|c0_g1_i1	probable phosphorylase b kinase regulatory subunit alpha isoform x6	2.88764	0.000113363	0.00329213	3895	0	-		NON_CYTOPLASMIC_DOMAIN (PHOBIUS); TRANSMEMBRANE (PHOBIUS); CYTOPLASMIC_DOMAIN (PHOBIUS); TMhelix (TMHMM)
TR19671|c6_g1_i2	PREDICTED: uncharacterized protein LOC105264581	2.8872	4.16e-05	0.00105483	1586	0	-		IPR015897 (SMART); G3DSA:3.90.1200.10 (GENE3D); IPR004119 (PFAM); PTHR11012 (PANTHER); IPR011009 (SUPERFAMILY)
TR50321|c8_g1_i1	troponin i isoform x8	2.86983	4.38e-05	0.00125577	844	3	C:cytoskeleton; C:cytoplasm; C:protein complex	-	no IPS match
TR12534|c0_g1_i1	glutathione s-transferase 1-1-like	2.86736	5.135e-05	0.00153888	1151	1	F:molecular_function	-	IPR004046 (PFAM); IPR010987 (G3DSA:1.20.1050.GENE3D); IPR012336 (G3DSA:3.40.30.GENE3D); IPR004045 (PFAM); PTHR11260 (PANTHER); PTHR11260:SF166 (PANTHER); IPR010987 (PROSITE_PROFILES); IPR004045 (PROSITE_PROFILES); IPR012336 (SUPERFAMILY); IPR010987 (SUPERFAMILY)
TR29774|c0_g1_i5	abc transporter f family member 4-like	2.8585	9.08e-05	0.00233954	1805	0	-		IPR032763 (PFAM); TRANSMEMBRANE (PHOBIUS); TRANSMEMBRANE (PHOBIUS); CYTOPLASMIC_DOMAIN (PHOBIUS); CYTOPLASMIC_DOMAIN (PHOBIUS); NON_CYTOPLASMIC_DOMAIN (PHOBIUS); TMhelix (TMHMM); TMhelix (TMHMM)
TR34644|c0_g1_i2	splicing factor 1	2.80845	0.000151881	0.00418109	1945	3	F:ion binding; P:mRNA processing; F:RNA binding	-	IPR001878 (SMART); IPR004087 (SMART); IPR004088 (G3DSA:3.30.1370.GENE3D); IPR004088 (PFAM); IPR032570 (PFAM); IPR001878 (PFAM); IPR001878 (G3DSA:4.10.60.GENE3D); IPR031150 (PTHR11208:PANTHER); PTHR11208 (PANTHER); IPR001878 (PROSITE_PROFILES); IPR004088 (PROSITE_PROFILES); IPR001878 (SUPERFAMILY); IPR004088 (SUPERFAMILY)
TR19365|c2_g1_i6	cdk5 and abl1 enzyme substrate 2 isoform x1	2.79708	9.50473e-05	0.00232732	2380	0	-		CYTOPLASMIC_DOMAIN (PHOBIUS); TRANSMEMBRANE (PHOBIUS); NON_CYTOPLASMIC_DOMAIN (PHOBIUS); TMhelix (TMHMM)
TR20105|c0_g1_i4	band 7 protein agap004871 isoform x2	2.70791	0.000198335	0.00393264	636	1	C:cellular_component	-	IPR001972 (PRINTS); IPR001107 (PFAM); IPR001972 (PANTHER); PTHR10264:SF77 (PANTHER); IPR018080 (PROSITE_PATTERNS); IPR001107 (SUPERFAMILY)
TR5586|c5_g1_i3	asparagine synthetase	2.70555	0.00025953	0.00557429	1985	4	P:cellular amino acid metabolic process; P:biosynthetic process; P:cellular nitrogen compound metabolic process; F:ligase activity	EC:6.3.5.4	IPR006426 (TIGRFAM); IPR014729 (G3DSA:3.40.50.GENE3D); IPR001962 (PFAM); IPR017932 (PFAM); IPR014729 (G3DSA:3.40.50.GENE3D); IPR029055 (G3DSA:3.60.20.GENE3D); PTHR11772 (PANTHER); PTHR11772:SF2 (PANTHER); IPR017932 (PROSITE_PROFILES); SSF52402 (SUPERFAMILY); IPR029055 (SUPERFAMILY)		TR5586|c5_g1_i3
TR31605|c3_g1_i2	PREDICTED: uncharacterized protein LOC105268558	2.61311	0.000254967	0.00490948	2558	0	-		PTHR36300:SF1 (PANTHER); PTHR36300 (PANTHER)
TR28749|c10_g1_i7	hemicentin-1 isoform x2	2.52017	0.000300562	0.00621941	3953	1	F:molecular_function	-	IPR013106 (SMART); IPR003598 (SMART); IPR003599 (SMART); IPR013162 (PFAM); IPR013098 (PFAM); IPR013783 (G3DSA:2.60.40.GENE3D); IPR007110 (PFAM); PF13927 (PFAM); IPR013783 (G3DSA:2.60.40.GENE3D); IPR013783 (G3DSA:2.60.40.GENE3D); IPR013783 (G3DSA:2.60.40.GENE3D); IPR013783 (G3DSA:2.60.40.GENE3D); IPR013783 (G3DSA:2.60.40.GENE3D); IPR013106 (PFAM); PTHR11640:SF6 (PANTHER); PTHR11640 (PANTHER); CYTO…
TR466|c7_g1_i2	PREDICTED: uncharacterized protein LOC107042611 isoform X1	2.49483	0.00033279	0.00592525	1296	0	-		no IPS match

## Sheet: Ae - SA up - Head
Suplementary table 1, page 4: genes up-regulated in Heads of Aphidius ervi - SA compared to Aphidius ervi - AP
ID	Sequence description	LogFC	PValue	FDR	Seq Length	#Gos	Gos	Enzyme Codes	InterProScan
TR53728|c7_g1_i11	sodium channel protein para isoform x10	13.952	4.97566e-21	6.30644e-18	8679	6	P:transport; F:transmembrane transporter activity; C:protein complex; C:plasma membrane; P:transmembrane transport; F:ion binding	-	Coil (COILS); Coil (COILS); IPR001696 (PRINTS); IPR031649 (PFAM); G3DSA:1.20.5.150 (GENE3D); IPR010526 (PFAM); IPR027359 (G3DSA:1.20.120.GENE3D); IPR005821 (PFAM); IPR024583 (PFAM); PTHR10037:SF62 (PANTHER); PTHR10037 (PANTHER); PTHR10037 (PANTHER); TRANSMEMBRANE (PHOBIUS); TRANSMEMBRANE (PHOBIUS); CYTOPLASMIC_DOMAIN (PHOBIUS); CYTOPLASMIC_DOMAIN (PHOBIUS); CYTOPLASMIC_DOMAIN (PHOBIUS); NON_CYTOP…
TR49009|c9_g1_i5	voltage-dependent calcium channel subunit alpha-2 delta-3 isoform x2	13.5707	6.80402e-20	6.56967e-17	4129	1	F:molecular_function	-	IPR002035 (SMART); IPR013608 (PFAM); IPR002035 (G3DSA:3.40.50.GENE3D); IPR033479 (PFAM); IPR009072 (G3DSA:1.10.20.GENE3D); IPR013680 (PFAM); G3DSA:3.30.450.20 (GENE3D); PTHR10166 (PANTHER); PTHR10166 (PANTHER); PTHR10166:SF29 (PANTHER); PTHR10166:SF29 (PANTHER); SIGNAL_PEPTIDE_C_REGION (PHOBIUS); SIGNAL_PEPTIDE_H_REGION (PHOBIUS); NON_CYTOPLASMIC_DOMAIN (PHOBIUS); SIGNAL_PEPTIDE (PHOBIUS); SIGNAL…
TR53758|c1_g1_i2	PREDICTED: uncharacterized protein LOC105272388 isoform X3	13.2762	5.0986e-19	3.11659e-16	1511	0	-		Coil (COILS); Coil (COILS); Coil (COILS); Coil (COILS)
TR5241|c0_g1_i1	hypothetical protein SINV_09195	12.6535	3.56211e-17	1.34643e-14	2513	0	-		Coil (COILS); IPR004242 (PFAM); IPR009667 (PFAM); PTHR33053:SF8 (PANTHER); PTHR33053 (PANTHER)
TR37911|c0_g2_i7	focal adhesion kinase 1 isoform x1	12.6041	4.9532e-17	1.83148e-14	3037	4	P:cellular protein modification process; F:kinase activity; F:ion binding; C:cytoskeleton	EC:2.7.10	Coil (COILS); IPR001245 (PRINTS); IPR020635 (SMART); IPR019749 (SMART); IPR001245 (PFAM); G3DSA:3.30.200.20 (GENE3D); G3DSA:1.10.510.10 (GENE3D); IPR019748 (PFAM); IPR014352 (G3DSA:1.20.80.GENE3D); PTHR24418:SF273 (PANTHER); PTHR24418 (PANTHER); IPR008266 (PROSITE_PATTERNS); IPR017441 (PROSITE_PATTERNS); TRANSMEMBRANE (PHOBIUS); CYTOPLASMIC_DOMAIN (PHOBIUS); NON_CYTOPLASMIC_DOMAIN (PHOBIUS); TRAN…
TR43558|c0_g1_i1	PREDICTED: uncharacterized protein LOC107045241	12.5367	7.84892e-17	2.76641e-14	1404	1	F:molecular_function	-	IPR012337 (G3DSA:3.30.420.GENE3D); PTHR19277:SF104 (PANTHER); PTHR19277 (PANTHER); IPR012337 (SUPERFAMILY)
TR24719|c12_g1_i5	PREDICTED: ubiquilin-1	12.4832	1.12195e-16	3.79718e-14	382	0	-		NON_CYTOPLASMIC_DOMAIN (PHOBIUS); NON_CYTOPLASMIC_DOMAIN (PHOBIUS); TRANSMEMBRANE (PHOBIUS); TRANSMEMBRANE (PHOBIUS); CYTOPLASMIC_DOMAIN (PHOBIUS); TRANSMEMBRANE (PHOBIUS); CYTOPLASMIC_DOMAIN (PHOBIUS); CYTOPLASMIC_DOMAIN (PHOBIUS); TRANSMEMBRANE (PHOBIUS); TMhelix (TMHMM); TMhelix (TMHMM); TMhelix (TMHMM)
TR42263|c2_g1_i2	mitogen-activated protein kinase-binding protein 1-like isoform x5	12.2901	4.16187e-16	1.22587e-13	2550	0	-		no IPS match
TR9014|c15_g1_i2	a disintegrin and metalloproteinase with thrombospondin motifs 8 isoform x8	12.2182	6.78575e-16	1.87943e-13	3950	4	F:ion binding; C:proteinaceous extracellular matrix; F:peptidase activity; P:biological_process	EC:3.4.24	Coil (COILS); IPR013273 (PRINTS); IPR000884 (SMART); IPR024079 (G3DSA:3.40.390.GENE3D); G3DSA:2.20.100.10 (GENE3D); IPR000884 (PFAM); IPR001590 (PFAM); PTHR13723 (PANTHER); PTHR13723:SF189 (PANTHER); IPR001590 (PROSITE_PROFILES); IPR000884 (PROSITE_PROFILES); SSF55486 (SUPERFAMILY); IPR000884 (SUPERFAMILY)
TR49009|c9_g1_i4	voltage-dependent calcium channel subunit alpha-2 delta-3 isoform x1	12.0138	2.64437e-15	6.34841e-13	4114	1	F:molecular_function	-	IPR002035 (SMART); G3DSA:3.30.450.20 (GENE3D); IPR009072 (G3DSA:1.10.20.GENE3D); IPR002035 (G3DSA:3.40.50.GENE3D); IPR033479 (PFAM); IPR013608 (PFAM); IPR013680 (PFAM); PTHR10166:SF29 (PANTHER); PTHR10166 (PANTHER); PTHR10166 (PANTHER); PTHR10166:SF29 (PANTHER); SIGNAL_PEPTIDE_C_REGION (PHOBIUS); SIGNAL_PEPTIDE_N_REGION (PHOBIUS); NON_CYTOPLASMIC_DOMAIN (PHOBIUS); SIGNAL_PEPTIDE_H_REGION (PHOBIUS…
TR18782|c1_g1_i1	serine arginine repetitive matrix protein 2 isoform x2	12.0019	2.9069e-15	6.78043e-13	585	0	-		no IPS match
TR31615|c2_g1_i1	PREDICTED: uncharacterized protein LOC105456969	11.9187	5.06874e-15	1.12297e-12	2448	2	P:proteolysis; F:cysteine-type peptidase activity		Coil (COILS); SSF54001 (SUPERFAMILY)
TR18848|c5_g1_i1	rhotekin-like isoform x3	11.5205	1.19032e-14	2.61678e-12	1652	0	-		Coil (COILS); IPR012966 (PFAM); PTHR21538 (PANTHER)
TR27559|c2_g1_i4	rho gtpase-activating protein 190 isoform x1	11.3589	3.45667e-14	6.75641e-12	5248	3	F:ion binding; C:cellular_component; P:signal transduction	-	Coil (COILS); IPR000198 (SMART); IPR020849 (SMART); IPR000198 (G3DSA:1.10.555.GENE3D); IPR000198 (PFAM); IPR032835 (PFAM); IPR027417 (G3DSA:3.40.50.GENE3D); IPR001806 (PFAM); PTHR23175:SF4 (PANTHER); PTHR23175 (PANTHER); PTHR23175:SF4 (PANTHER); PTHR23175 (PANTHER); PTHR23175 (PANTHER); PTHR23175:SF4 (PANTHER); IPR002713 (PROSITE_PROFILES); IPR002713 (PROSITE_PROFILES); IPR000198 (PROSITE_PROFILE…
TR42263|c2_g1_i3	mitogen-activated protein kinase-binding protein 1 isoform x1	11.2943	5.3543e-14	1.00086e-11	1596	0	-		no IPS match
TR23225|c0_g2_i6	serine threonine-protein kinase ick-like isoform x2	11.2388	7.56873e-14	1.37275e-11	1531	3	F:ion binding; F:kinase activity; P:cellular protein modification process	-	IPR002290 (SMART); G3DSA:3.30.200.20 (GENE3D); IPR000719 (PFAM); G3DSA:1.10.510.10 (GENE3D); PTHR24055:SF194 (PANTHER); PTHR24055 (PANTHER); IPR008271 (PROSITE_PATTERNS); IPR017441 (PROSITE_PATTERNS); IPR000719 (PROSITE_PROFILES); IPR011009 (SUPERFAMILY)
TR42270|c3_g5_i15	calcium-activated potassium channel slowpoke isoform x16	11.1514	1.3703e-13	2.38796e-11	2069	4	P:transmembrane transport; F:transmembrane transporter activity; C:protein complex; C:plasma membrane	-	IPR028325 (PRINTS); IPR003929 (PRINTS); IPR005821 (PFAM); G3DSA:1.10.287.70 (GENE3D); IPR016040 (G3DSA:3.40.50.GENE3D); IPR003929 (PFAM); PTHR10027 (PANTHER); IPR024939 (PTHR10027:PANTHER); TRANSMEMBRANE (PHOBIUS); NON_CYTOPLASMIC_DOMAIN (PHOBIUS); TRANSMEMBRANE (PHOBIUS); TRANSMEMBRANE (PHOBIUS); NON_CYTOPLASMIC_DOMAIN (PHOBIUS); TRANSMEMBRANE (PHOBIUS); CYTOPLASMIC_DOMAIN (PHOBIUS); TRANSMEMBRA…
TR28916|c0_g3_i4	liprin-beta-1 isoform x4	11.1471	1.39225e-13	2.41726e-11	2142	1	F:molecular_function	-	Coil (COILS); IPR001660 (SMART); IPR001660 (PFAM); IPR013761 (G3DSA:1.10.150.GENE3D); IPR001660 (PFAM); PTHR12776 (PANTHER); PTHR12776:SF2 (PANTHER); IPR001660 (PROSITE_PROFILES); IPR001660 (PROSITE_PROFILES); IPR013761 (SUPERFAMILY); IPR013761 (SUPERFAMILY)
TR5686|c0_g1_i1	rna-directed dna polymerase from mobile element jockey-like	11.0855	2.07777e-13	3.48403e-11	1130	3	F:molecular_function; F:nuclease activity; P:cellular nitrogen compound metabolic process	EC:3.1.26.4	IPR002156 (PFAM); IPR012337 (G3DSA:3.30.420.GENE3D); PTHR10642:SF3 (PANTHER); PTHR10642 (PANTHER); IPR002156 (PROSITE_PROFILES); IPR012337 (SUPERFAMILY)
TR4388|c16_g1_i1	whirlin isoform x1	11.0537	2.57569e-13	4.2496e-11	2990	1	F:molecular_function	-	IPR001478 (SMART); IPR001478 (G3DSA:2.30.42.GENE3D); IPR001478 (PFAM); IPR001478 (G3DSA:2.30.42.GENE3D); IPR001478 (G3DSA:2.30.42.GENE3D); PTHR23116 (PANTHER); IPR001478 (PROSITE_PROFILES); IPR001478 (PROSITE_PROFILES); IPR001478 (PROSITE_PROFILES); IPR001478 (SUPERFAMILY); IPR001478 (SUPERFAMILY); IPR001478 (SUPERFAMILY)
TR15754|c0_g1_i1	hypothetical protein	10.9539	4.94803e-13	7.70359e-11	2540	0	-		no IPS match
TR52871|c3_g1_i2	carotenoid isomerooxygenase-like	10.9089	6.64928e-13	1.01525e-10	733	2	P:biological_process; F:oxidoreductase activity	EC:1.13.11	IPR004294 (PFAM); PTHR10543:SF24 (PANTHER); IPR004294 (PANTHER)
TR11936|c2_g2_i3	protein lethal essential for life-like	10.9053	3.30429e-17	1.50982e-14	1119	0	-		IPR001436 (PRINTS); IPR008978 (G3DSA:2.60.40.GENE3D); IPR001436 (PIRSF); IPR002068 (PFAM); IPR031107 (PANTHER); PTHR11527:SF120 (PANTHER); IPR002068 (PROSITE_PROFILES); IPR008978 (SUPERFAMILY)
TR33886|c0_g2_i1	shootin-1 isoform x2	10.7308	2.11499e-12	2.98311e-10	1210	0	-		Coil (COILS); Coil (COILS); Coil (COILS); Coil (COILS); Coil (COILS)
TR48264|c0_g1_i1	kda protein in nof-fb transposable element	10.6662	3.18806e-12	4.3774e-10	1658	0	-		no IPS match
TR5656|c4_g1_i1	nuclear protein localization protein 4 homolog isoform x2	10.6602	3.34032e-12	4.52289e-10	2418	2	F:ion binding; P:catabolic process	-	IPR001876 (SMART); IPR024682 (PFAM); IPR007716 (PFAM); G3DSA:3.10.20.90 (GENE3D); IPR016563 (PIRSF); IPR007717 (PFAM); PTHR12710 (PANTHER); IPR001876 (PROSITE_PATTERNS); IPR001876 (PROSITE_PROFILES); IPR029071 (SUPERFAMILY); IPR001876 (SUPERFAMILY)
TR34068|c0_g1_i2	microtubule-associated protein futsch-like isoform x3	10.3961	1.83178e-11	2.2174e-09	873	0	-		Coil (COILS); Coil (COILS)
TR32664|c2_g1_i3	zinc finger matrin-type protein cg9776-like isoform x2	10.3445	2.50219e-11	2.93145e-09	470	0	-		SignalP-TM (SIGNALP_GRAM_POSITIVE)
TR19336|c1_g1_i10	fh1 fh2 domain-containing protein 3 isoform x4	10.2594	4.36423e-11	4.97603e-09	4368	1	F:molecular_function	-	IPR015425 (SMART); IPR015425 (PFAM); PTHR23213 (PANTHER); PTHR23213:SF184 (PANTHER); PTHR23213 (PANTHER); IPR014768 (PROSITE_PROFILES); IPR015425 (PROSITE_PROFILES); IPR016024 (SUPERFAMILY); SSF101447 (SUPERFAMILY)
TR37565|c6_g3_i1	PREDICTED: uncharacterized protein LOC103574270	10	9.68913e-14	1.94022e-11	1590	0	-		no IPS match
TR29461|c0_g1_i1	kda protein in nof-fb transposable element	9.98866	2.32434e-10	2.33091e-08	1210	0	-		no IPS match
TR41810|c12_g5_i10	vinculin isoform x9	9.98721	1.01825e-14	2.40004e-12	3635	4	P:cell adhesion; F:cytoskeletal protein binding; C:cytoskeleton; F:structural molecule activity	-	PR00806 (PRINTS); G3DSA:1.20.1490.10 (GENE3D); IPR006077 (PFAM); G3DSA:1.20.120.230 (GENE3D); G3DSA:1.20.120.230 (GENE3D); G3DSA:1.20.120.230 (GENE3D); G3DSA:1.20.120.230 (GENE3D); PTHR18914:SF1 (PANTHER); IPR006077 (PANTHER); IPR006077 (PANTHER); PTHR18914:SF1 (PANTHER); PTHR18914:SF1 (PANTHER); IPR000633 (PROSITE_PATTERNS); IPR006077 (SUPERFAMILY); IPR006077 (SUPERFAMILY); IPR006077 (SUPERFAMIL…
TR30823|c0_g1_i1	zinc finger protein 853-like isoform x1	9.92982	3.34453e-10	3.2366e-08	1768	2	F:molecular_function; F:ion binding	-	Coil (COILS); Coil (COILS); Coil (COILS); Coil (COILS); IPR015880 (SMART); IPR013087 (G3DSA:3.30.160.GENE3D); PF12874 (PFAM); IPR013087 (G3DSA:3.30.160.GENE3D); IPR007087 (PFAM); IPR013087 (G3DSA:3.30.160.GENE3D); IPR007087 (PFAM); IPR013087 (G3DSA:3.30.160.GENE3D); PTHR24409 (PANTHER); IPR007087 (PROSITE_PATTERNS); IPR007087 (PROSITE_PATTERNS); IPR007087 (PROSITE_PATTERNS); IPR007087 (PROSITE_PA…
TR30823|c0_g1_i9	zinc finger protein rotund isoform x7	9.85801	5.27109e-10	4.8996e-08	1750	2	F:molecular_function; F:ion binding	-	Coil (COILS); Coil (COILS); Coil (COILS); Coil (COILS); IPR015880 (SMART); IPR013087 (G3DSA:3.30.160.GENE3D); IPR013087 (G3DSA:3.30.160.GENE3D); IPR007087 (PFAM); IPR007087 (PFAM); IPR013087 (G3DSA:3.30.160.GENE3D); IPR013087 (G3DSA:3.30.160.GENE3D); PF12874 (PFAM); PTHR24409 (PANTHER); IPR007087 (PROSITE_PATTERNS); IPR007087 (PROSITE_PATTERNS); IPR007087 (PROSITE_PATTERNS); IPR007087 (PROSITE_PA…
TR42289|c7_g1_i10	phosphatidylinositol-binding clathrin assembly protein lap isoform x16	9.85801	5.27109e-10	4.8996e-08	643	0	-		no IPS match
TR53880|c6_g1_i1	elks rab6-interacting cast family member 1 isoform x2	9.76378	1.86925e-07	1.2727e-05	6550	1	C:cell	-	Coil (COILS); Coil (COILS); Coil (COILS); Coil (COILS); Coil (COILS); Coil (COILS); Coil (COILS); Coil (COILS); Coil (COILS); Coil (COILS); Coil (COILS); Coil (COILS); Coil (COILS); Coil (COILS); Coil (COILS); Coil (COILS); Coil (COILS); Coil (COILS); Coil (COILS); Coil (COILS); Coil (COILS); Coil (COILS); Coil (COILS); IPR019323 (PFAM); IPR019323 (PANTHER); SSF57997 (SUPERFAMILY)
TR20498|c0_g2_i1	hypothetical protein X777_13718	9.69785	1.11838e-13	1.57942e-11	2384	0	-		PTHR33053 (PANTHER); PTHR33053:SF3 (PANTHER); TRANSMEMBRANE (PHOBIUS); NON_CYTOPLASMIC_DOMAIN (PHOBIUS); CYTOPLASMIC_DOMAIN (PHOBIUS)
TR21226|c0_g1_i1	nfu1 iron-sulfur cluster scaffold mitochondrial-like	9.58048	2.84517e-09	2.35989e-07	441	4	F:ion binding; P:biosynthetic process; P:cellular component assembly; F:molecular_function	-	IPR001075 (PFAM); PIRSF036773 (PIRSF); IPR017065 (PTHR11178:PANTHER); PTHR11178 (PANTHER); IPR001075 (PRODOM); SSF117916 (SUPERFAMILY)
TR42270|c3_g5_i12	calcium-activated potassium channel slowpoke isoform x6	9.53954	3.45348e-13	4.47705e-11	932	4	P:transmembrane transport; F:transmembrane transporter activity; C:protein complex; C:plasma membrane	-	IPR003280 (PRINTS); IPR028325 (PRINTS); IPR005821 (PFAM); G3DSA:1.10.287.70 (GENE3D); G3DSA:1.10.287.70 (GENE3D); PTHR10027:SF29 (PANTHER); PTHR10027 (PANTHER); NON_CYTOPLASMIC_DOMAIN (PHOBIUS); NON_CYTOPLASMIC_DOMAIN (PHOBIUS); NON_CYTOPLASMIC_DOMAIN (PHOBIUS); CYTOPLASMIC_DOMAIN (PHOBIUS); TRANSMEMBRANE (PHOBIUS); TRANSMEMBRANE (PHOBIUS); CYTOPLASMIC_DOMAIN (PHOBIUS); CYTOPLASMIC_DOMAIN (PHOBIU…
TR54738|c2_g1_i6	dachshund homolog 2 isoform x2	9.33052	1.25253e-08	9.18634e-07	1313	1	F:molecular_function	-	IPR003380 (G3DSA:3.10.260.GENE3D); IPR003380 (PFAM); IPR000253 (G3DSA:2.60.200.GENE3D); PTHR12577:SF6 (PANTHER); PTHR12577 (PANTHER); PTHR12577:SF6 (PANTHER); PTHR12577 (PANTHER); IPR009061 (SUPERFAMILY)
TR52616|c5_g1_i30	rna-binding protein musashi homolog rbp6 isoform x2	9.10997	3.372e-11	2.88851e-09	795	1	F:molecular_function	-	IPR000504 (SMART); IPR000504 (PFAM); IPR012677 (G3DSA:3.30.70.GENE3D); PTHR24012:SF476 (PANTHER); PTHR24012 (PANTHER); PTHR24012:SF476 (PANTHER); IPR000504 (PROSITE_PROFILES); IPR000504 (PROSITE_PROFILES); IPR012677 (SUPERFAMILY); IPR012677 (SUPERFAMILY)
TR53906|c0_g1_i2	leucine-rich ppr motif-containing mitochondrial-like	9.0649	5.56105e-08	3.56176e-06	1833	0	-		Coil (COILS); IPR033443 (PFAM); IPR002885 (TIGRFAM); PTHR24015 (PANTHER); PTHR24015:SF187 (PANTHER); IPR002885 (PROSITE_PROFILES); IPR002885 (PROSITE_PROFILES); IPR002885 (PROSITE_PROFILES); IPR002885 (PROSITE_PROFILES)
TR52842|c10_g2_i1	protein alan shepard isoform x1	9.05672	5.55837e-10	6.22609e-08	1506	2	F:RNA binding; F:molecular_function	-	IPR002343 (PRINTS); IPR000504 (SMART); IPR012677 (G3DSA:3.30.70.GENE3D); IPR012677 (G3DSA:3.30.70.GENE3D); IPR000504 (PFAM); PTHR24012 (PANTHER); PTHR24012:SF429 (PANTHER); PTHR24012 (PANTHER); PTHR24012:SF429 (PANTHER); IPR000504 (PROSITE_PROFILES); IPR000504 (PROSITE_PROFILES); IPR012677 (SUPERFAMILY); IPR012677 (SUPERFAMILY)
TR8493|c8_g1_i2	PREDICTED: uncharacterized protein KIAA0195 isoform X2	8.94131	3.4842e-11	4.83946e-09	4856	2	F:molecular_function; F:ion binding	-	Coil (COILS); IPR023299 (G3DSA:3.40.1110.GENE3D); IPR023298 (G3DSA:1.20.1110.GENE3D); IPR008250 (G3DSA:2.70.150.GENE3D); PTHR13219:SF6 (PANTHER); PTHR13219 (PANTHER); TRANSMEMBRANE (PHOBIUS); TRANSMEMBRANE (PHOBIUS); NON_CYTOPLASMIC_DOMAIN (PHOBIUS); CYTOPLASMIC_DOMAIN (PHOBIUS); CYTOPLASMIC_DOMAIN (PHOBIUS); TRANSMEMBRANE (PHOBIUS); TRANSMEMBRANE (PHOBIUS); NON_CYTOPLASMIC_DOMAIN (PHOBIUS); CYTO…
TR24710|c25_g3_i1	juxtaposed with another zinc finger protein 1	8.91117	1.37535e-07	8.13788e-06	736	0	-		no IPS match
TR34100|c1_g1_i4	transmembrane protein 184b isoform x2	8.84901	1.80989e-07	1.04019e-05	583	0	-		IPR005178 (PFAM); PTHR23423:SF32 (PANTHER); IPR005178 (PANTHER)
TR49013|c22_g1_i4	serine threonine-protein phosphatase 4 regulatory subunit 4-like isoform x1	8.8328	4.04232e-05	0.0013445	4286	1	F:molecular_function	-	IPR011989 (G3DSA:1.25.10.GENE3D); PTHR21467 (PANTHER); IPR021133 (PROSITE_PROFILES); IPR021133 (PROSITE_PROFILES); IPR021133 (PROSITE_PROFILES); IPR016024 (SUPERFAMILY)
TR16832|c4_g1_i4	muscle m-line assembly protein unc-89	8.82769	2.08221e-07	1.17728e-05	4014	1	F:molecular_function	-	PR00014 (PRINTS); IPR003598 (SMART); IPR003599 (SMART); IPR003961 (SMART); IPR013783 (G3DSA:2.60.40.GENE3D); IPR013783 (G3DSA:2.60.40.GENE3D); IPR013783 (G3DSA:2.60.40.GENE3D); IPR013098 (PFAM); IPR003961 (PFAM); PTHR10489 (PANTHER); NON_CYTOPLASMIC_DOMAIN (PHOBIUS); CYTOPLASMIC_DOMAIN (PHOBIUS); TRANSMEMBRANE (PHOBIUS); IPR007110 (PROSITE_PROFILES); IPR003961 (PROSITE_PROFILES); IPR003961 (PROSI…
TR6248|c0_g2_i1	nesprin-1 isoform x6	8.80604	2.4003e-07	1.33385e-05	1578	4	P:cytoskeleton organization; C:nuclear envelope; C:protein complex; F:cytoskeletal protein binding	-	IPR001715 (SMART); IPR001715 (G3DSA:1.10.418.GENE3D); IPR001715 (PFAM); IPR030265 (PTHR11915:PANTHER); PTHR11915 (PANTHER); IPR001589 (PROSITE_PATTERNS); IPR001715 (PROSITE_PROFILES); IPR001715 (SUPERFAMILY)
TR11954|c0_g2_i1	probable cleavage and polyadenylation specificity factor subunit 2-like	8.76175	2.97358e-07	1.63181e-05	2357	3	P:mRNA processing; C:nucleoplasm; C:protein complex	-	no IPS match
TR32912|c2_g2_i1	rna-directed dna polymerase from mobile element jockey-like	8.67144	5.01781e-10	5.71179e-08	1925	0	-		Coil (COILS); Coil (COILS); IPR000477 (PFAM); PTHR19446:SF371 (PANTHER); PTHR19446:SF371 (PANTHER); PTHR19446 (PANTHER); PTHR19446 (PANTHER); IPR000477 (PROSITE_PROFILES); SSF56672 (SUPERFAMILY)
TR28378|c0_g1_i2	PREDICTED: uncharacterized protein LOC105266860	8.62007	6.35441e-07	3.20322e-05	1120	0	-		TRANSMEMBRANE (PHOBIUS); CYTOPLASMIC_DOMAIN (PHOBIUS); NON_CYTOPLASMIC_DOMAIN (PHOBIUS); TMhelix (TMHMM)
TR28757|c12_g5_i1	ptb-associated splicing factor	8.57239	1.74104e-09	1.06479e-07	1482	1	F:molecular_function	-	IPR000504 (SMART); IPR000504 (PFAM); IPR012677 (G3DSA:3.30.70.GENE3D); IPR000504 (PROSITE_PROFILES); IPR012677 (SUPERFAMILY)
TR42234|c0_g1_i2	protein bark beetle isoform x2	8.54365	9.53889e-07	4.54982e-05	3147	0	-		IPR016186 (G3DSA:3.10.100.GENE3D); CYTOPLASMIC_DOMAIN (PHOBIUS); TRANSMEMBRANE (PHOBIUS); NON_CYTOPLASMIC_DOMAIN (PHOBIUS); IPR016187 (SUPERFAMILY); TMhelix (TMHMM)
TR43984|c1_g1_i1	hypothetical protein EAG_06621	8.50895	1.40322e-09	1.47058e-07	1597	0	-		PTHR23080 (PANTHER); PTHR23080:SF15 (PANTHER)
TR37814|c0_g1_i3	transmembrane protein 181	8.49036	1.33266e-06	6.02513e-05	697	0	-		PTHR31918 (PANTHER); PTHR31918:SF1 (PANTHER); NON_CYTOPLASMIC_DOMAIN (PHOBIUS); CYTOPLASMIC_DOMAIN (PHOBIUS); TRANSMEMBRANE (PHOBIUS); TMhelix (TMHMM)
TR39363|c0_g1_i1	clone 205-like isoform x1	8.49036	1.33266e-06	6.02513e-05	553	0	-		no IPS match
TR5198|c1_g2_i2	rna-directed dna polymerase from mobile element jockey-like	8.42114	4.9992e-10	5.67298e-08	1862	0	-		Coil (COILS); IPR000477 (PFAM); PTHR19446:SF244 (PANTHER); PTHR19446 (PANTHER); PTHR19446:SF244 (PANTHER); PTHR19446 (PANTHER); IPR000477 (PROSITE_PROFILES); SSF56672 (SUPERFAMILY); IPR005135 (SUPERFAMILY)
TR9098|c1_g1_i3	ddb1- and cul4-associated factor 7	8.40653	2.04881e-06	9.01387e-05	1792	1	F:molecular_function	-	IPR001680 (SMART); IPR001680 (PFAM); IPR015943 (G3DSA:2.130.10.GENE3D); PTHR19919 (PANTHER); IPR019775 (PROSITE_PATTERNS); IPR001680 (PROSITE_PROFILES); IPR017986 (PROSITE_PROFILES); IPR017986 (SUPERFAMILY)
TR3977|c8_g1_i8	cyclin-k-like isoform x1	8.39834	2.78299e-09	2.76502e-07	1366	6	C:nucleus; F:enzyme binding; P:cellular protein modification process; P:cell cycle; P:cellular nitrogen compound metabolic process; P:biosynthetic process	-	IPR013763 (SMART); IPR013763 (G3DSA:1.10.472.GENE3D); IPR004367 (PFAM); IPR006671 (PFAM); IPR015429 (PIRSF); PTHR10026:SF71 (PANTHER); PTHR10026 (PANTHER); IPR013763 (SUPERFAMILY); IPR013763 (SUPERFAMILY)
TR45093|c0_g1_i4	adamts-like protein 4 isoform x1	8.2578	1.28501e-09	1.37719e-07	3097	3	C:proteinaceous extracellular matrix; F:ion binding; F:peptidase activity	EC:3.4.24	IPR013273 (PRINTS); IPR000884 (SMART); IPR010294 (PFAM); IPR000884 (PFAM); G3DSA:2.20.100.10 (GENE3D); PTHR13723 (PANTHER); IPR000884 (PROSITE_PROFILES); IPR000884 (PROSITE_PROFILES); IPR000884 (PROSITE_PROFILES); IPR000884 (PROSITE_PROFILES); IPR000884 (PROSITE_PROFILES); IPR000884 (SUPERFAMILY); IPR000884 (SUPERFAMILY); IPR000884 (SUPERFAMILY); IPR000884 (SUPERFAMILY); IPR000884 (SUPERFAMILY)
TR25879|c0_g1_i1	pwwp domain-containing protein 2b-like	8.255	4.27844e-06	0.000173188	1294	0	-		no IPS match
TR33244|c7_g2_i1	nuclease harbi1 isoform x2	8.255	4.27844e-06	0.000173188	412	0	-		no IPS match
TR8453|c0_g1_i1	nuclease harbi1	8.24861	7.12126e-09	4.03748e-07	1106	0	-		IPR027806 (PFAM); PTHR22930 (PANTHER)
TR53228|c0_g1_i1	f-box only protein 39-like	8.22269	5.18875e-06	0.000203559	826	0	-		IPR032675 (G3DSA:3.80.10.GENE3D)
TR33211|c9_g4_i5	protein arginine n-methyltransferase 7	8.1558	7.0186e-06	0.000257459	4596	2	P:cellular protein modification process; F:methyltransferase activity	-	PF06325 (PFAM); IPR029063 (G3DSA:3.40.50.GENE3D); PTHR11006:SF4 (PANTHER); IPR025799 (PANTHER); IPR025799 (PROSITE_PROFILES); IPR029063 (SUPERFAMILY)
TR11460|c0_g1_i2	39s ribosomal protein mitochondrial	8.1558	7.0186e-06	0.000257459	636	0	-		TRANSMEMBRANE (PHOBIUS); NON_CYTOPLASMIC_DOMAIN (PHOBIUS); TRANSMEMBRANE (PHOBIUS); CYTOPLASMIC_DOMAIN (PHOBIUS); CYTOPLASMIC_DOMAIN (PHOBIUS); SignalP-noTM (SIGNALP_EUK)
TR55120|c0_g2_i1	tudor domain-containing protein 3 isoform x1	8.12116	8.59778e-06	0.000305491	284	0	-		no IPS match
TR33246|c6_g1_i1	sn1-specific diacylglycerol lipase alpha isoform x4	8.08567	9.4751e-06	0.00034097	433	0	-		IPR029058 (G3DSA:3.40.50.GENE3D); PTHR21493 (PANTHER); PTHR21493:SF102 (PANTHER); PTHR21493 (PANTHER); PTHR21493:SF102 (PANTHER)
TR44594|c0_g1_i1	hypothetical protein EAG_11855	8.01195	1.44592e-05	0.000488855	462	2	F:DNA binding; P:DNA metabolic process	-	IPR013762 (G3DSA:1.10.443.GENE3D); IPR002104 (PFAM); PTHR31660 (PANTHER); PTHR31660:SF76 (PANTHER); IPR011010 (SUPERFAMILY)
TR32912|c3_g1_i1	hypothetical protein SINV_03233	8.01195	1.44592e-05	0.000488855	479	0	-		no IPS match
TR16792|c0_g1_i1	reverse transcriptase homolog	7.97757	1.26299e-14	2.72897e-12	2887	4	P:RNA-dependent DNA replication; F:RNA-directed DNA polymerase activity; P:nucleic acid phosphodiester bond hydrolysis; F:endonuclease activity		IPR005135 (PFAM); IPR005135 (G3DSA:3.60.10.GENE3D); IPR000477 (PFAM); PTHR19446:SF352 (PANTHER); PTHR19446 (PANTHER); IPR000477 (PROSITE_PROFILES); SSF56672 (SUPERFAMILY); IPR005135 (SUPERFAMILY)
TR3974|c0_g3_i1	coiled-coil domain-containing protein 112-like	7.97362	1.79859e-05	0.000583402	485	0	-		no IPS match
TR46137|c0_g2_i1	PREDICTED: uncharacterized protein LOC105273744	7.96127	6.12488e-05	0.0010389	2538	0	-		IPR009667 (PFAM); IPR004242 (PFAM); PTHR33053 (PANTHER); CYTOPLASMIC_DOMAIN (PHOBIUS); TRANSMEMBRANE (PHOBIUS); NON_CYTOPLASMIC_DOMAIN (PHOBIUS); TMhelix (TMHMM)
TR18853|c0_g1_i2	zinc transporter zip9	7.93425	2.02341e-05	0.00062532	900	4	P:transport; C:cellular_component; F:transmembrane transporter activity; P:transmembrane transport	-	IPR003689 (PFAM); PTHR16133:SF0 (PANTHER); PTHR16133 (PANTHER); NON_CYTOPLASMIC_DOMAIN (PHOBIUS); TRANSMEMBRANE (PHOBIUS); TRANSMEMBRANE (PHOBIUS); NON_CYTOPLASMIC_DOMAIN (PHOBIUS); NON_CYTOPLASMIC_DOMAIN (PHOBIUS); TRANSMEMBRANE (PHOBIUS); TRANSMEMBRANE (PHOBIUS); CYTOPLASMIC_DOMAIN (PHOBIUS); CYTOPLASMIC_DOMAIN (PHOBIUS); NON_CYTOPLASMIC_DOMAIN (PHOBIUS); TRANSMEMBRANE (PHOBIUS); CYTOPLASMIC_DO…
TR31580|c4_g1_i8	antichymotrypsin-2-like isoform x3	7.89378	2.53647e-05	0.000757377	278	1	C:extracellular space	-	IPR023796 (PFAM); G3DSA:3.30.497.10 (GENE3D); IPR000215 (PANTHER); IPR023796 (SUPERFAMILY)
TR39180|c1_g1_i3	PREDICTED: uncharacterized protein LOC105264397	7.89378	2.53647e-05	0.000757377	1015	0	-		NON_CYTOPLASMIC_DOMAIN (PHOBIUS); TRANSMEMBRANE (PHOBIUS); CYTOPLASMIC_DOMAIN (PHOBIUS); TMhelix (TMHMM)
TR49645|c0_g3_i1	tata-box-binding protein	7.76507	4.53239e-05	0.00127446	923	3	P:cellular nitrogen compound metabolic process; P:biosynthetic process; F:DNA binding	-	IPR000814 (PRINTS); IPR012295 (G3DSA:3.30.310.GENE3D); IPR000814 (PFAM); IPR000814 (PANTHER); SSF55945 (SUPERFAMILY); SSF55945 (SUPERFAMILY)
TR32824|c9_g1_i2	ankyrin repeat and death domain-containing protein 1a-like	7.76507	4.53239e-05	0.00127446	989	1	F:molecular_function	-	IPR002110 (PRINTS); IPR002110 (SMART); IPR020683 (G3DSA:1.25.40.GENE3D); IPR020683 (PFAM); IPR020683 (G3DSA:1.25.40.GENE3D); PTHR24198 (PANTHER); IPR002110 (PROSITE_PROFILES); IPR002110 (PROSITE_PROFILES); IPR020683 (PROSITE_PROFILES); IPR002110 (PROSITE_PROFILES); IPR002110 (PROSITE_PROFILES); IPR002110 (PROSITE_PROFILES); IPR020683 (SUPERFAMILY)
TR19448|c0_g1_i1	zinc finger protein 84	7.76507	4.53239e-05	0.00127446	406	0	-		no IPS match
TR19490|c0_g1_i4	pol polyprotein	7.74522	1.41348e-08	1.22709e-06	1635	2	P:DNA metabolic process; F:molecular_function	-	IPR001584 (PFAM); IPR012337 (G3DSA:3.30.420.GENE3D); PTHR24559:SF201 (PANTHER); PTHR24559 (PANTHER); IPR001584 (PROSITE_PROFILES); IPR012337 (SUPERFAMILY)
TR45104|c0_g2_i9	protein daughterless isoform x9	7.72258	1.29854e-06	7.0454e-05	2291	1	F:molecular_function	-	IPR011598 (SMART); IPR011598 (G3DSA:4.10.280.GENE3D); IPR011598 (PFAM); PTHR11793:SF13 (PANTHER); PTHR11793 (PANTHER); IPR011598 (PROSITE_PROFILES); IPR011598 (SUPERFAMILY)
TR50219|c1_g1_i1	hypothetical protein RF55_16728, partial	7.71948	5.79138e-05	0.00157374	383	2	F:nuclease activity; F:DNA binding	EC:3.1	IPR019080 (PFAM); IPR011604 (G3DSA:3.90.320.GENE3D); IPR011335 (SUPERFAMILY)
TR53465|c0_g1_i1	hypothetical protein RF55_12641	7.71948	5.79138e-05	0.00157374	460	0	-		no IPS match
TR3998|c1_g1_i7	rho gtpase-activating protein 100f isoform x1	7.71062	2.43377e-05	0.000481459	2261	1	F:molecular_function	-	IPR001478 (SMART); IPR001478 (G3DSA:2.30.42.GENE3D); IPR001478 (PFAM); PTHR14102 (PANTHER); PTHR14102:SF7 (PANTHER); IPR001478 (PROSITE_PROFILES); IPR001478 (SUPERFAMILY)
TR5853|c0_g3_i1	longitudinals lacking isoform g-like isoform x1	7.6724	6.61872e-05	0.00170349	523	2	F:molecular_function; F:ion binding	-	IPR015880 (SMART); IPR013087 (G3DSA:3.30.160.GENE3D); IPR007087 (PROSITE_PROFILES); IPR007087 (PROSITE_PROFILES); SSF57667 (SUPERFAMILY)
TR32864|c5_g1_i4	ankyrin repeat and protein kinase domain-containing protein 1-like	7.6724	6.61872e-05	0.00170349	890	1	F:molecular_function	-	IPR002110 (SMART); IPR020683 (PFAM); IPR020683 (G3DSA:1.25.40.GENE3D); IPR002110 (PFAM); PTHR24198 (PANTHER); IPR002110 (PROSITE_PROFILES); IPR002110 (PROSITE_PROFILES); IPR020683 (PROSITE_PROFILES); IPR002110 (PROSITE_PROFILES); IPR020683 (SUPERFAMILY)
TR31615|c7_g1_i1	ubiquitin carboxyl-terminal hydrolase 17-like partial	7.62695	1.85048e-12	2.35953e-10	1149	6	F:hydrolase activity; ; P:ubiquitin-dependent protein catabolic process; F:helicase activity; F:ATP binding; P:metabolic process		no IPS match
TR46958|c0_g1_i1	general odorant-binding protein 56d-like	7.62373	8.54107e-05	0.00210129	387	1	F:molecular_function	-	IPR006170 (G3DSA:1.10.238.GENE3D); IPR006170 (PFAM); IPR006170 (SUPERFAMILY)
TR1854|c1_g1_i1	zinc finger protein 423	7.62373	8.54107e-05	0.00210129	463	1	F:ion binding	-	no IPS match
TR41866|c0_g1_i9	PREDICTED: uncharacterized protein LOC103573290 isoform X1	7.62373	8.54107e-05	0.00210129	547	0	-		TMhelix (TMHMM); TMhelix (TMHMM); TMhelix (TMHMM)
TR1515|c1_g1_i13	pol polyprotein	7.6186	6.17714e-08	4.83103e-06	898	0	-		no IPS match
TR8643|c0_g1_i1	bloom syndrome protein homolog	7.52118	0.000125561	0.00300202	337	0	-		IPR027417 (G3DSA:3.40.50.GENE3D); PTHR13710:SF70 (PANTHER); PTHR13710 (PANTHER); IPR027417 (SUPERFAMILY)
TR49069|c5_g1_i3	battenin isoform x2	7.51584	5.02496e-07	1.80542e-05	515	1	C:cellular_component	-	CYTOPLASMIC_DOMAIN (PHOBIUS); NON_CYTOPLASMIC_DOMAIN (PHOBIUS); TRANSMEMBRANE (PHOBIUS); TMhelix (TMHMM)
TR45475|c0_g2_i2	ras-related protein m-ras-like	7.50182	1.25895e-07	9.03236e-06	801	5	F:ion binding; C:intracellular; C:cellular_component; P:signal transduction; P:transport	-	PR00449 (PRINTS); SM00175 (SMART); SM00174 (SMART); SM00173 (SMART); IPR027417 (G3DSA:3.40.50.GENE3D); IPR001806 (PFAM); IPR005225 (TIGRFAM); PTHR24070:SF268 (PANTHER); IPR020849 (PANTHER); IPR020849 (PROSITE_PROFILES); IPR027417 (SUPERFAMILY)
TR42244|c0_g1_i1	probable tyrosyl-dna phosphodiesterase	7.46704	0.000164799	0.00379074	2217	4	C:nucleus; P:response to stress; P:DNA metabolic process; F:molecular_function	-	IPR027415 (G3DSA:3.30.870.GENE3D); G3DSA:3.30.870.10 (GENE3D); IPR010347 (PFAM); PTHR12415:SF0 (PANTHER); IPR010347 (PANTHER); SSF56024 (SUPERFAMILY); SSF56024 (SUPERFAMILY)
TR28530|c0_g1_i1	PREDICTED: uncharacterized protein LOC105702317	7.46704	0.000164799	0.00379074	343	0	-		no IPS match
TR39735|c0_g1_i1	PREDICTED: uncharacterized protein LOC103574271, partial	7.44907	8.82689e-12	8.51833e-10	2703	1	F:ion binding	-	PTHR31912 (PANTHER); PTHR31912:SF16 (PANTHER); IPR007087 (PROSITE_PATTERNS); IPR007087 (PROSITE_PROFILES)
TR53798|c1_g1_i3	rna pseudouridylate synthase domain-containing protein 2-like	7.41078	0.00021796	0.00480086	1228	3	P:cellular nitrogen compound metabolic process; F:RNA binding; F:isomerase activity	EC:5.4.99.12	IPR006145 (PFAM); IPR006225 (TIGRFAM); PTHR11079:SF85 (PANTHER); PTHR11079 (PANTHER); IPR006224 (PROSITE_PATTERNS); IPR020103 (SUPERFAMILY)
TR45167|c1_g2_i2	kielin chordin-like protein isoform x2	7.41078	0.00021796	0.00480086	1367	1	F:molecular_function	-	IPR000742 (SMART); G3DSA:2.10.25.10 (GENE3D); IPR001846 (PFAM); PTHR11339:SF285 (PANTHER); PTHR11339 (PANTHER); PTHR11339 (PANTHER); PTHR11339:SF285 (PANTHER); IPR013032 (PROSITE_PATTERNS); IPR000742 (PROSITE_PROFILES); IPR001846 (PROSITE_PROFILES); SSF57196 (SUPERFAMILY)
TR38599|c2_g1_i5	casein kinase i isoform gamma-3 isoform x3	7.35224	0.000290613	0.00606848	648	4	P:cellular protein modification process; F:ion binding; F:kinase activity; P:cellular amino acid metabolic process	EC:2.7.11	CYTOPLASMIC_DOMAIN (PHOBIUS); TRANSMEMBRANE (PHOBIUS); NON_CYTOPLASMIC_DOMAIN (PHOBIUS); CYTOPLASMIC_DOMAIN (PHOBIUS); TRANSMEMBRANE (PHOBIUS); TMhelix (TMHMM); TMhelix (TMHMM)
TR27515|c1_g2_i4	protein scribble homolog isoform x4	7.35224	0.000290613	0.00606848	406	0	-		no IPS match
TR5690|c0_g1_i1	protein pellino	7.35224	0.000290613	0.00606848	250	0	-		no IPS match
TR8340|c0_g1_i5	protein daple-like isoform x3	7.32017	4.97038e-05	0.00159512	1245	0	-		TRANSMEMBRANE (PHOBIUS); CYTOPLASMIC_DOMAIN (PHOBIUS); NON_CYTOPLASMIC_DOMAIN (PHOBIUS); TMhelix (TMHMM)
TR9014|c11_g1_i2	fit family protein cg10671-like	7.21213	7.5254e-06	0.000322607	889	2	C:endoplasmic reticulum; P:biological_process	-	IPR019388 (PFAM); PTHR23129:SF0 (PANTHER); IPR019388 (PANTHER); TRANSMEMBRANE (PHOBIUS); CYTOPLASMIC_DOMAIN (PHOBIUS); TRANSMEMBRANE (PHOBIUS); NON_CYTOPLASMIC_DOMAIN (PHOBIUS); CYTOPLASMIC_DOMAIN (PHOBIUS); NON_CYTOPLASMIC_DOMAIN (PHOBIUS); NON_CYTOPLASMIC_DOMAIN (PHOBIUS); TRANSMEMBRANE (PHOBIUS); CYTOPLASMIC_DOMAIN (PHOBIUS); TRANSMEMBRANE (PHOBIUS); TRANSMEMBRANE (PHOBIUS); TMhelix (TMHMM); T…
TR30823|c0_g1_i17	zinc finger protein 853 isoform x11	7.16934	0.000143418	0.00402157	1738	2	F:molecular_function; F:ion binding	-	Coil (COILS); Coil (COILS); Coil (COILS); Coil (COILS); IPR015880 (SMART); IPR013087 (G3DSA:3.30.160.GENE3D); IPR013087 (G3DSA:3.30.160.GENE3D); IPR013087 (G3DSA:3.30.160.GENE3D); PF12874 (PFAM); IPR007087 (PFAM); IPR007087 (PFAM); IPR013087 (G3DSA:3.30.160.GENE3D); PTHR24409 (PANTHER); IPR007087 (PROSITE_PATTERNS); IPR007087 (PROSITE_PATTERNS); IPR007087 (PROSITE_PATTERNS); IPR007087 (PROSITE_PA…
TR33244|c3_g1_i1	3-hydroxyisobutyryl- mitochondrial-like	7.05163	5.7583e-06	0.000258721	648	1	F:lyase activity	-	IPR029045 (G3DSA:3.90.226.GENE3D); IPR032259 (PFAM); PTHR11941 (PANTHER); PTHR11941:SF53 (PANTHER); IPR029045 (SUPERFAMILY)
TR31615|c1_g1_i1	PREDICTED: uncharacterized protein LOC103511594	7.03707	4.26581e-14	6.90366e-12	3742	7	P:homeostatic process; P:chromosome organization; P:DNA metabolic process; F:helicase activity; P:response to stress; F:ion binding; C:chromosome	-	Coil (COILS); Coil (COILS); IPR010285 (PFAM); IPR027417 (G3DSA:3.40.50.GENE3D); IPR025476 (PFAM); IPR003840 (PANTHER); PTHR23274:SF14 (PANTHER); IPR027417 (SUPERFAMILY)
TR45104|c0_g2_i2	transcription factor 12 isoform x14	6.95874	8.82148e-06	0.000370378	2241	1	F:molecular_function	-	IPR011598 (SMART); IPR011598 (G3DSA:4.10.280.GENE3D); IPR011598 (PFAM); PTHR11793 (PANTHER); PTHR11793:SF13 (PANTHER); IPR011598 (PROSITE_PROFILES); IPR011598 (SUPERFAMILY)
TR48971|c4_g2_i1	protein kinase brain isozyme isoform x2	6.93295	7.43099e-05	0.00121305	716	1	P:signal transduction	-	IPR020454 (PRINTS); IPR002219 (PFAM); G3DSA:3.30.60.20 (GENE3D); PTHR24356 (PANTHER); PTHR24356:SF201 (PANTHER); IPR002219 (PROSITE_PROFILES); SSF57889 (SUPERFAMILY)
TR19531|c1_g1_i1	fact complex subunit spt16 isoform x2	6.83411	1.33763e-05	0.000520718	3642	0	-		Coil (COILS); Coil (COILS); IPR000994 (PFAM); IPR029149 (G3DSA:3.40.350.GENE3D); IPR013953 (PFAM); IPR000994 (G3DSA:3.90.230.GENE3D); IPR013719 (PFAM); IPR029148 (PFAM); PTHR13980 (PANTHER); IPR000994 (SUPERFAMILY)
TR23641|c0_g2_i1	PREDICTED: uncharacterized protein LOC105832528 isoform X1	6.80603	1.10784e-13	1.83265e-11	1459	0	-		no IPS match
TR3986|c0_g1_i6	PREDICTED: uncharacterized protein LOC107042731	6.78497	0.000113024	0.00328147	1126	0	-		CYTOPLASMIC_DOMAIN (PHOBIUS); NON_CYTOPLASMIC_DOMAIN (PHOBIUS); TRANSMEMBRANE (PHOBIUS); TMhelix (TMHMM)
TR45093|c0_g1_i5	adamts-like protein 4 isoform x1	6.78024	2.17396e-05	0.000805594	824	0	-		no IPS match
TR12021|c0_g1_i1	dynein heavy chain axonemal-like	6.69706	6.76183e-06	0.00029732	939	0	-		Coil (COILS)
TR31582|c2_g1_i4	dna-directed rna polymerase ii subunit rpb2	6.68332	1.10829e-05	0.000257336	3422	7	F:nucleotidyltransferase activity; F:DNA binding; P:cellular nitrogen compound metabolic process; P:biosynthetic process; F:molecular_function; C:nucleolus; P:small molecule metabolic process	EC:2.7.7.6	G3DSA:3.90.1100.10 (GENE3D); IPR007120 (PFAM); IPR007647 (PFAM); IPR007644 (PFAM); IPR007645 (PFAM); IPR007642 (G3DSA:3.90.1110.GENE3D); IPR007120 (G3DSA:2.40.270.GENE3D); IPR007646 (PFAM); IPR014724 (G3DSA:2.40.50.GENE3D); IPR007642 (PFAM); PTHR20856:SF7 (PANTHER); IPR015712 (PANTHER); IPR007121 (PROSITE_PATTERNS); SSF64484 (SUPERFAMILY)
TR7305|c0_g2_i1	circadian locomoter output cycles protein kaput	6.55735	9.04217e-05	0.00140856	698	0	-		Coil (COILS)
TR38599|c2_g1_i3	casein kinase i isoform gamma-3 isoform x8	6.38876	2.89837e-05	0.00101681	334	0	-		no IPS match
TR7787|c0_g2_i1	transcription factor ken 1-like protein	6.30352	4.35348e-05	0.00143309	527	1	F:molecular_function	-	G3DSA:3.30.710.10 (GENE3D); IPR000210 (PFAM); IPR000210 (PROSITE_PROFILES); IPR011333 (SUPERFAMILY)
TR5938|c0_g1_i1	vascular endothelial growth factor receptor 1-like	6.24855	6.45675e-05	0.00109035	306	3	P:cellular protein modification process; F:kinase activity; F:ion binding	EC:2.7.10	IPR001245 (PRINTS); IPR020635 (SMART); G3DSA:1.10.510.10 (GENE3D); IPR001245 (PFAM); PTHR24416 (PANTHER); PTHR24416:SF358 (PANTHER); IPR008266 (PROSITE_PATTERNS); IPR000719 (PROSITE_PROFILES); IPR011009 (SUPERFAMILY)
TR47030|c2_g1_i3	mitochondrial sodium hydrogen exchanger 9b2 isoform x3	6.14193	0.000147466	0.00407524	1192	5	C:cellular_component; P:transport; P:transmembrane transport; F:transmembrane transporter activity; P:homeostatic process	-	IPR006153 (PFAM); PTHR31102:SF1 (PANTHER); PTHR31102 (PANTHER); TRANSMEMBRANE (PHOBIUS); SIGNAL_PEPTIDE (PHOBIUS); CYTOPLASMIC_DOMAIN (PHOBIUS); NON_CYTOPLASMIC_DOMAIN (PHOBIUS); TRANSMEMBRANE (PHOBIUS); CYTOPLASMIC_DOMAIN (PHOBIUS); SIGNAL_PEPTIDE_H_REGION (PHOBIUS); TRANSMEMBRANE (PHOBIUS); TRANSMEMBRANE (PHOBIUS); NON_CYTOPLASMIC_DOMAIN (PHOBIUS); NON_CYTOPLASMIC_DOMAIN (PHOBIUS); CYTOPLASMIC_…
TR31654|c4_g1_i2	ankyrin repeat protein	6.05833	0.000147408	0.00406454	473	1	F:molecular_function	-	IPR002110 (PRINTS); IPR002110 (SMART); IPR020683 (G3DSA:1.25.40.GENE3D); IPR020683 (PFAM); PTHR24198 (PANTHER); IPR002110 (PROSITE_PROFILES); IPR020683 (PROSITE_PROFILES); IPR002110 (PROSITE_PROFILES); IPR020683 (SUPERFAMILY)
TR40048|c1_g1_i1	nadph--cytochrome p450 reductase isoform x1	5.99315	0.00039923	0.00461785	345	0	-		G3DSA:3.40.50.80 (GENE3D); PTHR19384 (PANTHER); SSF52343 (SUPERFAMILY)
TR53727|c8_g1_i8	rb1-inducible coiled-coil protein 1 isoform x2	5.95264	1.15154e-10	1.47012e-08	2667	0	-		Coil (COILS); Coil (COILS); Coil (COILS); Coil (COILS); G3DSA:3.10.20.90 (GENE3D); PTHR13222 (PANTHER); PTHR13222:SF1 (PANTHER); PTHR13222:SF1 (PANTHER); PTHR13222 (PANTHER)
TR40412|c2_g1_i1	PREDICTED: uncharacterized protein LOC106693197	5.81069	1.53887e-08	7.77379e-07	1702	0	-		TRANSMEMBRANE (PHOBIUS); CYTOPLASMIC_DOMAIN (PHOBIUS); TRANSMEMBRANE (PHOBIUS); CYTOPLASMIC_DOMAIN (PHOBIUS); NON_CYTOPLASMIC_DOMAIN (PHOBIUS); NON_CYTOPLASMIC_DOMAIN (PHOBIUS); NON_CYTOPLASMIC_DOMAIN (PHOBIUS); TRANSMEMBRANE (PHOBIUS); TRANSMEMBRANE (PHOBIUS); TMhelix (TMHMM); TMhelix (TMHMM)
TR39701|c8_g1_i1	map kinase-interacting serine threonine-protein kinase 1 isoform x1	5.44215	2.43435e-09	2.44309e-07	1797	3	F:kinase activity; F:ion binding; P:cellular protein modification process	-	Coil (COILS); IPR000719 (SMART); G3DSA:1.10.510.10 (GENE3D); G3DSA:3.30.200.20 (GENE3D); IPR000719 (PFAM); PTHR24349 (PANTHER); PTHR24349:SF78 (PANTHER); IPR008271 (PROSITE_PATTERNS); IPR017441 (PROSITE_PATTERNS); IPR000719 (PROSITE_PROFILES); IPR011009 (SUPERFAMILY)
TR24664|c5_g2_i2	rna-directed dna polymerase from mobile element jockey-like	4.92606	5.43955e-10	5.91671e-08	4468	0	-		IPR005135 (PFAM); IPR000477 (PFAM); G3DSA:3.30.70.270 (GENE3D); IPR005135 (G3DSA:3.60.10.GENE3D); PTHR19446 (PANTHER); IPR000477 (PROSITE_PROFILES); SSF56672 (SUPERFAMILY); IPR005135 (SUPERFAMILY)
TR31672|c2_g2_i2	muscle m-line assembly protein unc-89-like isoform x7	4.92349	5.14087e-08	4.07577e-06	2951	1	F:molecular_function	-	Coil (COILS); IPR003599 (SMART); IPR003598 (SMART); IPR013783 (G3DSA:2.60.40.GENE3D); IPR013783 (G3DSA:2.60.40.GENE3D); IPR013783 (G3DSA:2.60.40.GENE3D); IPR013098 (PFAM); IPR013783 (G3DSA:2.60.40.GENE3D); PTHR10489:SF642 (PANTHER); PTHR10489:SF642 (PANTHER); PTHR10489 (PANTHER); IPR007110 (PROSITE_PROFILES); IPR007110 (PROSITE_PROFILES); IPR007110 (PROSITE_PROFILES); IPR007110 (PROSITE_PROFILES)…
TR6205|c0_g1_i1	collagen alpha-1 chain	4.77251	5.6152e-06	0.000252811	271	0	-		SIGNAL_PEPTIDE_N_REGION (PHOBIUS); SIGNAL_PEPTIDE_C_REGION (PHOBIUS); NON_CYTOPLASMIC_DOMAIN (PHOBIUS); SIGNAL_PEPTIDE_H_REGION (PHOBIUS); SIGNAL_PEPTIDE (PHOBIUS)
TR52610|c0_g1_i6	sodium hydrogen exchanger 7 isoform x5	4.65514	7.38525e-07	4.2884e-05	2495	5	P:transport; C:cellular_component; F:transmembrane transporter activity; P:homeostatic process; P:transmembrane transport	-	IPR002090 (PRINTS); IPR004709 (PRINTS); IPR004709 (TIGRFAM); IPR006153 (PFAM); PTHR10110:SF94 (PANTHER); PTHR10110:SF94 (PANTHER); IPR018422 (PANTHER); IPR018422 (PANTHER); CYTOPLASMIC_DOMAIN (PHOBIUS); NON_CYTOPLASMIC_DOMAIN (PHOBIUS); CYTOPLASMIC_DOMAIN (PHOBIUS); CYTOPLASMIC_DOMAIN (PHOBIUS); TRANSMEMBRANE (PHOBIUS); TRANSMEMBRANE (PHOBIUS); CYTOPLASMIC_DOMAIN (PHOBIUS); TRANSMEMBRANE (PHOBIUS…
TR19324|c0_g1_i2	aquaporin isoform x1	4.56372	9.43197e-06	0.00022452	1122	3	P:transport; F:molecular_function; C:cellular_component	-	IPR000425 (PRINTS); IPR000425 (PFAM); IPR023271 (G3DSA:1.20.1080.GENE3D); IPR000425 (TIGRFAM); IPR000425 (PANTHER); IPR022357 (PROSITE_PATTERNS); TRANSMEMBRANE (PHOBIUS); NON_CYTOPLASMIC_DOMAIN (PHOBIUS); TRANSMEMBRANE (PHOBIUS); NON_CYTOPLASMIC_DOMAIN (PHOBIUS); CYTOPLASMIC_DOMAIN (PHOBIUS); CYTOPLASMIC_DOMAIN (PHOBIUS); CYTOPLASMIC_DOMAIN (PHOBIUS); NON_CYTOPLASMIC_DOMAIN (PHOBIUS); TRANSMEMBRA…
TR53246|c1_g3_i1	protein fam214a	4.56247	4.48452e-08	2.7402e-06	362	0	-		no IPS match
TR36252|c1_g1_i1	mediator of rna polymerase ii transcription subunit 25-like isoform x7	4.55288	5.16022e-05	0.00165354	377	0	-		Coil (COILS)
TR32715|c7_g3_i1	headcase protein isoform x2	4.53758	3.29885e-05	0.00113867	1118	0	-		IPR031947 (PFAM); PTHR13425:SF3 (PANTHER); IPR026066 (PANTHER)
TR18979|c0_g1_i1	transposase-like protein	4.34195	1.49962e-06	7.39067e-05	1183	6	F:nucleic acid binding; F:transposase activity; P:DNA integration; P:transposition, DNA-mediated; F:protein dimerization activity; F:DNA binding		no IPS match
TR27560|c2_g1_i1	tubulin-specific chaperone d	4.22345	0.000423303	0.00485014	506	0	-		no IPS match
TR13038|c0_g3_i2	excitatory amino acid transporter isoform x2	4.12903	8.16314e-05	0.00248211	2707	3	P:transport; C:cellular_component; F:transmembrane transporter activity	-	IPR001991 (PRINTS); IPR001991 (G3DSA:1.10.3860.GENE3D); IPR001991 (PFAM); PTHR11958:SF63 (PANTHER); IPR001991 (PANTHER); IPR018107 (PROSITE_PATTERNS); NON_CYTOPLASMIC_DOMAIN (PHOBIUS); TRANSMEMBRANE (PHOBIUS); TRANSMEMBRANE (PHOBIUS); TRANSMEMBRANE (PHOBIUS); NON_CYTOPLASMIC_DOMAIN (PHOBIUS); CYTOPLASMIC_DOMAIN (PHOBIUS); NON_CYTOPLASMIC_DOMAIN (PHOBIUS); TRANSMEMBRANE (PHOBIUS); NON_CYTOPLASMIC_…
TR11962|c0_g1_i2	hypothetical protein SINV_08163	4.12292	3.18534e-05	0.00110167	289	0	-		no IPS match
TR32865|c2_g1_i1	apoptosis-resistant e3 ubiquitin protein ligase 1 isoform x1	4.11155	6.03122e-08	4.18624e-06	3220	2	F:molecular_function; P:cellular protein modification process	EC:6.3.2.19	IPR000569 (SMART); IPR000569 (PFAM); G3DSA:3.30.2160.10 (GENE3D); IPR013783 (G3DSA:2.60.40.GENE3D); IPR017868 (PFAM); PTHR11254 (PANTHER); PTHR11254:SF340 (PANTHER); SIGNAL_PEPTIDE_C_REGION (PHOBIUS); SIGNAL_PEPTIDE_H_REGION (PHOBIUS); SIGNAL_PEPTIDE_N_REGION (PHOBIUS); SIGNAL_PEPTIDE (PHOBIUS); NON_CYTOPLASMIC_DOMAIN (PHOBIUS); IPR000569 (PROSITE_PROFILES); IPR014756 (SUPERFAMILY); IPR000569 (SU…
TR45376|c0_g2_i1	tyrosine-protein phosphatase 99a isoform x1	4.0972	0.000107517	0.00164975	771	1	F:molecular_function	-	IPR003599 (SMART); IPR013783 (G3DSA:2.60.40.GENE3D); PF13927 (PFAM); IPR007110 (PROSITE_PROFILES); SignalP-noTM (SIGNALP_EUK); IPR007110 (SUPERFAMILY)
TR27529|c12_g2_i3	5 -amp-activated protein kinase subunit gamma-2	4.09548	8.70296e-07	5.01707e-05	1287	2	F:kinase activity; P:biological_process	-	IPR000644 (SMART); IPR000644 (PFAM); G3DSA:3.10.580.10 (GENE3D); PTHR13780 (PANTHER); PTHR13780:SF26 (PANTHER); IPR000644 (PROSITE_PROFILES); IPR000644 (PROSITE_PROFILES); IPR000644 (PROSITE_PROFILES); IPR000644 (PROSITE_PROFILES); SSF54631 (SUPERFAMILY); SSF54631 (SUPERFAMILY)
TR25979|c0_g1_i1	dynein heavy chain axonemal	3.81008	3.32449e-05	0.000640327	1434	6	P:biological_process; C:cytoskeleton; C:protein complex; F:ATPase activity; F:ion binding; F:molecular_function	EC:3.6.1.3	IPR004273 (PFAM); IPR026983 (PANTHER); PTHR10676:SF280 (PANTHER)
TR3506|c0_g1_i3	ovochymase 2	3.77133	2.61567e-05	0.000943953	788	1	F:molecular_function	-	G3DSA:2.40.10.10 (GENE3D); IPR009003 (SUPERFAMILY)
TR5184|c1_g3_i1	protein o- case isoform x2	3.76128	8.64521e-06	0.000361294	3355	0	-		Coil (COILS); IPR016181 (G3DSA:3.40.630.GENE3D); IPR011496 (PFAM); PTHR13170:SF20 (PANTHER); PTHR13170:SF20 (PANTHER); PTHR13170 (PANTHER); PTHR13170 (PANTHER); IPR016181 (SUPERFAMILY); IPR017853 (SUPERFAMILY)
TR9091|c19_g1_i3	histone acetyltransferase kat6b isoform x2	3.7572	2.16362e-06	0.000111127	2295	12	F:molecular_function; F:ion binding; P:cellular nitrogen compound metabolic process; P:biosynthetic process; F:transferase activity, transferring acyl groups; C:chromosome; C:protein complex; C:nucleus; F:DNA binding; P:chromosome organization; P:DNA metabolic process; P:protein complex assembly	-	IPR001965 (SMART); IPR002717 (PFAM); IPR013083 (G3DSA:3.30.40.GENE3D); IPR019787 (PFAM); IPR011991 (G3DSA:1.10.10.GENE3D); IPR013083 (G3DSA:3.30.40.GENE3D); G3DSA:3.30.60.60 (GENE3D); IPR016181 (G3DSA:3.40.630.GENE3D); PTHR10615:SF35 (PANTHER); PTHR10615 (PANTHER); PTHR10615 (PANTHER); PTHR10615:SF35 (PANTHER); IPR019786 (PROSITE_PATTERNS); IPR002717 (PROSITE_PROFILES); IPR005818 (PROSITE_PROFILE…
TR1501|c5_g1_i1	dc-stamp domain-containing protein 1-like	3.70248	5.96507e-05	0.00105308	483	0	-		PTHR21041:SF4 (PANTHER); PTHR21041 (PANTHER); NON_CYTOPLASMIC_DOMAIN (PHOBIUS); TRANSMEMBRANE (PHOBIUS); CYTOPLASMIC_DOMAIN (PHOBIUS); NON_CYTOPLASMIC_DOMAIN (PHOBIUS); CYTOPLASMIC_DOMAIN (PHOBIUS); TRANSMEMBRANE (PHOBIUS); TRANSMEMBRANE (PHOBIUS); TMhelix (TMHMM); TMhelix (TMHMM); TMhelix (TMHMM)
TR1502|c6_g2_i2	1-phosphatidylinositol -bisphosphate phosphodiesterase epsilon-1-like	3.67292	2.03244e-05	0.000760543	3777	9	F:molecular_function; P:small molecule metabolic process; P:nucleobase-containing compound catabolic process; F:signal transducer activity; C:intracellular; P:signal transduction; P:catabolic process; P:lipid metabolic process	EC:3.1.4.11	no IPS match
TR41870|c0_g1_i6	PREDICTED: uncharacterized protein LOC105203160	3.66047	1.60716e-06	6.36842e-05	1806	1	F:molecular_function	-	IPR012337 (SUPERFAMILY)
TR6193|c0_g1_i1	hypothetical protein X777_06915	3.50978	9.32548e-05	0.00175777	557	0	-		PTHR23022 (PANTHER); PTHR23022:SF10 (PANTHER); CYTOPLASMIC_DOMAIN (PHOBIUS); NON_CYTOPLASMIC_DOMAIN (PHOBIUS); TRANSMEMBRANE (PHOBIUS)
TR52028|c0_g1_i1	PREDICTED: uncharacterized protein LOC105555675	3.45043	6.91319e-06	0.000226205	3032	0	-		PTHR33053 (PANTHER); PTHR33053:SF8 (PANTHER)
TR1530|c5_g1_i2	dynamin and dynamin central region and pleckstrin homology and dynamin gtpase effector domain containing protein	3.35763	4.11198e-06	0.000167107	2666	2	F:ion binding; F:GTPase activity	-	IPR003130 (PFAM); IPR000375 (PFAM); IPR022812 (PANTHER); PTHR11566:SF54 (PANTHER); IPR020850 (PROSITE_PROFILES)
TR42288|c3_g4_i1	plasma membrane calcium-transporting atpase 2 isoform x4	3.30942	3.09125e-05	0.00086772	233	5	F:calcium-transporting ATPase activity; P:calcium ion transmembrane transport; C:integral to membrane; F:metal ion binding; F:ATP binding	EC:3.6.3.8	SIGNAL_PEPTIDE_H_REGION (PHOBIUS); SIGNAL_PEPTIDE (PHOBIUS); SIGNAL_PEPTIDE_N_REGION (PHOBIUS); NON_CYTOPLASMIC_DOMAIN (PHOBIUS); SIGNAL_PEPTIDE_C_REGION (PHOBIUS); TMhelix (TMHMM)
TR535|c2_g1_i2	intersectin-2 isoform x5	3.27394	6.19945e-05	0.001935	1788	0	-		CYTOPLASMIC_DOMAIN (PHOBIUS); NON_CYTOPLASMIC_DOMAIN (PHOBIUS); TRANSMEMBRANE (PHOBIUS); TMhelix (TMHMM)
TR6771|c0_g1_i1	transposase-like protein	3.2615	5.76756e-05	0.00131698	766	3	P:DNA metabolic process; P:transposition; F:DNA binding	-	IPR002492 (PFAM)
TR52842|c10_g3_i1	protein alan shepard isoform x1	3.19116	3.6559e-05	0.00112738	608	1	F:molecular_function	-	IPR000504 (SMART); IPR012677 (G3DSA:3.30.70.GENE3D); IPR000504 (PFAM); PTHR24012 (PANTHER); PTHR24012:SF398 (PANTHER); PTHR24012 (PANTHER); PTHR24012:SF398 (PANTHER); IPR000504 (PROSITE_PROFILES); IPR012677 (SUPERFAMILY)
TR37911|c0_g2_i6	focal adhesion kinase 1 isoform x3	3.17173	8.64423e-05	0.00236371	1237	1	C:cytoskeleton	-	IPR019749 (SMART); IPR014352 (G3DSA:1.20.80.GENE3D); IPR019748 (PFAM); PTHR24418:SF273 (PANTHER); PTHR24418 (PANTHER); NON_CYTOPLASMIC_DOMAIN (PHOBIUS); TRANSMEMBRANE (PHOBIUS); CYTOPLASMIC_DOMAIN (PHOBIUS); IPR000299 (PROSITE_PROFILES); IPR011993 (SUPERFAMILY); IPR019748 (SUPERFAMILY); IPR029071 (SUPERFAMILY); TMhelix (TMHMM)
TR5298|c1_g1_i1	PREDICTED: uncharacterized protein LOC105556522	3.13793	0.000221761	0.00307508	1689	0	-		PTHR22955 (PANTHER); PTHR22955:SF3 (PANTHER)
TR24680|c0_g1_i3	serine-enriched protein isoform x3	3.10179	4.76432e-05	0.00154137	1778	1	F:molecular_function	-	IPR000210 (SMART); IPR000210 (PFAM); G3DSA:3.30.710.10 (GENE3D); PTHR24410:SF3 (PANTHER); PTHR24410 (PANTHER); IPR000210 (PROSITE_PROFILES); IPR011333 (SUPERFAMILY)
TR55119|c0_g1_i1	neuroligin-1	3.04513	7.87184e-05	0.00236103	358	2	P:cell adhesion; C:membrane		TRANSMEMBRANE (PHOBIUS); CYTOPLASMIC_DOMAIN (PHOBIUS); TRANSMEMBRANE (PHOBIUS); NON_CYTOPLASMIC_DOMAIN (PHOBIUS); NON_CYTOPLASMIC_DOMAIN (PHOBIUS); TMhelix (TMHMM); TMhelix (TMHMM)
TR36202|c6_g1_i3	methionine-r-sulfoxide reductase b1 isoform x1	3.03426	9.94004e-05	0.00294233	829	3	F:oxidoreductase activity; P:biological_process; P:response to stress	EC:1.8.4.12; EC:1.8.4	IPR002579 (TIGRFAM); IPR002579 (PFAM); IPR002579 (G3DSA:2.170.150.GENE3D); PTHR10173:SF18 (PANTHER); IPR028427 (PANTHER); IPR011057 (SUPERFAMILY)
TR41810|c12_g5_i2	vinculin isoform x6	3.01871	0.000232039	0.00302592	3645	4	F:cytoskeletal protein binding; P:cell adhesion; C:cytoskeleton; F:structural molecule activity	-	PR00806 (PRINTS); G3DSA:1.20.1490.10 (GENE3D); G3DSA:1.20.120.230 (GENE3D); G3DSA:1.20.120.230 (GENE3D); G3DSA:1.20.120.230 (GENE3D); IPR006077 (PFAM); G3DSA:1.20.120.230 (GENE3D); IPR006077 (PANTHER); PTHR18914:SF1 (PANTHER); PTHR18914:SF1 (PANTHER); IPR006077 (PANTHER); IPR006077 (PANTHER); PTHR18914:SF1 (PANTHER); IPR000633 (PROSITE_PATTERNS); IPR006077 (SUPERFAMILY); IPR006077 (SUPERFAMILY); …
TR39701|c9_g2_i9	calcium calmodulin-dependent protein kinase type 1-like isoform x1	2.99944	0.00023442	0.00355062	425	0	-		NON_CYTOPLASMIC_DOMAIN (PHOBIUS); TRANSMEMBRANE (PHOBIUS); CYTOPLASMIC_DOMAIN (PHOBIUS); TMhelix (TMHMM)
TR29800|c0_g1_i1	homeobox protein six1-like isoform x1	2.95291	9.53405e-05	0.00254735	1518	3	P:cellular nitrogen compound metabolic process; P:biosynthetic process; F:DNA binding	-	IPR001356 (SMART); IPR001356 (PFAM); IPR009057 (G3DSA:1.10.10.GENE3D); IPR031701 (PFAM); PTHR10390 (PANTHER); IPR017970 (PROSITE_PATTERNS); IPR001356 (PROSITE_PROFILES); IPR009057 (SUPERFAMILY)
TR34245|c0_g1_i2	cuticular protein analogous to peritrophins 3-c precursor	2.93704	0.000116885	0.0026985	1024	3	C:extracellular region; P:biological_process; F:molecular_function	-	IPR002557 (SMART); IPR002557 (PFAM); IPR002557 (G3DSA:2.170.140.GENE3D); PTHR23301:SF30 (PANTHER); PTHR23301 (PANTHER); SIGNAL_PEPTIDE_H_REGION (PHOBIUS); SIGNAL_PEPTIDE_C_REGION (PHOBIUS); SIGNAL_PEPTIDE (PHOBIUS); NON_CYTOPLASMIC_DOMAIN (PHOBIUS); SIGNAL_PEPTIDE_N_REGION (PHOBIUS); IPR002557 (PROSITE_PROFILES); IPR002557 (PROSITE_PROFILES); IPR002557 (PROSITE_PROFILES); SignalP-noTM (SIGNALP_EU…
TR41873|c2_g4_i2	histone -like	2.93465	4.38542e-05	0.00134572	267	16	F:histone binding; C:organelle; C:extracellular region; C:nuclear chromosome; C:protein complex; F:DNA binding; P:cellular nitrogen compound metabolic process; P:biosynthetic process; P:protein complex assembly; P:chromosome organization; P:DNA metabolic process; P:biological_process; F:molecular_function; P:response to stress; P:immune system process; C:cellular_component	-	IPR000164 (PRINTS); IPR007125 (PFAM); IPR009072 (G3DSA:1.10.20.GENE3D); IPR000164 (PANTHER); IPR000164 (PROSITE_PATTERNS); IPR009072 (SUPERFAMILY)
TR1488|c4_g1_i1	tropomyosin-1 isoform x2	2.92628	7.51188e-05	0.00151865	471	0	-		Coil (COILS); IPR000533 (PRINTS); G3DSA:1.20.5.340 (GENE3D); IPR000533 (PFAM); PTHR19269:SF51 (PANTHER); PTHR19269 (PANTHER); SSF57997 (SUPERFAMILY)
TR8254|c7_g1_i3	ccr4-not transcription complex subunit 6-like isoform x2	2.89463	0.000160801	0.00428784	889	1	F:molecular_function	-	IPR003591 (SMART); IPR032675 (G3DSA:3.80.10.GENE3D); IPR001611 (PFAM); PTHR12121 (PANTHER); PTHR12121:SF35 (PANTHER); IPR001611 (PROSITE_PROFILES); IPR001611 (PROSITE_PROFILES); IPR001611 (PROSITE_PROFILES); IPR032675 (SUPERFAMILY)
TR5649|c0_g1_i5	dynactin subunit 1 isoform x1	2.73256	0.000140036	0.00350338	2314	4	F:molecular_function; C:cytoskeleton; C:protein complex; P:cytoskeleton-dependent intracellular transport	-	Coil (COILS); Coil (COILS); Coil (COILS); Coil (COILS); IPR022157 (PFAM); G3DSA:1.20.5.340 (GENE3D); PTHR18916 (PANTHER); IPR027663 (PTHR18916:PANTHER); SignalP-TM (SIGNALP_GRAM_POSITIVE)
TR20478|c3_g3_i1	PREDICTED: uncharacterized protein LOC103570548 isoform X2	2.7176	0.000345206	0.00531809	733	0	-		no IPS match
TR27504|c0_g1_i2	adenylyltransferase and sulfurtransferase mocs3	2.71751	0.000401035	0.00569775	2276	8	P:cellular protein modification process; F:molecular_function; F:nucleotidyltransferase activity; C:cytosol; P:tRNA metabolic process; P:biosynthetic process; P:cofactor metabolic process; F:ion binding	EC:2.8.1.1	IPR001763 (SMART); IPR016040 (G3DSA:3.40.50.GENE3D); IPR001763 (PFAM); IPR001763 (G3DSA:3.40.250.GENE3D); IPR000594 (PFAM); PTHR10953 (PANTHER); IPR001763 (PROSITE_PROFILES); IPR028885 (HAMAP); IPR000594 (SUPERFAMILY)
TR27536|c4_g1_i5	disco-interacting protein 2 isoform x1	2.54641	0.00039717	0.00565758	5776	2	F:molecular_function; P:biological_process	-	G3DSA:3.40.50.980 (GENE3D); G3DSA:2.30.38.10 (GENE3D); IPR000873 (PFAM); IPR010506 (PFAM); G3DSA:3.40.50.980 (GENE3D); PTHR22754 (PANTHER); SSF56801 (SUPERFAMILY); SSF56801 (SUPERFAMILY)
